# Supplementary material
Source: PubMed Central journal article supplement (PMC3375725)
Supplement: NIHMS370293-supplement-ESI.pdf [file NIHMS370293-supplement-ESI.pdf]

## Supporting Information

### ‘Asymmetric Synthesis of Highly Functionalized Cyclopentanes by a Rhodium- and Scandium-Catalyzed Five-Step Domino Sequence’

*Brendan T. Parr, Zhanjie Li and Huw M. L. Davies\**

Department of Chemistry, Emory University, 440 Atwood Hall, 1515 Dickey Drive, Atlanta, GA 30322.

\* To whom correspondence should be addressed: [hmdavie@emory.edu](mailto:hmdavie@emory.edu)

#### Table of Contents

|                                     |     |
|-------------------------------------|-----|
| 1. Experimental Section .....       | S2  |
| 1.1 General Considerations .....    | S2  |
| 1.2 General Procedures .....        | S3  |
| 1.3 References .....                | S4  |
| 2. Characterization Data.....       | S5  |
| 3. NMR Data for New Compounds ..... | S19 |
| 4. X-Ray Crystallography Data.....  | S55 |

## 1. Experimental Section

### 1.1 General Considerations

All reactions were conducted in oven-dried glassware under an inert atmosphere of dry argon. All reagents were used as received from commercial suppliers, unless specified otherwise. Cyclohexane, dichloroethane, ethyl acetate and heptane solvents and scandium(III) triflate were purchased from Aldrich and used as received. Dichloromethane, hexanes and toluene were obtained from a Grubbs-type solvent purification system.  $^1\text{H}$  NMR spectra were recorded at either 400 MHz on an INOVA-400 spectrometer or at 600 MHz on an INOVA-600 spectrometer.  $^{13}\text{C}$  NMR spectra were recorded at 100 or 150 MHz on the same instruments. NMR spectra were recorded in deuterated chloroform ( $\text{CDCl}_3$ ) solutions, with residual chloroform ( $\delta$  7.27 ppm for  $^1\text{H}$  NMR and  $\delta$  77.23 ppm for  $^{13}\text{C}$  NMR) or tetramethylsilane ( $\delta$  0.00 ppm for  $^1\text{H}$  NMR) taken as the internal standard, and were reported in parts per million (ppm). Abbreviations for signal coupling are as follows: s, singlet; d, doublet; t, triplet; q, quartet; m, multiplet. Coupling constants were taken from the spectra directly and are uncorrected. IR spectra were collected on a Nicolet iS10 FT-IR spectrometer as neat films. Mass spectra determinations were carried out on a Thermo Finnigan LTQ-FTMS spectrometer with ESI or APCI ionization. Optical rotations were measured on JASCO P-2000 polarimeter. Analytical TLC was performed on silica gel plates using UV light or stained with 10% vanillin/1% sulfuric acid/ethanol solution. Flash column chromatography was performed with silica gel 60 A (230-400 mesh). **1a-d**<sup>1</sup>,  $\text{Rh}_2(\mathcal{S}\text{-DOSP})_4$  and  $\text{Rh}_2(\mathcal{R}\text{-DOSP})_4$ <sup>2</sup>, **2a-d**<sup>3</sup>, **2e-f**<sup>4</sup>, **2g**<sup>5</sup>, **2h**<sup>6</sup>, **2i**<sup>7</sup>, **4**<sup>5</sup>, **10**<sup>5</sup> and **13**<sup>8</sup> were all synthesized according to published procedures.

## 1.2 General Procedure for One-Pot Cyclopentane Synthesis

An oven-dried, 25 mL round-bottomed flask, equipped with a stir bar, was capped with a rubber septum and placed under a dry argon atmosphere. The reaction vessel was charged with  $\text{Rh}_2(\text{S-DOSP})_4$  (19 mg, 0.01 mmol, 0.01 equiv) and the allyl alcohol (1.0 mmol, 1.0 equiv) in heptane (1.0 mL). The solution was cooled to 0 °C in an ice bath before adding a heptane solution (10 mL) of the diazo compound (1.1 mmol, 1.1 equiv) drop-wise over 30 min. Following addition, the reaction was stirred at 0 °C for 2 h before warming to rt for 30 min. The rubber septum was removed and the reaction flask was fixed with a reflux condenser and heated to 80 °C for 24 h or until TLC indicated complete conversion of the [2,3]-rearrangement product to a mixture of oxy-Cope and ene products. Scandium triflate (98 mg, 0.20 mmol, 0.20 equiv) was then added in a single portion and the reaction was heated for an additional 2 h or until TLC indicated complete conversion of the oxy-Cope product to the cyclopentane. The reaction was then cooled to ambient temperature and concentrated *in vacuo*. The product was purified by flash chromatography.

### 1.3 References

1. Davies, J. M. L.; Yang, J.; Manning, J. R. *Tetrahedron Asymmetry* 2006, 17, 665.
2. Davies, H. M. L.; Bruzinski, P.; Hutcheson, D. K.; Fall, M. J. . *J. Am. Chem. Soc.* 1996, 118, 6897.
3. Adam, W.; Peters, K.; Peters, E. M.; Stegmann, V. R. *J. Am. Chem. Soc.* 2000, 122, 2958.
4. Griesbeck, A. G.; Blunk, D.; El-Idreesy, T. T.; Raabe, A. *Angew. Chem., Int. Ed.* **2007**, 46, 8883.
5. Li, Z.; Davies, H. M. L. *J. Am. Chem. Soc.* **2010**, 132, 396-401.
6. Kondo, K.; Matsui, K.; Takahatake, Y. *Tetrahedron Lett.* **1976**, 17, 4359-4362.
7. Sato, S.; Matsuda, I.; Izumi, Y. *J. Organomet. Chem.* **1988**, 344, 71-88.
8. Dams, I.; Bialonska, A.; Ciunik, Z.; Wawrzeczyk, C. *Eur. J. Org. Chem.* **2004**, 2662-2668.

## 2. Characterization Data

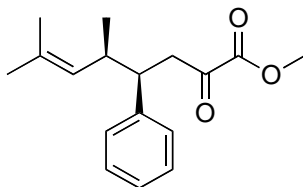

### (+)-(4R,5R)-methyl 5,7-dimethyl-2-oxo-4-phenyloct-6-enoate (**6**).

A 25 mL round-bottomed flask, equipped with a magnetic stirring bar and reflux condenser, was charged with a solution of (*R,E*)-methyl 2-hydroxy-3,3-dimethyl-2-((*E*)-styryl)hex-4-enoate (**4**) (105 mg, 0.38 mmol) in heptane (5 mL). The solution was heated in an oil bath (preheated to 80 °C) for 15 h, until complete consumption of the starting material was apparent by TLC (SiO<sub>2</sub>, pentane/diethyl ether, 10 : 1). The reaction vessel was cooled to ambient temperature and silica gel (500 mg) was added. The mixture was stirred at room temperature for 2 h before concentrating *in vacuo*. The crude was purified on silica gel eluting with pentane : ether (10 : 1), and gave compound **6** as a colorless oil (104 mg, quant.).  $[\alpha]_D^{20}$  63.5° (*c* 1.0, CHCl<sub>3</sub>). <sup>1</sup>H NMR (400 MHz, CDCl<sub>3</sub>):  $\delta$  7.26-7.30 (m, 2H), 7.17-7.21 (m, 3H), 4.88 (d, *J* = 10.0 Hz, 1H), 3.77 (s, 3H), 3.20-3.28 (m, 1H), 2.95-3.03 (m, 2H), 2.52-2.62 (m, 1H), 1.68 (d, *J* = 1.2 Hz, 3H), 1.65 (d, *J* = 1.2 Hz, 3H), 0.70 (d, *J* = 6.4 Hz, 3H). <sup>13</sup>C NMR (100 MHz, CDCl<sub>3</sub>):  $\delta$  193.2, 161.4, 143.3, 132.8, 130.2, 128.6, 128.3, 126.7, 53.0, 48.3, 44.6, 39.0, 26.0, 19.5, 18.4,. FTIR (neat):  $\nu_{max}/\text{cm}^{-1}$  1728, 1452, 1268, 1239, 1096, 1061. HRMS (p-APCI): *m/z* 275.1639 [(M+H)<sup>+</sup> requires 275.1642]. HPLC analysis: 82% ee, (*R,R*)-Whelk 01, 0.5% isopropanol/hexanes, 0.7 mL/min, UV: 230 nm, *t*<sub>R</sub>: 22.30 min (minor), 34.30 min (major).

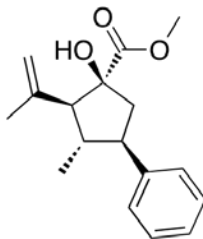

**(+)-(1*S*,2*S*,3*S*,4*R*)-methyl 1-hydroxy-3-methyl-4-phenyl-2-(prop-1-en-2-yl)cyclopentanecarboxylate (7a).**

Prepared by general procedure with methyl styryldiazoacetate (**1a**) (225 mg, 1.1 mmol, 1.0 equiv) and 4-methyl-3-penten-2-ol (**2a**) (101 mg, 1.0 mmol, 1.0 equiv) at rt. The crude was purified on silica gel eluting with hexanes : ethyl acetate (9:1), and gave compound **7a** as a white solid (261 mg, 95%). MP = 40-42 °C.  $[\alpha]_D^{20}$  9.3° (*c* 1.03, CHCl<sub>3</sub>). <sup>1</sup>H NMR (600 MHz, CDCl<sub>3</sub>): δ 7.31 (m, 5H), 5.08 (s, 1H), 4.80 (s, 1H), 3.81 (s, 3H), 2.98 (s, 1H, -OH), 2.83 (dd, *J* = 14.4, 10.2 Hz, 1H), 2.76 (ddd, *J* = 10.2, 8.4, 7.8 Hz, 1H), 2.53 (d, *J* = 12 Hz, 1H), 2.29 (m, 1H), 2.03 (dd, *J* = 14.4, 8.4 Hz, 1H), 1.73 (s, 3H), 0.88 (d, *J* = 6.3 Hz, 3H). <sup>13</sup>C NMR (150 MHz, CDCl<sub>3</sub>): δ 176.9, 144.1, 141.2, 128.4, 127.8, 126.3, 114.8, 81.3, 63.6, 52.7, 51.7, 46.7, 44.8, 23.4, 16.0. FTIR (neat):  $\nu_{max}/\text{cm}^{-1}$  3523, 3027, 2950, 1729, 1450, 1431. HRMS (p-APCD): *m/z* 275.1641 [(M+H)<sup>+</sup> requires 275.1642]. HPLC analysis: 82% ee, CHIRALCEL ODR, 0.5% isopropanol/hexanes, 0.5 mL/min, UV: 210 nm, *t*<sub>R</sub>: 11.54 min (major), 22.08 min (minor).

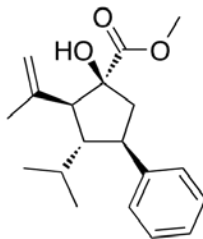

**(-)-(1*S*,2*S*,3*S*,4*R*)-methyl 1-hydroxy-3-isopropyl-4-phenyl-2-(prop-1-en-2-yl)cyclopentanecarboxylate (7b).**

Prepared by general procedure with methyl styryldiazoacetate (**1a**) (226 mg, 1.1 mmol, 1.0 equiv) and 2,5-dimethyl-4-hexen-3-ol (**2b**) (127 mg, 1.0 mmol, 1.0 equiv) at rt. The crude was purified on silica gel eluting with hexanes : ethyl acetate (9:1), and gave compound **7b** as a colorless oil (183 mg, 67%).  $[\alpha]_D^{20}$  -10.2° (*c* 1.07, CHCl<sub>3</sub>). <sup>1</sup>H NMR (600 MHz, CDCl<sub>3</sub>): δ 7.37 (d, *J* = 7.2 Hz, 2H), 7.27 (t, *J* = 7.2 Hz, 2H), 7.16 (t, *J* = 7.2 Hz, 1H), 5.05 (s, 1H), 4.86 (s, 1H), 3.77 (s, 3H), 3.09 (m, 1H), 3.08 (s, 1H), 2.80 (dd, *J* = 14.4, 10.2 Hz, 1H), 2.77 (d, *J* = 12 Hz, 1H), 2.50 (ddd, *J* = 15.0, 12.6, 2.4 Hz, 1H), 1.92 (dd, *J* = 14.4, 7.2 Hz, 1H), 1.77 (s, 3H), 1.75 (m, 1H), 0.87 (d, *J* = 7.2 Hz, 3H), 0.66 (d, *J* = 6.6 Hz, 3H). <sup>13</sup>C NMR (100 MHz, CDCl<sub>3</sub>): δ 176.5, 146.3, 142.2, 128.3, 128.1, 125.9, 114.9, 81.6, 59, 54.2, 52.5, 47.2, 45, 27.7, 23.1, 20.6, 18.5. FTIR (neat):  $\nu_{max}/cm^{-1}$  3512, 3023, 2950, 2923, 1725, 1450, 1431. HRMS (p-APCI): *m/z* 285.1847 [(M-OH)<sup>+</sup> requires 285.1849]. HPLC analysis: 80% ee, CHIRALCEL ODR, 0.5% isopropanol/hexanes, 0.5 mL/min, UV: 210 nm, *t*<sub>R</sub>: 11.27 min (major), 22.50 min (minor).

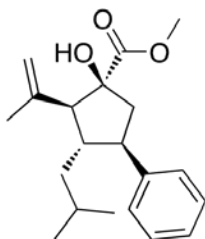

(+)-(1*S*,2*S*,3*S*,4*R*)-methyl

1-hydroxy-3-isobutyl-4-phenyl-2-(prop-1-en-2-

yl)cyclopentanecarboxylate (**7c**).

Prepared by general procedure with methyl styryldiazoacetate (**1a**) (229 mg, 1.1 mmol, 1.0 equiv) and 2,6-dimethyl-2-hepten-4-ol (**2c**) (142 mg, 1.0 mmol, 1.0 equiv) at rt. The crude was purified on silica gel eluting with hexanes : ethyl acetate (9:1), and gave compound **7c** as a white solid (232 mg, 73%). MP = 68-69 °C.  $[\alpha]_D^{20}$  8.6° (*c* 0.50, CHCl<sub>3</sub>). <sup>1</sup>H NMR (600 MHz, CDCl<sub>3</sub>): δ 7.37 (d, *J* = 7.2 Hz, 2H), 7.28 (t, *J* = 7.2 Hz, 2H), 7.18 (t, *J* = 7.2 Hz, 1H), 5.06 (s, 1H), 4.85 (s,

1H), 3.79 (s, 3H), 3.03 (s, 1H), 2.86 (m, 2H), 2.60 (d,  $J = 12$  Hz, 1H), 2.50 (m, 1H), 1.94 (dt,  $J = 7.2, 4.8$  Hz, 1H), 1.75 (s, 3H), 1.29 (m, 1H), 1.25 (m, 2H), 0.68 (d,  $J = 6.6$  Hz, 3H), 0.51 (d,  $J = 6.6$  Hz, 3H).  $^{13}\text{C}$  NMR (150 MHz,  $\text{CDCl}_3$ ):  $\delta$  176.6, 145.8, 141.7, 128.3, 128, 126.1, 114.8, 81.6, 63.1, 52.6, 51.2, 47.8, 47, 43.8, 25.2, 23.9, 23.5, 21.6. FTIR (neat):  $\nu_{\text{max}}/\text{cm}^{-1}$  3520, 3024, 2950, 1725, 1636, 1450, 1431. HRMS (p-APCI):  $m/z$  317.2107 [(M+H) $^+$  requires 317.2111]. HPLC analysis: 80% ee, CHIRALCEL ODR, 0.5% isopropanol/hexanes, 0.5 mL/min, UV: 210 nm,  $t_R$ : 10.94 min (major), 23.52 min (minor).

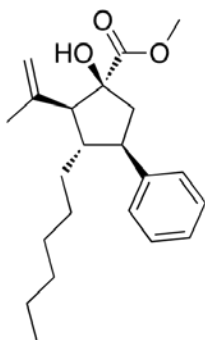

**(-)-(1S,2S,3S,4R)-methyl 3-hexyl-1-hydroxy-4-phenyl-2-(prop-1-en-2-yl)cyclopentanecarboxylate (7d).**

Prepared by general procedure with methyl styryldiazoacetate (**1a**) (228 mg, 1.1 mmol, 1.0 equiv) and 2-methyl-2-decen-4-ol (**2d**) (172 mg, 1.0 mmol, 1.0 equiv) at rt. The crude was purified on silica gel eluting with hexanes : ethyl acetate (9:1), and gave compound **7d** as a colorless oil (276 mg, 80%).  $[\alpha]_{\text{D}}^{20} -3.6^\circ$  ( $c$  1.28,  $\text{CHCl}_3$ ).  $^1\text{H}$  NMR (600 MHz,  $\text{CDCl}_3$ ):  $\delta$  7.34 (d,  $J = 7.5$  Hz, 2H), 7.29 (t,  $J = 7.5$  Hz, 2H), 7.19 (t,  $J = 7.5$  Hz, 1H), 5.07 (s, 1H), 4.83 (s, 1H), 3.79 (s, 3H), 3.01 (s, 1H), 2.93 (dd,  $J = 18.0, 10.2$  Hz, 1H), 2.82 (dd,  $J = 14.1, 11.1$  Hz, 1H), 2.65 (d,  $J = 12.6$  Hz, 1H), 2.40 (m, 1H), 1.96 (dd,  $J = 14.1, 7.8$  Hz, 1H), 1.74 (s, 3H), 1.28-1.39 (m, 2H), 1.13-1.19 (m, 2H), 1.00-1.13 (m, 6H), 0.81 (t,  $J = 7.2$  Hz, 3H).  $^{13}\text{C}$  NMR (100 MHz,  $\text{CDCl}_3$ ):  $\delta$  176.7, 145.3, 141.7, 128.3, 128, 126.1, 114.8, 81.4, 61.5, 52.6, 49.4, 49, 47.1, 31.6,



31.4, 29.5, 26, 23.4, 22.5, 14.0. FTIR (neat):  $\nu_{max}/cm^{-1}$  3520, 2950, 2923, 2849, 1725, 1632, 1454. HRMS (p-APCI):  $m/z$  345.2421 [(M+H)<sup>+</sup> requires 345.2424]. HPLC analysis: 78% ee, CHIRALCEL ODR, 0.5% isopropanol/hexanes, 0.5 mL/min, UV: 210 nm,  $t_R$ : 9.63 min (major), 19.58 min (minor).

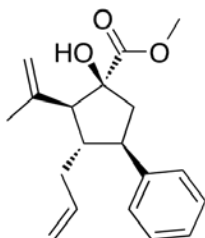

**(-)-(1S,2S,3S,4R)-methyl 3-allyl-1-hydroxy-4-phenyl-2-(prop-1-en-2-yl)cyclopentanecarboxylate (7e).**

Prepared by general procedure with methyl styryldiazoacetate (**1a**) (212 mg, 1.0 mmol, 1.0 equiv) and 6-methyl-1,5-heptadien-4-ol (**2e**) (172 mg, 0.9 mmol, 1.0 equiv) at rt. The crude was purified on silica gel eluting with hexanes : ethyl acetate (9:1), and gave compound **7e** as a colorless oil (232 mg, 86%).  $[\alpha]_D^{20}$  -3.3° (*c* 1.12, CHCl<sub>3</sub>). <sup>1</sup>H NMR (600 MHz, CDCl<sub>3</sub>):  $\delta$  7.33 (t, *J* = 7.8 Hz, 2H), 7.31 (d, *J* = 7.8 Hz, 2H), 7.21 (t, *J* = 7.8 Hz, 1H), 5.67 (ddt, *J* = 16.2, 10.2, 7.2 Hz, 1H), 5.10 (s, 1H), 4.97 (s, 1H), 4.94 (dd, *J* = 7.2, 1.2 Hz, 1H), 4.84 (s, 1H), 3.80 (s, 3H), 3.00 (s, 1H), 2.99 (dt, *J* = 10.8, 7.2 Hz, 1H), 2.81 (ddd, *J* = 14.4, 10.8, 1.2 Hz, 1H), 2.67 (d, *J* = 12.0 Hz, 1H), 2.44 (dddd, *J* = 12.0, 11.4, 5.4, 4.8 Hz, 1H), 2.05-2.14 (m, 2H), 2.01 (dd, *J* = 14.4, 7.8 Hz, 1H), 1.73 (s, 3H). <sup>13</sup>C NMR (100 MHz, CDCl<sub>3</sub>): 176.7, 144.5, 141.0, 134.9, 128.4, 128.1, 126.3, 117.1, 115.1, 81.1, 60.1, 52.7, 49.1, 47.5, 46.5, 33.6, 23.5. FTIR (neat):  $\nu_{max}/cm^{-1}$  3517, 3074, 2950, 2919, 1725, 1632, 1435. HRMS (p-APCI):  $m/z$  283.1690 [(M-OH)<sup>+</sup> requires 283.1693]. HPLC analysis: 76% ee, CHIRALCEL ODR, 0.5% isopropanol/hexanes, 0.5 mL/min, UV: 210 nm,  $t_R$ : 10.68 min (major), 21.29 min (minor).

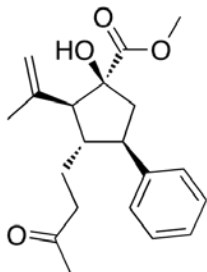

**(+)-(1*S*,2*S*,3*S*,4*R*)-methyl 1-hydroxy-3-(3-oxobutyl)-4-phenyl-2-(prop-1-en-2-yl)cyclopentanecarboxylate (7f).**

Prepared by general procedure with methyl styryldiazoacetate (**1a**) (223 mg, 1.1 mmol, 1.0 equiv) and 5-methyl-1-(2-methyl-1,3-dioxolan-2-yl)4-hexen-3-ol (**2f**) (201 mg, 1.0 mmol, 1.0 equiv) at rt. The crude was purified on silica gel eluting with hexanes : ethyl acetate (5:1), and gave compound **7f** as a colorless oil (149 mg, 45%).  $[\alpha]_D^{20}$  32.7° (*c* 0.50, CHCl<sub>3</sub>). <sup>1</sup>H NMR (600 MHz, CDCl<sub>3</sub>): δ 7.34 (dd, *J* = 7.2, 1.2 Hz, 2H), 7.30 (t, *J* = 7.2 Hz, 2H), 7.21 (dt, *J* = 7.2, 1.2 Hz, 1H), 5.10 (s, 1H), 4.89 (s, 1H), 3.80 (s, 3H), 3.00 (s, 1H), 2.82-2.91(m, 2H), 2.62 (d, *J* = 12.6, 1H), 2.43 (dtd, *J* = 12.0, 7.8, 4.2 Hz, 1H), 2.23 (ddd, *J* = 17.4, 9.0, 7.2 Hz, 1H), 2.12 (ddd, *J* = 17.4, 9.0, 4.8 Hz, 1H), 1.94 (dd, *J* = 13.8, 6.9 Hz), 1.81 (s, 3H), 1.76-1.81 (m, 1H), 1.76 (s, 3H), 1.50 (m, 1H). <sup>13</sup>C NMR (150 MHz, CDCl<sub>3</sub>): 208.6, 176.4, 145.1, 141.2, 128.6, 127.9, 126.4, 115.3, 81.3, 62.1, 52.7, 50.0, 48.0, 47.4, 40.7, 29.6, 26.1, 23.3. FTIR (neat):  $\nu_{max}/\text{cm}^{-1}$  3514, 3063, 3027, 2951, 2928, 1728, 1714, 1638, 1602, 1494, 1436. HRMS (p-APCI): *m/z* 313.1800 [(M-OH)<sup>+</sup> requires 313.1798]. HPLC analysis: 90% ee, CHIRALCEL ODR, 1.0% isopropanol/hexanes, 1.0 mL/min, UV: 210 nm, *t*<sub>R</sub>: 11.01 min (major), 35.53 min (minor).

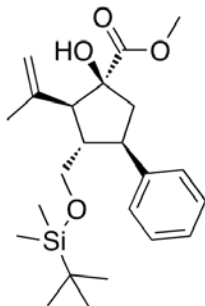

**(1S,2S,3S,4R)-methyl 3-(((*tert*-butyldimethylsilyl)oxy)methyl)-1-hydroxy-4-phenyl-2-(prop-1-en-2-yl)cyclopentanecarboxylate (**7g**).**

Prepared by general procedure, in the absence of scandium(III) triflate, with methyl styryldiazoacetate (**1a**) (225 mg, 1.1 mmol, 1.0 equiv) and 1-(((*tert*-butyldimethylsilyl)oxy)-4-methyl-3-penten-2-ol (**2g**) (230 mg, 1.0 mmol, 1.0 equiv) at rt. The crude was purified on silica gel eluting with hexanes : ethyl acetate (9:1), and gave compound **7g** as a colorless oil (263 mg, 65%).  $[\alpha]_D^{20}$  -5.4° (*c* 1.10, CHCl<sub>3</sub>). <sup>1</sup>H NMR (600 MHz, CDCl<sub>3</sub>): δ 7.32 (m, 5H), 5.09 (s, 1H), 4.81 (s, 1H), 3.82 (s, 3H), 3.51 (dd, *J* = 10.2, 2.4 Hz, 1H), 3.46 (dd, *J* = 10.2, 2.4 Hz, 1H), 3.35 (dt, *J* = 10.2, 7.8 Hz, 1H), 3.04 (d, *J* = 10.2 Hz, 1H), 3.04 (s, 1H), 2.84 (dd, *J* = 14.4, 10.8 Hz, 1H), 2.35 (dt, *J* = 10.8, 2.4 Hz, 1H), 2.07 (dd, *J* = 14.4, 7.8 Hz, 1H), 1.75 (s, 3H), 0.92 (s, 9H), 0.02 (s, 3H), -0.01 (s, 3H). <sup>13</sup>C NMR (150 MHz, CDCl<sub>3</sub>): δ 176.8, 144.6, 141.2, 128.4, 128.1, 126.2, 114.6, 81.2, 59.3, 56.8, 52.6, 52.3, 45.9, 43.9, 25.8, 23.6, 18.2, -5.6, -5.7. FTIR (neat):  $\nu_{max}/cm^{-1}$  3523.4, 3023.5, 2949.8, 2922.7, 2853, 1729.2, 1457.9. HRMS (p-APCI): *m/z* 405.2462 [(M+H)<sup>+</sup> requires 405.2456]. HPLC analysis: 76% ee, CHIRALCEL ODR, 0.5% isopropanol/hexanes, 0.5 mL/min, UV: 210 nm, *t*<sub>R</sub>: 8.36 min (major), 10.26 min (minor).

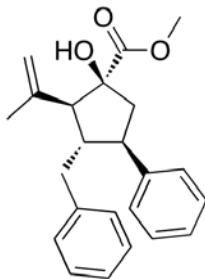

**(-)-(1S,2S,3S,4R)-methyl 3-benzyl-1-hydroxy-4-phenyl-2-(prop-1-en-2-yl)cyclopentanecarboxylate (7h).**

Prepared by general procedure with methyl styryldiazoacetate (**1a**) (225 mg, 1.1 mmol, 1.0 equiv) and 4-methyl-1-phenyl-3-penten-2-ol (**2h**) (178 mg, 1.0 mmol, 1.0 equiv) at rt. The crude was purified on silica gel eluting with hexanes : ethyl acetate (9:1), and gave compound **7h** as a white solid (147 mg, 42%). MP = 62-64 °C.  $[\alpha]_D^{20}$  -34.7° (*c* 1.15, CHCl<sub>3</sub>). <sup>1</sup>H NMR (600 MHz, CDCl<sub>3</sub>): δ 7.32 (d, *J* = 7.2 Hz, 2H), 7.28 (t, *J* = 7.8 Hz, 1H), 7.16-7.19 (m, 2H), 7.13 (t, *J* = 7.2 Hz, 1H), 6.98 (d, *J* = 7.2 Hz, 2H), 5.12 (s, 1H), 4.88 (s, 1H), 3.72 (s, 3H), 2.99 (s, 1H), 2.92 (dt, *J* = 10.8, 7.8 Hz, 1H), 2.67-2.77 (m, 3H), 2.61 (dd, *J* = 14.1, 5.1 Hz, 1H), 2.55 (d, *J* = 12.0 Hz, 1H), 1.90 (dd, *J* = 14.7, 7.2 Hz, 1H), 1.69 (s, 3H). <sup>13</sup>C NMR (150 MHz, CDCl<sub>3</sub>): δ 176.5, 144.4, 141.0, 138.5, 130.0, 128.4, 128.2, 127.8, 126.2, 125.8, 115.5, 81.0, 60.1, 52.6, 49.7, 47.2, 46.7, 35.4, 23.3. FTIR (neat):  $\nu_{max}/cm^{-1}$  3524, 3062, 3027, 2951, 2922, 2851, 1731, 1602, 1495, 1454, 1438, 1231. HRMS (p-APCI): *m/z* 351.1958 [(M+H)<sup>+</sup> requires 351.1955]. HPLC analysis: 92% ee, CHIRALCEL ODR, 0.5% isopropanol/hexanes, 0.5 mL/min, UV: 210 nm, *t*<sub>R</sub>: 15.80 min (major), 23.47 min (minor).

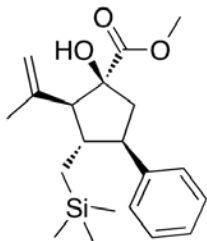

**(-)-(1S,2S,3S,4R)-methyl 1-hydroxy-4-phenyl-2-(prop-1-en-2-yl)-3-((trimethylsilyl)methyl)cyclopentanecarboxylate (7i).**

Prepared by general procedure with methyl styryldiazoacetate (**1a**) (229 mg, 1.1 mmol, 1.0 equiv) and 4-methyl-1-(trimethylsilyl)-3-penten-2-ol (**2i**) (176 mg, 1.0 mmol, 1.0 equiv) at rt. The crude was purified on silica gel eluting with hexanes : ethyl acetate (9:1), and gave compound **7i** as a colorless oil (204 mg, 59%).  $[\alpha]_D^{20}$  -0.6° (*c* 1.73, CHCl<sub>3</sub>). <sup>1</sup>H NMR (600 MHz, CDCl<sub>3</sub>): δ 7.29-7.35 (m, 4H), 7.21 (tt, *J* = 7.2, 1.2 Hz, 1H), 5.13 (s, 1H), 4.85 (s, 1H), 3.81 (s, 3H), 2.98 (s, 1H), 2.82-2.89 (m, 2H), 2.87 (d, *J* = 12.0 Hz, 1H), 2.57 (dddd, *J* = 15.0, 10.2, 7.2, 3.0 Hz, 1H), 1.93 (m, 1H), 1.75 (s, 3H), 0.74 (dd, *J* = 15.0, 3.0 Hz, 1H), 0.61 (dd, *J* = 15.0, 7.8 Hz, 1H), -0.25 (s, 9H). <sup>13</sup>C NMR (150 MHz, CDCl<sub>3</sub>): δ 176.8, 144.4, 141.3, 128.4, 128.2, 126.4, 115.3, 80.9, 64.6, 52.6, 52.1, 47.8, 45.7, 23.6, 19.3, -0.4. FTIR (neat):  $\nu_{max}/cm^{-1}$  3523, 3064, 3028, 2951, 2895, 1729, 1638, 1602, 1495, 1455, 1436, 1246, 1201. HRMS (p-APCI): *m/z* 347.2041 [(M+H)<sup>+</sup> requires 347.2037]. HPLC analysis: 83% ee, CHIRALCEL ODR, 0.5% isopropanol/hexanes, 0.5 mL/min, UV: 210 nm, *t*<sub>R</sub>: 10.24 min (major), 26.93 min (minor).

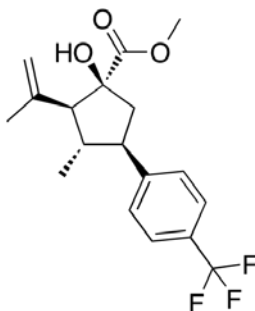

**(+)-(1*S*,2*S*,3*S*,4*R*)-methyl 1-hydroxy-3-methyl-2-(prop-1-en-2-yl)-4-(4-(trifluoromethyl)phenyl)cyclopentanecarboxylate (9a).**

Prepared by general procedure with methyl 4-(trifluoromethyl)styryldiazoacetate (**8a**) (315 mg, 1.1 mmol, 1.0 equiv) and 4-methyl-3-penten-2-ol (**2a**) (102 mg, 1.0 mmol, 1.0 equiv) at rt. The crude was purified on silica gel eluting with hexanes : ethyl acetate (10:1), and gave compound **9a** as a white solid (215 mg, 63%). MP = 71-75 °C.  $[\alpha]_D^{20}$  4.4° (*c* 1.03, CHCl<sub>3</sub>). <sup>1</sup>H NMR (600 MHz, CDCl<sub>3</sub>): δ 7.56 (d, *J* = 7.5 Hz, 2H), 7.44 (d, *J* = 7.5 Hz, 2H), 5.09 (s, 1H), 4.80 (s, 1H), 3.81 (s, 3H), 3.05(s, 1H), 2.81-2.89 (m, 2H), 2.55 (d, *J* = 12.0 Hz, 1H), 2.30 (m, 1H), 2.02 (ddd, *J* = 13.8, 10.2, 7.8 Hz, 1H), 1.73 (s, 3H), 0.89 (d, *J* = 6.0 Hz, 3H). <sup>13</sup>C NMR (100 MHz, CDCl<sub>3</sub>): δ 176.5, 148.5, 140.8, 128.2, 125.4, 125.3, 125.3, 114.9, 81.4, 63.6, 52.7, 51.4, 46.4, 45.1, 23.3, 15.9. FTIR (neat):  $\nu_{max}/cm^{-1}$  3519, 2955, 1731, 1640, 1618, 1438, 1323, 1120, 1067. HRMS (p-APCI): *m/z* 343.1516 [(M+H)<sup>+</sup> requires 343.1516]. HPLC analysis: 78% ee, CHIRALCEL ODR, 1.0% isopropanol/hexanes, 1.0 mL/min, UV: 210 nm, *t*<sub>R</sub>: 5.61 min (major), 7.25 min (minor).

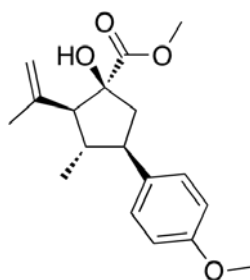

**(+)-(1*S*,2*S*,3*S*,4*R*)-methyl 1-hydroxy-4-(4-methoxyphenyl)-3-methyl-2-(prop-1-en-2-yl)cyclopentanecarboxylate (9b).**

Prepared by general procedure with methyl 4-methoxystyryldiazoacetate (**8b**) (255 mg, 1.1 mmol, 1.0 equiv) and 4-methyl-3-penten-2-ol (**2a**) (101 mg, 1.0 mmol, 1.0 equiv) at rt. The crude was purified on silica gel eluting with hexanes : ethyl acetate (4:1), and gave compound **9b** as a

colorless oil (261 mg, 94%).  $[\alpha]_D^{20}$  4.3° (*c* 1.25, CHCl<sub>3</sub>). <sup>1</sup>H NMR (600 MHz, CDCl<sub>3</sub>): δ 7.25 (d, *J* = 8.7 Hz, 2H), 6.86 (d, *J* = 8.7 Hz, 2H), 5.07 (s, 1H), 4.79 (s, 1H), 3.80 (s, 3H), 3.79 (s, 3H), 2.98 (s, 1H), 2.80 (dd, *J* = 14.1, 10.2 Hz), 2.70 (dd, *J* = 18.6, 10.2 Hz, 1H), 2.51 (d, *J* = 12.0 Hz, 1H), 2.23 (ddq, *J* = 12.6, 10.4, 6.4 Hz, 1H), 1.98 (dd, *J* = 14.1, 8.2 Hz, 1H), 1.72 (s, 3H), 0.87 (d, *J* = 6.0 Hz, 3H). <sup>13</sup>C NMR (100 MHz, CDCl<sub>3</sub>): δ 176.9, 158.1, 141.2, 136.0, 128.7, 114.7, 113.8, 81.1, 63.5, 55.2, 52.6, 50.9, 46.8, 44.8, 23.3, 16.0. FTIR (neat):  $\nu_{max}/cm^{-1}$  3518, 2952, 2835, 1729, 1611, 1512, 1439, 1243, 1178, 1036. HRMS (p-APCI): *m/z* 305.1748 [(M+H)<sup>+</sup> requires 305.1747]. HPLC analysis: 87% ee, CHIRALCEL ODR, 1.0% isopropanol/hexanes, 1.0 mL/min, UV: 210 nm, *t*<sub>R</sub>: 7.55 min (minor), 11.12 min (major).

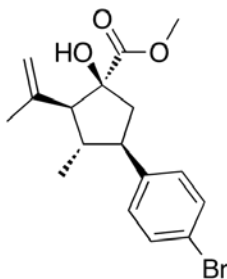

**(+)-(1*S*,2*S*,3*S*,4*R*)-methyl 4-(4-bromophenyl)-1-hydroxy-3-methyl-2-(prop-1-en-2-yl)cyclopentanecarboxylate (9c).**

Prepared by general procedure with methyl 4-bromostyryldiazoacetate (**8c**) (319 mg, 1.1 mmol, 1.0 equiv) and 4-methyl-3-penten-2-ol (**2a**) (101 mg, 1.0 mmol, 1.0 equiv) at rt. The crude was purified on silica gel eluting with hexanes : ethyl acetate (9:1), and gave compound **9c** as a white solid (171 mg, 48%). MP = 71-72 °C.  $[\alpha]_D^{20}$  1.8° (*c* 1.05, CHCl<sub>3</sub>). <sup>1</sup>H NMR (600 MHz, CDCl<sub>3</sub>): δ 7.43 (d, *J* = 8.7 Hz, 2H), 7.20 (d, *J* = 8.7 Hz, 2H), 5.08 (s, 1H), 4.79 (s, 1H), 3.81 (s, 3H), 3.00 (s, 1H), 2.83 (dd, *J* = 14.1, 10.5 Hz, 1H), 2.72 (td, *J* = 10.5, 8.1 Hz, 1H), 2.56 (d, *J* = 6.0 Hz, 1H), 2.24 (tq, *J* = 6.6, 6.0 Hz, 1H), 1.96 (dd, *J* = 14.1, 8.1 Hz, 1H), 1.72 (s, 3H), 0.87 (d, *J* = 6.6 Hz,

3H).  $^{13}\text{C}$  NMR (150 MHz,  $\text{CDCl}_3$ ):  $\delta$  176.6, 143.2, 141.0, 131.5, 129.6, 120.0, 114.9, 81.2, 63.5, 52.7, 51.1, 46.5, 44.9, 23.3, 15.9. FTIR (neat):  $\nu_{\text{max}}/\text{cm}^{-1}$  3521, 3072, 2952, 2924, 2868, 1729, 1639, 1487, 1436, 1010. HRMS (p-APCI):  $m/z$  335.0640 [(M-OH) $^+$  requires 335.0641]. HPLC analysis: 92% ee, CHIRALCEL ADH, 1.0% isopropanol/hexanes, 1.0 mL/min, UV: 230 nm,  $t_{\text{R}}$ : 13.20 min (major), 14.34 min (minor).

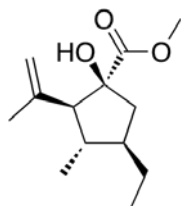

**(-)-(1S,2S,3S,4R)-methyl 4-ethyl-1-hydroxy-3-methyl-2-(prop-1-en-2-yl)cyclopentanecarboxylate (9d).**

Prepared by general procedure with (*E*)-methyl 2-diazo-3-hexenoate (**8d**) (174 mg, 1.1 mmol, 1.0 equiv) and 4-methyl-3-penten-2-ol (**2a**) (102 mg, 1.0 mmol, 1.0 equiv) at rt. The crude was purified on silica gel eluting with hexanes : ethyl acetate (9:1), and gave compound **9d** as a colorless oil (142 mg, 63%).  $[\alpha]_{\text{D}}^{20}$  -0.4 $^{\circ}$  ( $c$  2.03,  $\text{CHCl}_3$ ).  $^1\text{H}$  NMR (600 MHz,  $\text{CDCl}_3$ ):  $\delta$  5.04 (s, 1H), 4.75 (s, 1H), 3.77 (s, 3H), 2.80 (s, 1H), 2.54 (dd,  $J$  = 13.2, 9.0 Hz, 1H), 2.38 (d,  $J$  = 12.0 Hz, 1H), 1.81-1.87 (m, 1H), 1.68 (s, 3H), 1.64-1.70 (m, 1H), 1.49-1.55 (m, 2H), 1.20-1.27 (m, 1H), 0.95 (d,  $J$  = 6.6 Hz, 3H), 0.91 (t,  $J$  = 7.5 Hz, 3H).  $^{13}\text{C}$  NMR (150 MHz,  $\text{CDCl}_3$ ):  $\delta$  177.3, 141.6, 114.4, 81.1, 63.8, 52.5, 46.6, 44.0, 41.6, 27.1, 23.4, 16.7, 12.5. FTIR (neat):  $\nu_{\text{max}}/\text{cm}^{-1}$  3526, 3072, 2956, 2926, 2874, 1731, 1639, 1457, 1437, 1233, 1077. HRMS (p-APCI):  $m/z$  227.1640 [(M+H) $^+$  requires 227.1642]. HPLC analysis: 64% ee, CHIRALCEL ADH, 1.0% isopropanol/hexanes, 0.5 mL/min, UV: 210 nm,  $t_{\text{R}}$ : 22.09 min (minor), 22.03 min (major).



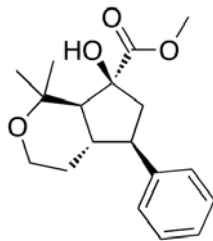

**(+)-(4*a*S,5*R*,7*S*,7*a*R)-methyl 7-hydroxy-1,1-dimethyl-5-phenyloctahydrocyclopenta[*c*]pyran-7-carboxylate (12).**

Prepared by general procedure with methyl styryldiazoacetate (**1a**) (227 mg, 1.1 mmol, 1.0 equiv) and 1-((*tert*-butyldimethylsilyl)oxy)-5-methyl-4-hexen-3-ol (**11**) (244 mg, 1.0 mmol, 1.0 equiv). The crude was purified on silica gel eluting with hexanes : ethyl acetate (4:1), and gave compound **12** as a white solid (141 mg, 46%). MP = 94-96 °C.  $[\alpha]_D^{20}$  14.0° (*c* 1.07, CHCl<sub>3</sub>). <sup>1</sup>H NMR (600 MHz, CDCl<sub>3</sub>): δ 7.29-7.33 (m, 4H), 7.21-7.23 (m, 1H), 3.85 (s, 3H), 3.69 (ddd, *J* = 12.0, 5.4, 1.2 Hz, 1H), 3.51 (td, *J* = 12.0, 2.4 Hz, 1H), 3.34 (s, 1H), 2.71 (m, 2H), 2.21 (m, 1H), 1.94 (d, *J* = 13.2 Hz, 1H), (1.91 (dd, *J* = 18.9, 12.9 Hz, 1H), 1.74 (dddd, *J* = 12.6, 1.2, 1.2, 1.2 Hz, 1H), 1.39 (qd, *J* = 12.6, 5.4 Hz), 1.33 (s, 3H), 1.13 (s, 1H). <sup>13</sup>C NMR (100 MHz, CDCl<sub>3</sub>): δ 178.2, 143.5, 128.5, 127.6, 126.4, 80.3, 74.9, 60.8, 60.2, 53.0, 50.4, 48.8, 44.5, 32.5, 28.8, 21.1. FTIR (neat):  $\nu_{max}/cm^{-1}$  3510, 3026, 2974, 2929, 2861, 1426, 1601, 1436, 1202, 1099. HRMS (p-APCI): *m/z* 305.1748 [(M+H)<sup>+</sup> requires 305.1747]. HPLC analysis: 80% ee, CHIRALCEL ODR, 1.0% isopropanol/hexanes, 01.0 mL/min, UV: 210 nm, *t*<sub>R</sub>: 9.63 min (major), 23.30 min (minor).

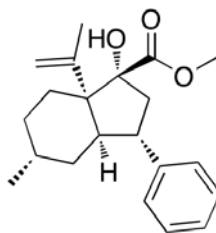

**(-)-(1*R*,3*S*,3*aR*,5*R*,7*aR*)-methyl 1-hydroxy-5-methyl-3-phenyl-7*a*-(prop-1-en-2-yl)octahydro-1*H*-indene-1-carboxylate (**14**).**

Prepared by general procedure, in the absence of scandium(III) triflate, with methyl styryldiazoacetate (**1a**) (229 mg, 1.1 mmol, 1.0 equiv), (-)-(*R,R*)-pulegol (**13**) (155 mg, 1.0 mmol, 1.0 equiv) and Rh<sub>2</sub>(*R*-DOSP)<sub>4</sub>. The crude was purified on silica gel eluting with hexanes : ethyl acetate (7:1), and gave compound **14** as a colorless oil (227 mg, 69%).  $[\alpha]_D^{20}$  -5.4° (c 1.10, CHCl<sub>3</sub>).  $[\alpha]_D^{20}$  -4.6° (c 1.09, CHCl<sub>3</sub>). <sup>1</sup>H NMR (600 MHz, CDCl<sub>3</sub>): δ 7.37 (d, *J* = 6.9 Hz, 2H), 7.30 (t, *J* = 6.9 Hz, 2H), 7.20 (t, *J* = 6.9 Hz, 1H), 5.34 (s, 1H), 4.99 (s, 1H), 3.75 (s, 3H), 3.35 (dt, *J* = 11.1, 5.4 Hz, 1H), 3.10 (ddd, *J* = 14.4, 11.7, 2.4 Hz, 1H), 2.96 (d, *J* = 2.4 Hz, 1H), 2.65 (m, 1H), 2.08 (dd, *J* = 14.7, 5.1 Hz, 1H), 1.70-1.81 (m, 2H), 1.68 (s, 3H), 1.59-1.64 (m, 2H), 1.41 (m, 1H), 0.99 (ddd, *J* = 17.7, 12.6, 5.4 Hz, 1H), 0.85 (d, *J* = 6.6 Hz, 3H), 0.77 (dtd, *J* = 16.2, 12.0, 3.0 Hz, 1H). <sup>13</sup>C NMR (100 MHz, CDCl<sub>3</sub>): δ 174.5, 146.2, 143.0, 128.3, 128.2, 126.1, 117.8, 83.9, 59.3, 52.1, 50.0, 44.5, 43.0, 31.6, 30.6, 27.2, 26.4, 22.5, 21.5. FTIR (neat):  $\nu_{max}/cm^{-1}$  3540, 3085, 3026, 2950, 2912, 2868, 2847, 1727, 1629, 1604, 1494, 1447. HRMS (p-APCI): *m/z* 329.2113 [(M+H)<sup>+</sup> requires 329.2111].

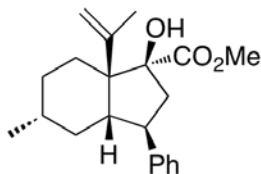

**(1*S*,3*R*,3*aS*,5*R*,7*aS*)-methyl 1-hydroxy-5-methyl-3-phenyl-7*a*-(prop-1-en-2-yl)octahydro-1*H*-indene-1-carboxylate (**15**).** Prepared by general procedure, in the absence of scandium(III) triflate, with methyl styryldiazoacetate (**1a**) (229 mg, 1.1 mmol, 1.0 equiv), (-)-(*R,R*)-pulegol (**13**) (155 mg, 1.0 mmol, 1.0 equiv) and Rh<sub>2</sub>(*S*-DOSP)<sub>4</sub>. The crude was purified on silica gel

eluting with hexanes : ethyl acetate (7:1), and gave an inseparable mixture of compounds **14** and **15** (1 : 2.1) as a colorless oil (combined yield: 187 mg, 59%).

### **3. NMR Data for New Compounds**



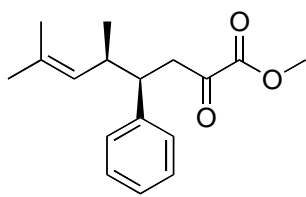

6  
CDCl<sub>3</sub>  
100 MHz

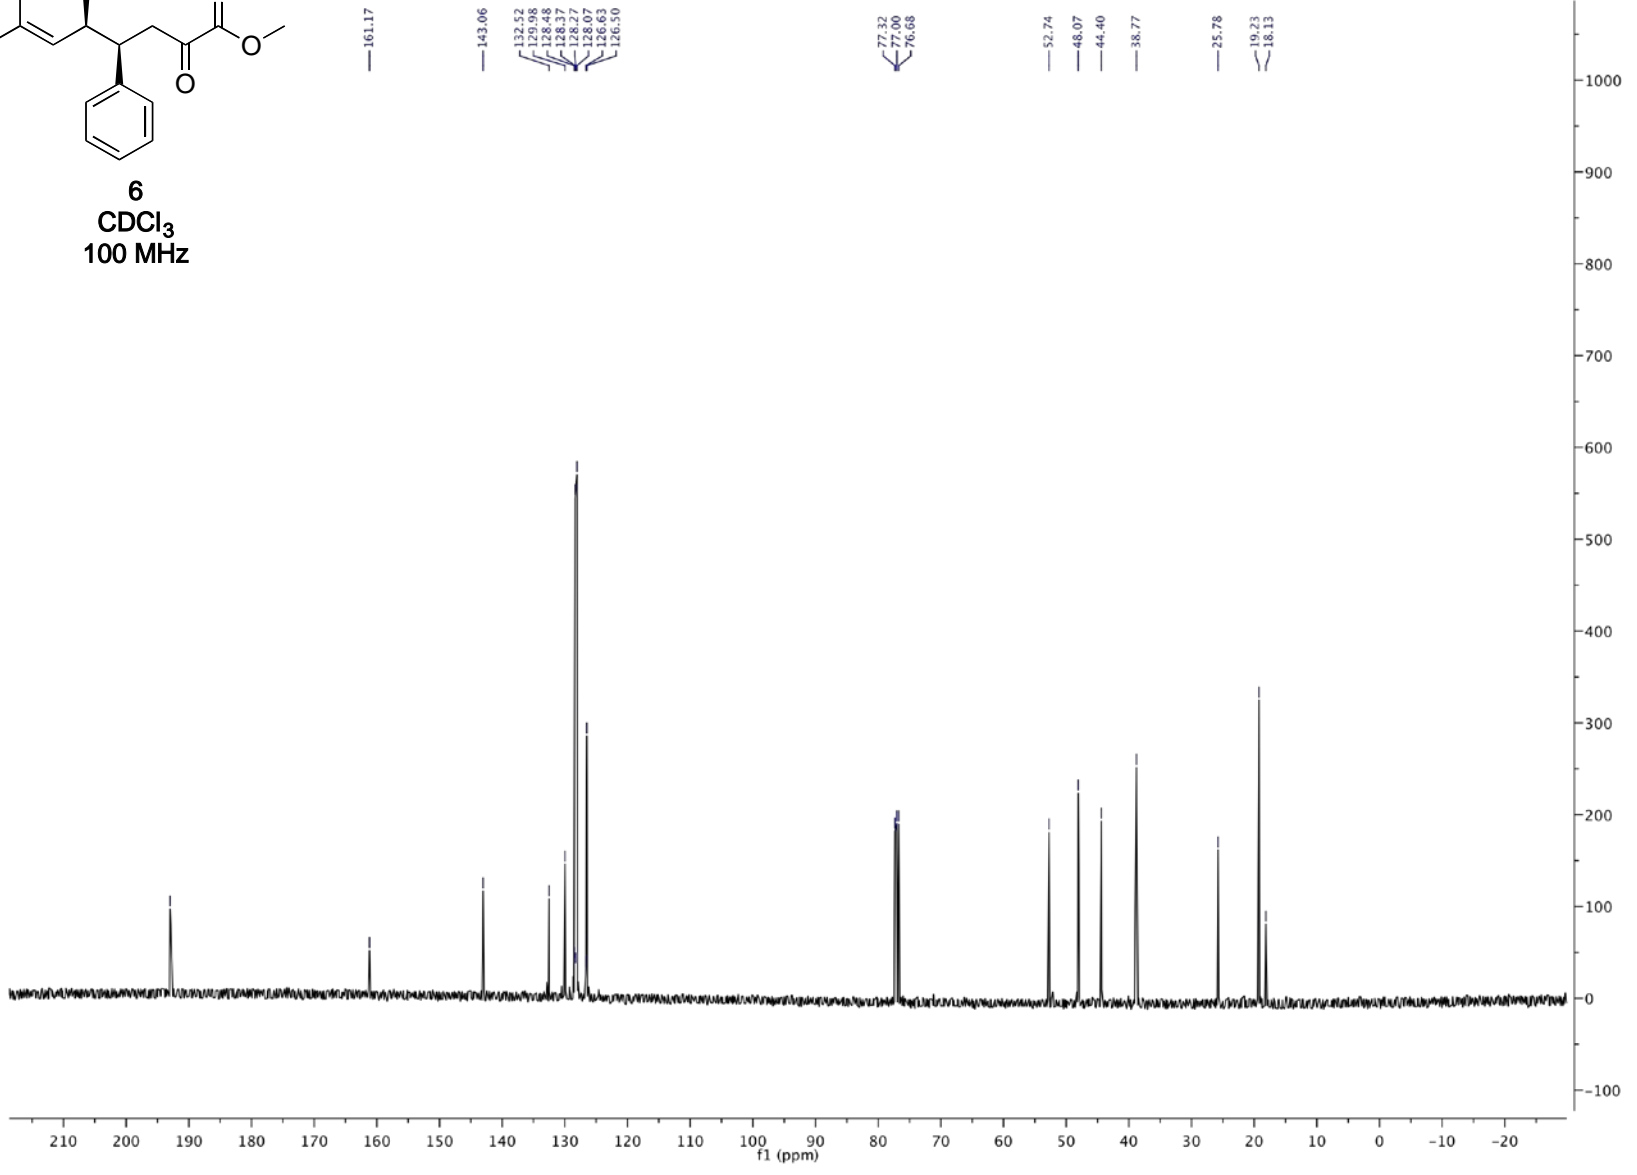



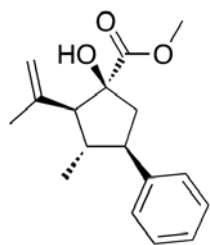

**7a**  
**CDCl<sub>3</sub>**  
**100 MHz**

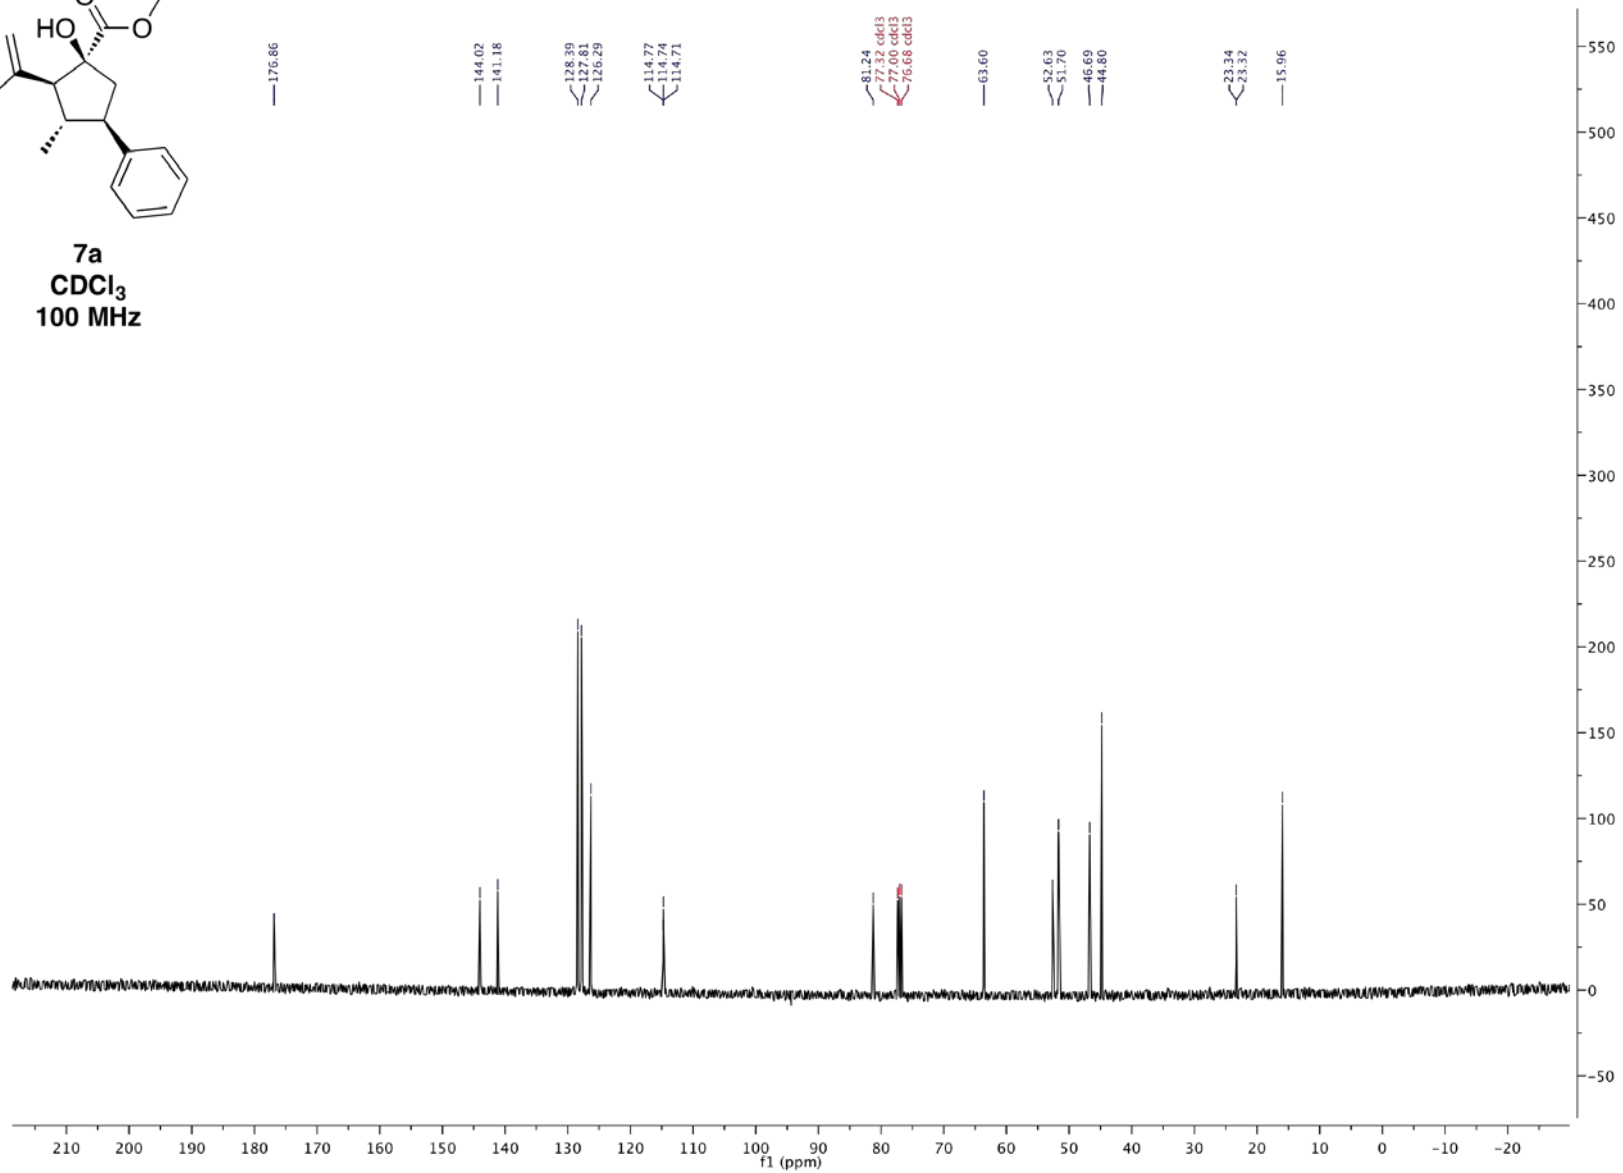



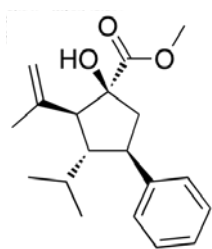

**7b**  
**CDCl<sub>3</sub>**  
**600 MHz**

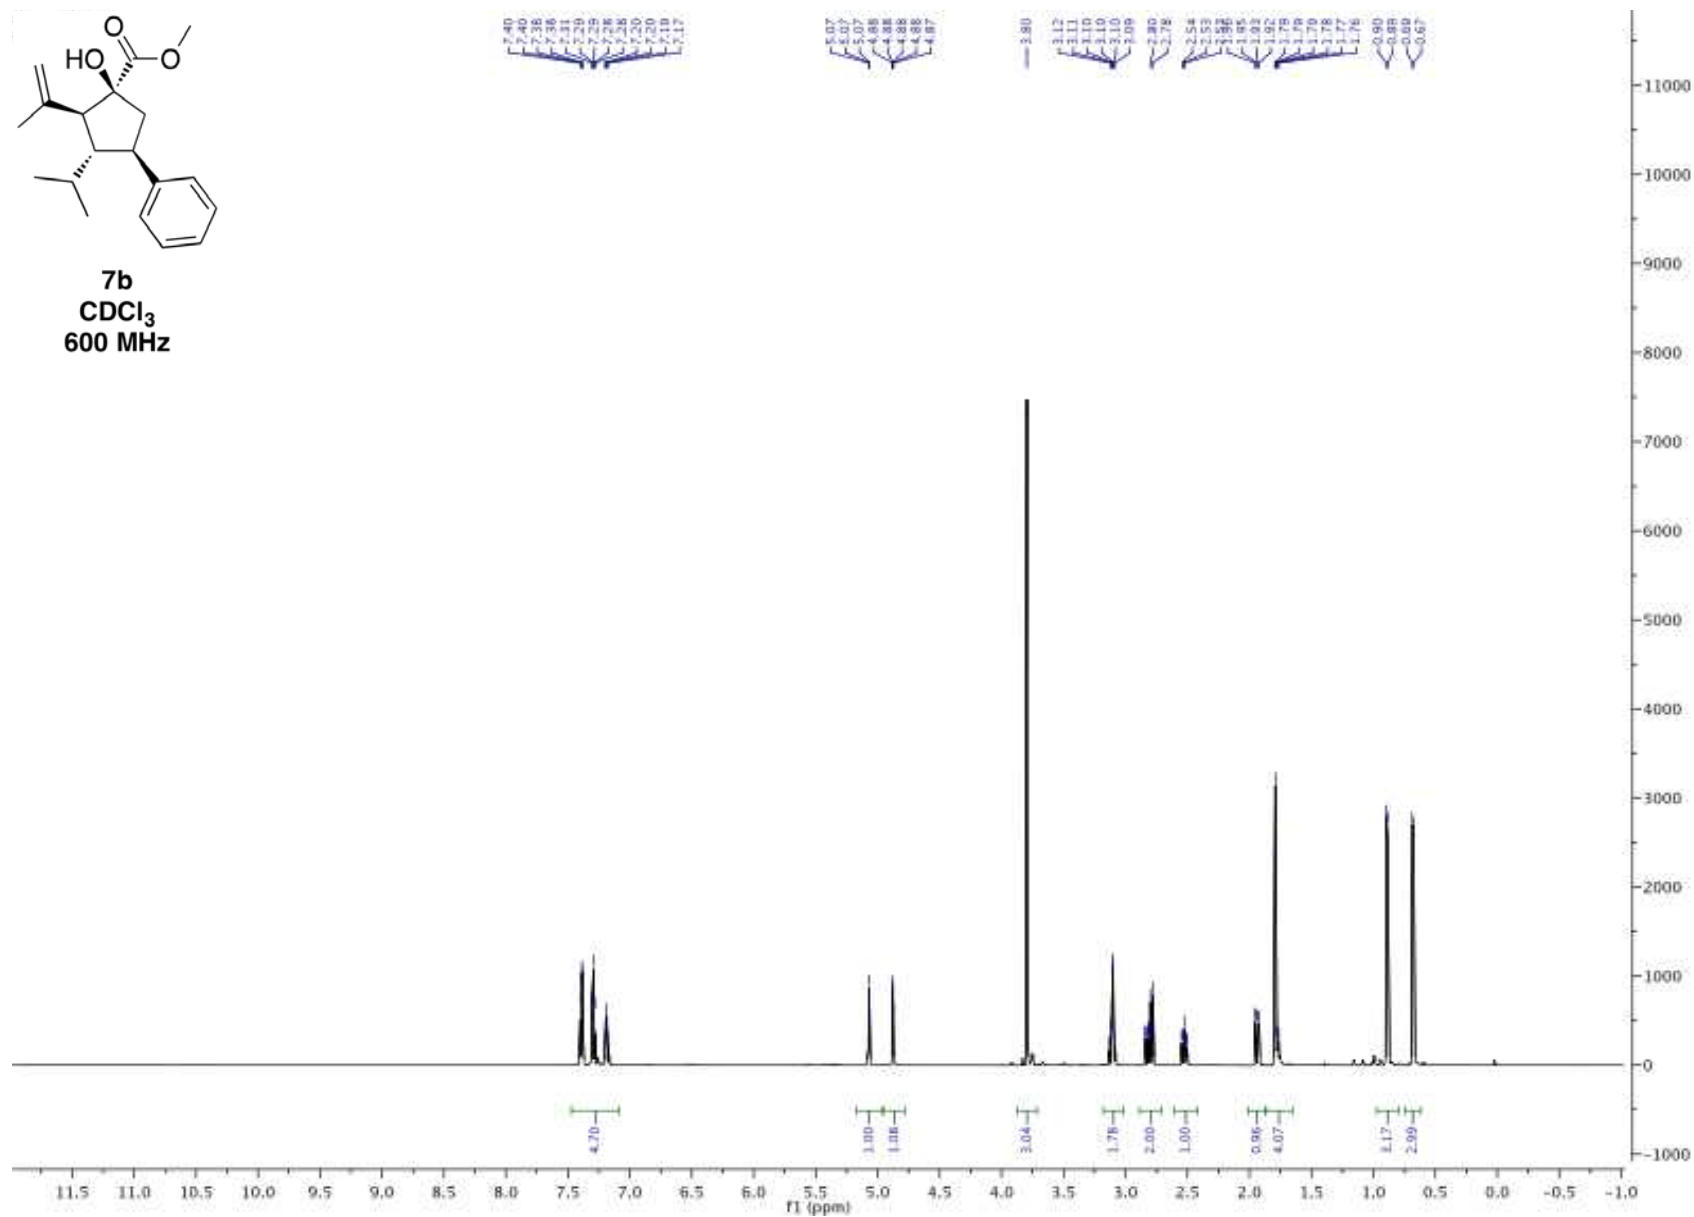

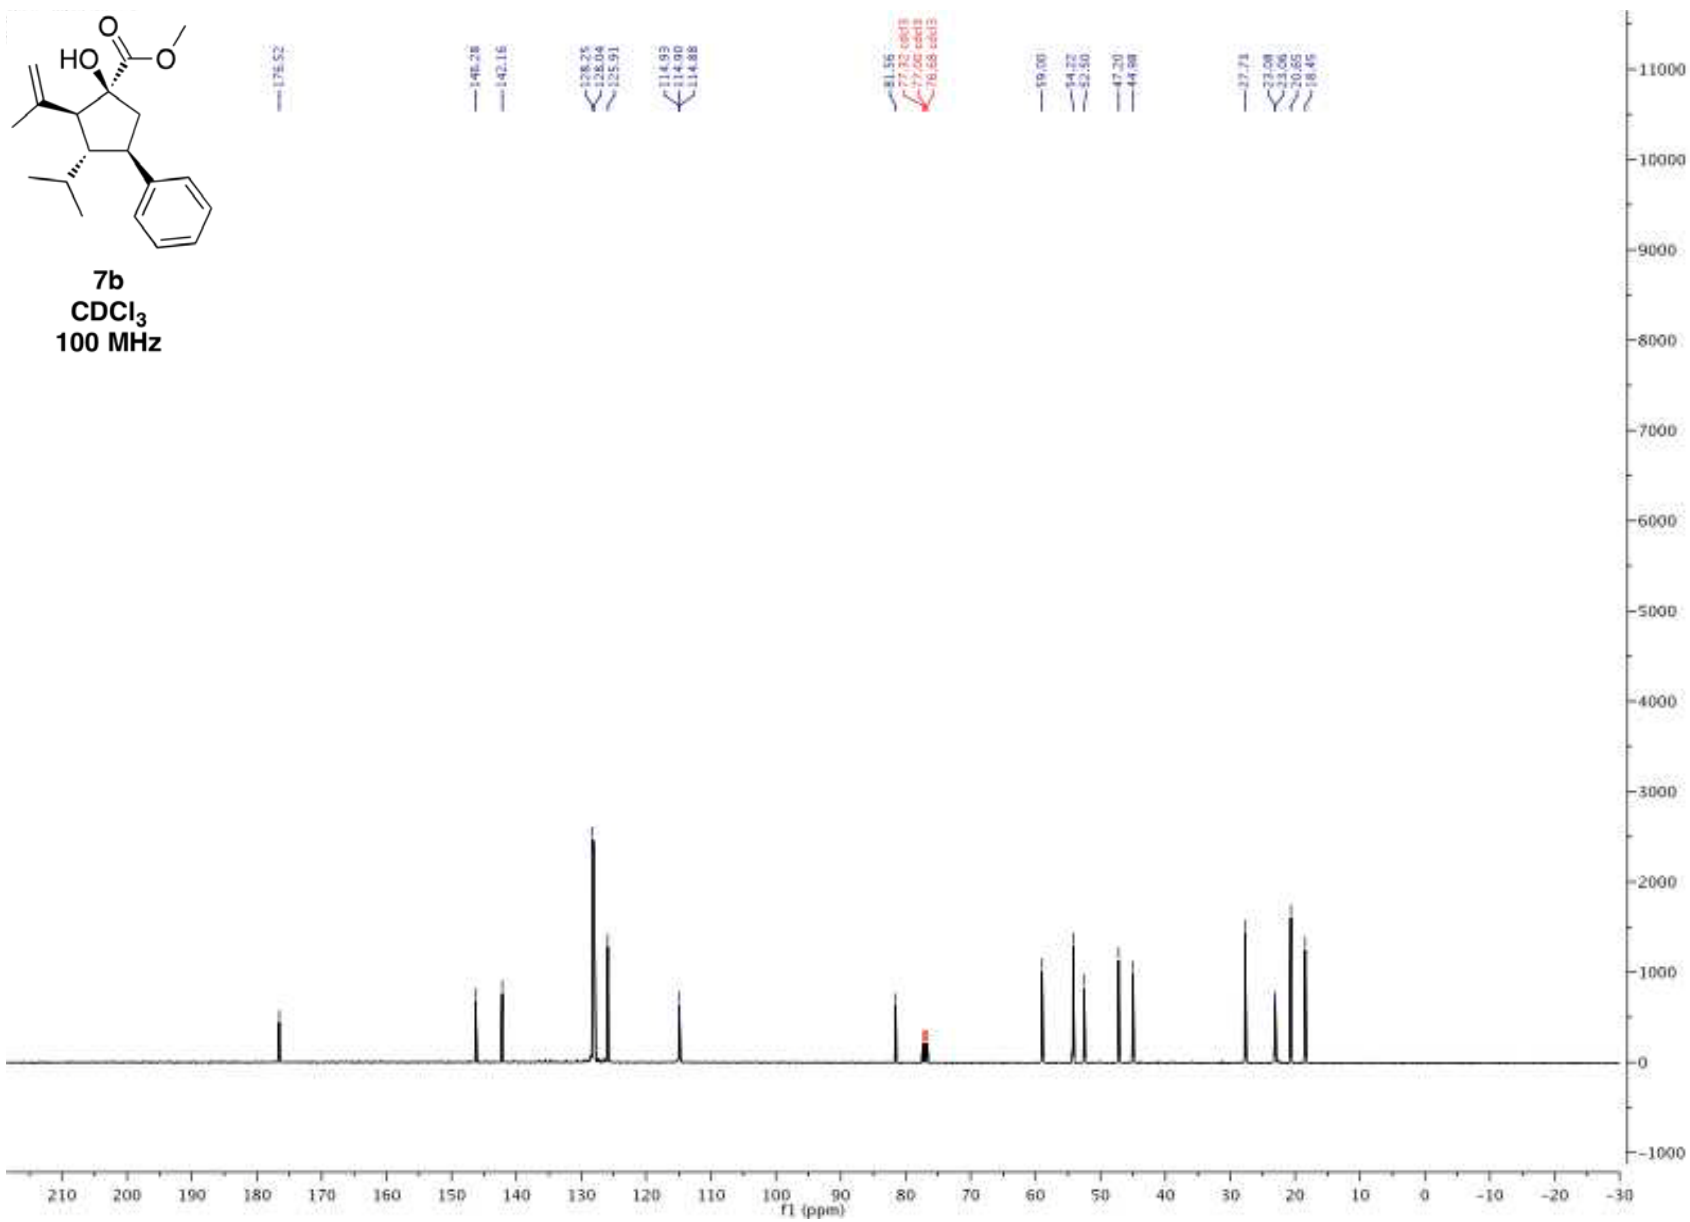

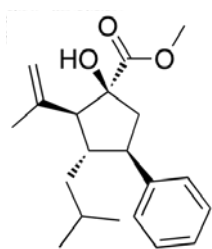

**7c**  
**CDCl<sub>3</sub>**  
**600 MHz**

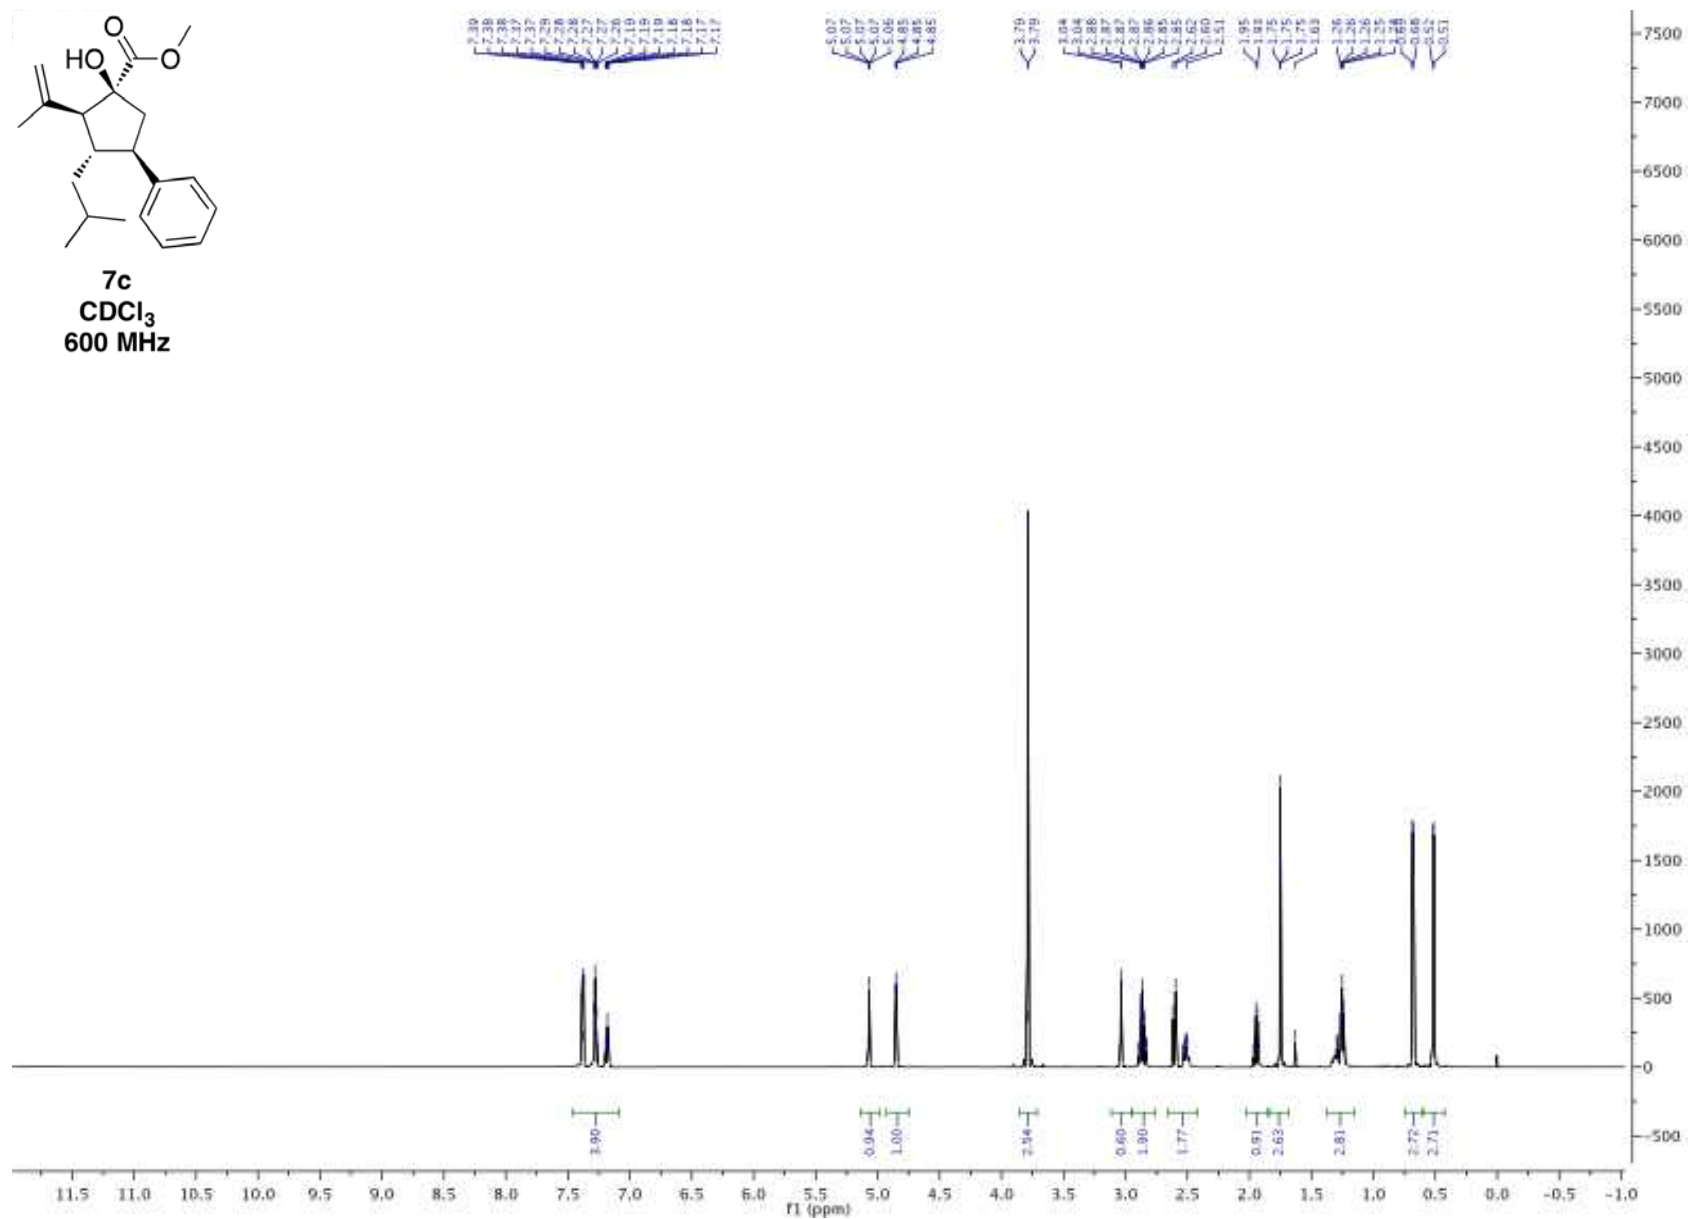

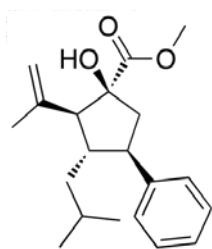

**7c**  
**CDCl<sub>3</sub>**  
**100 MHz**

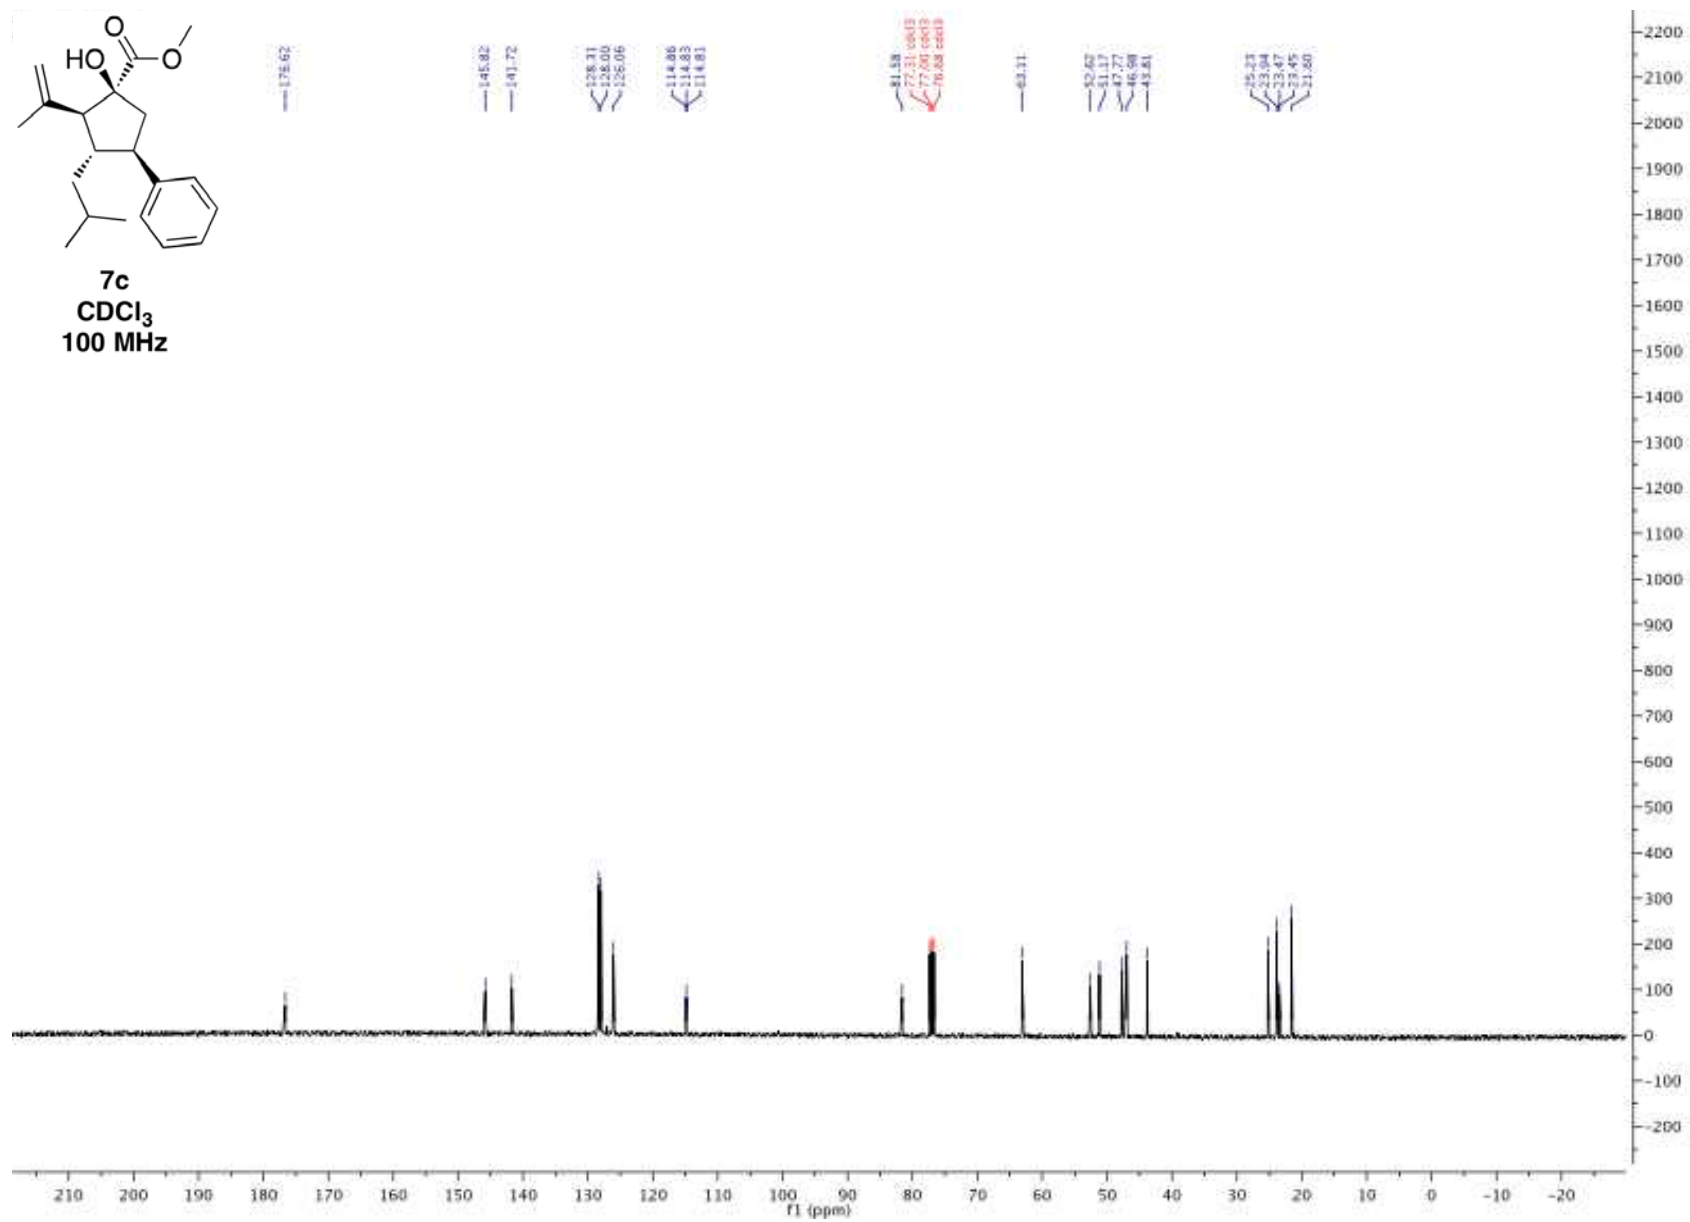

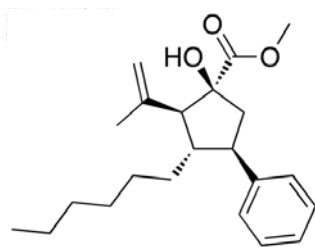

**7d**  
**CDCl<sub>3</sub>**  
**600 MHz**

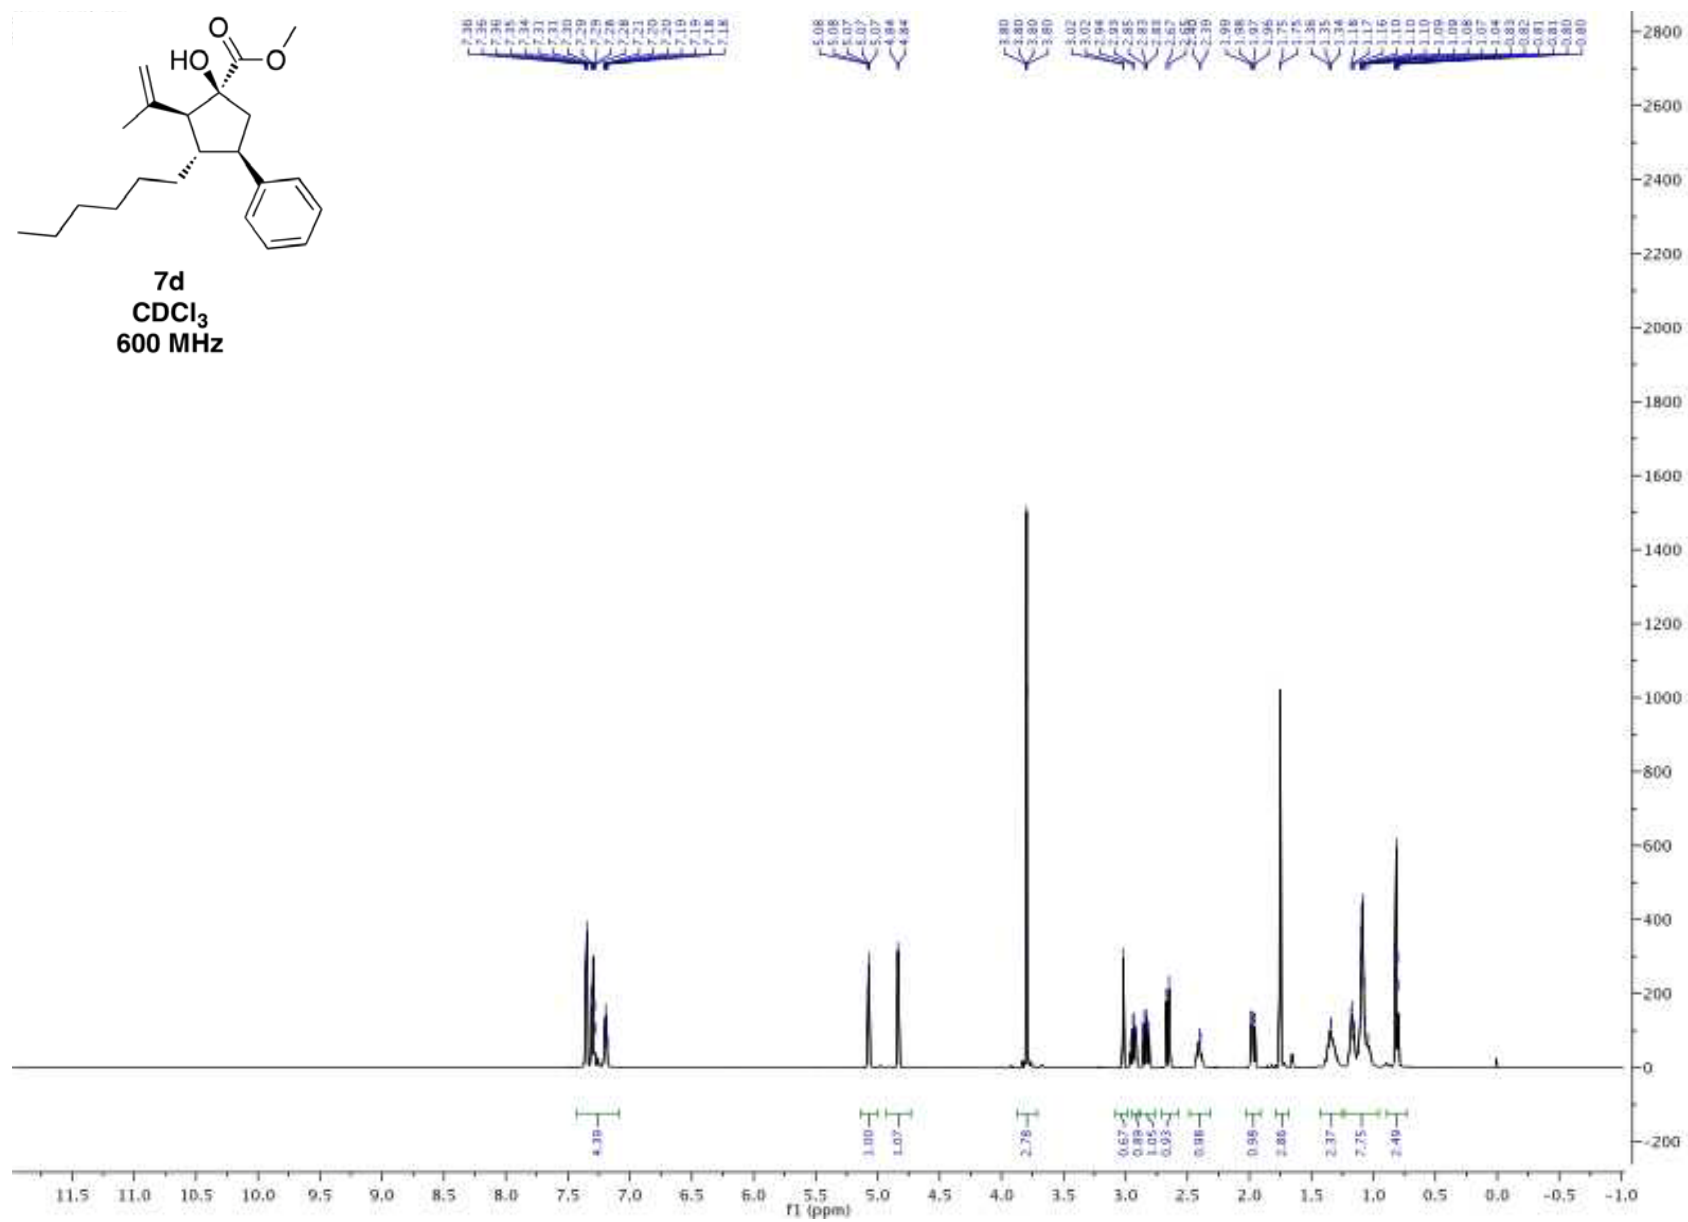

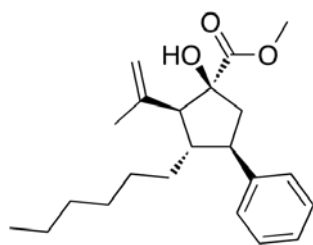

**7d**  
**CDCl<sub>3</sub>**  
**150 MHz**

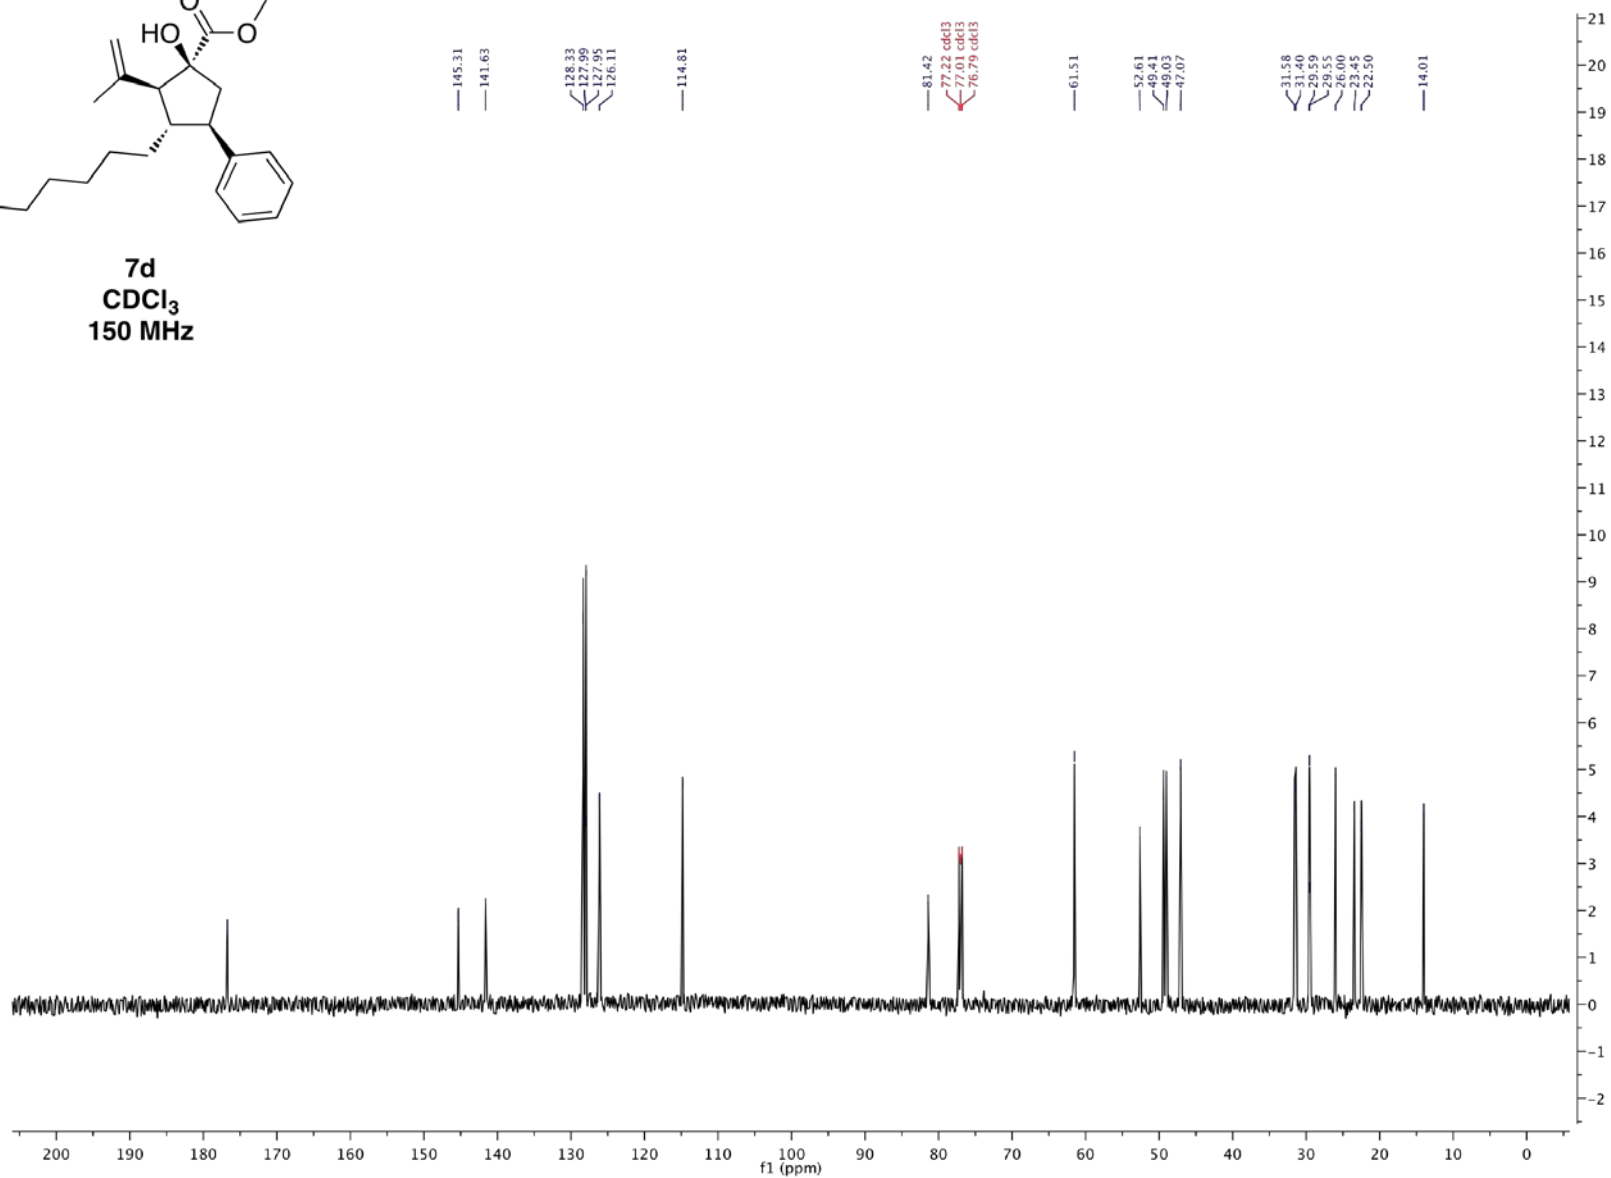

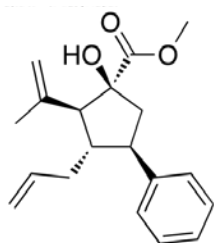

**7e**  
**CDCl<sub>3</sub>**  
**600 MHz**

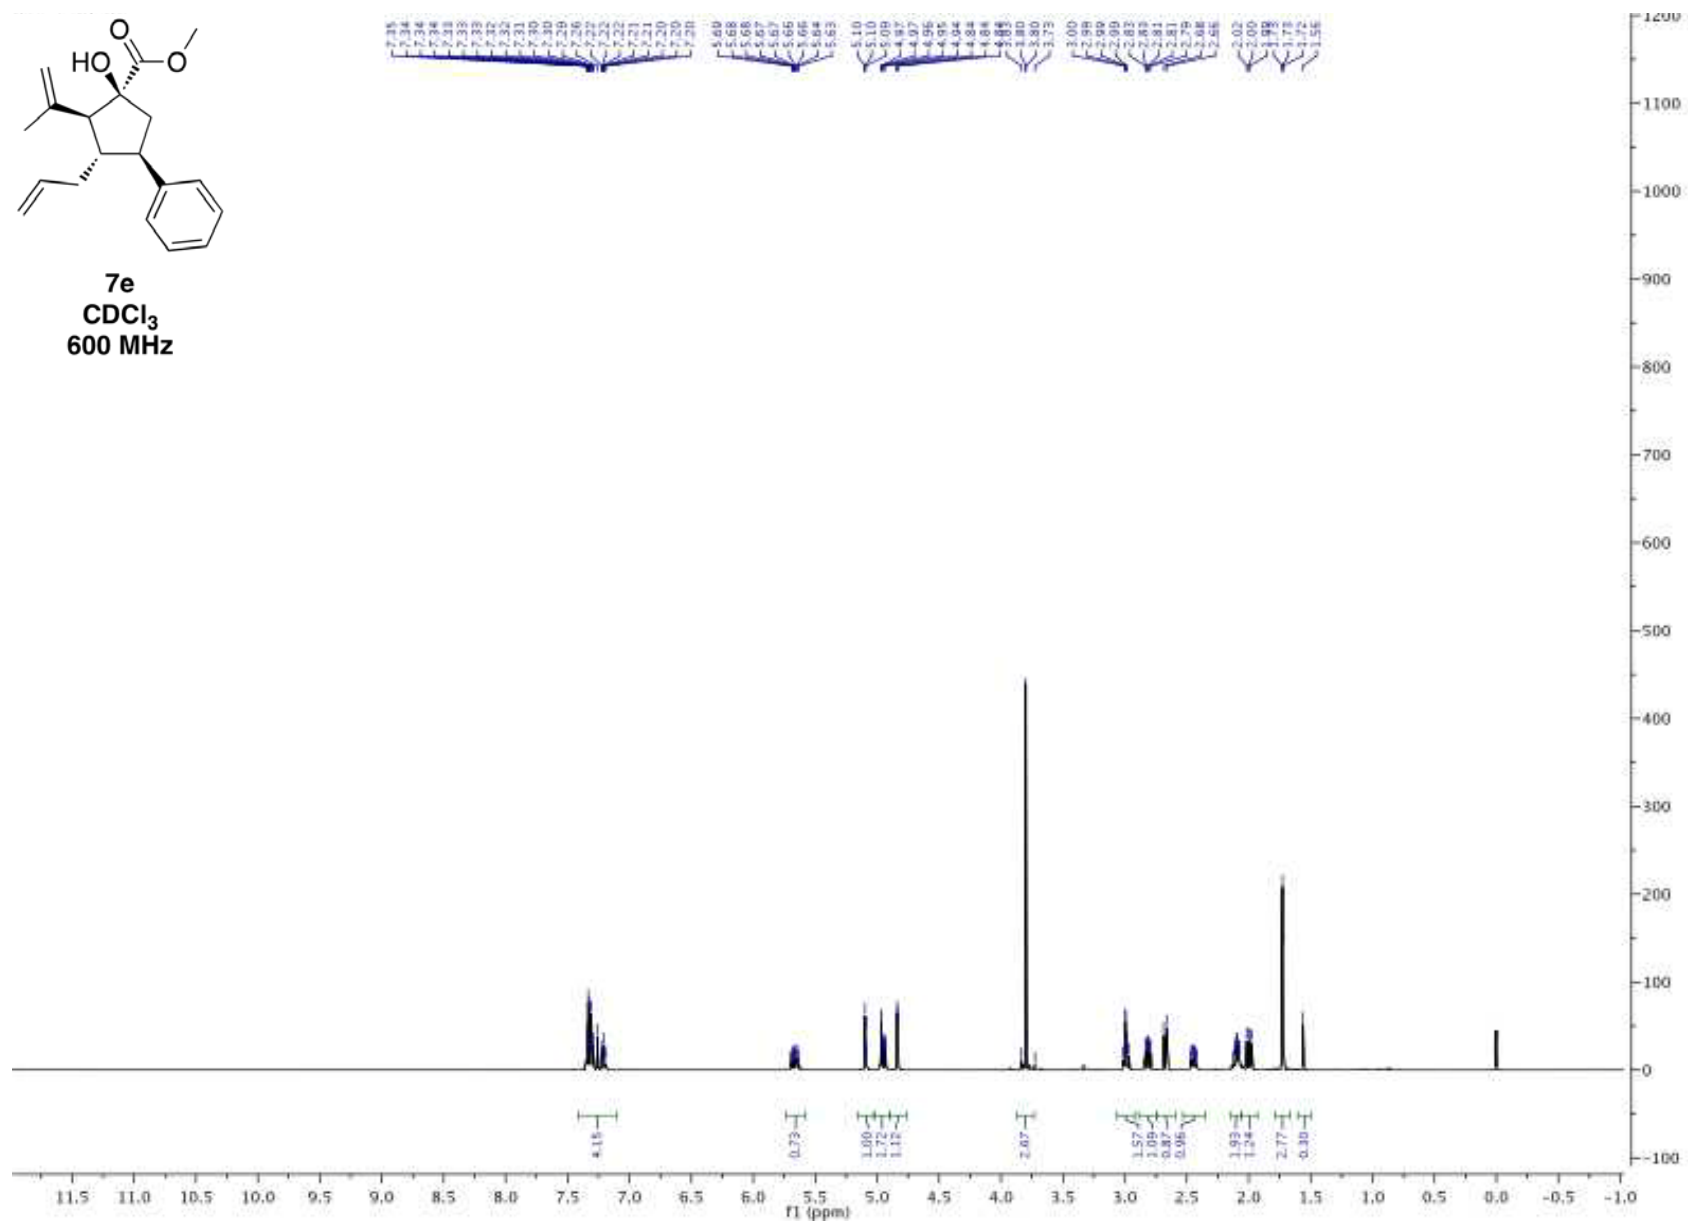

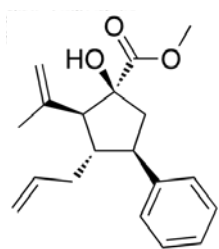

**7e**  
**CDCl<sub>3</sub>**  
**100 MHz**

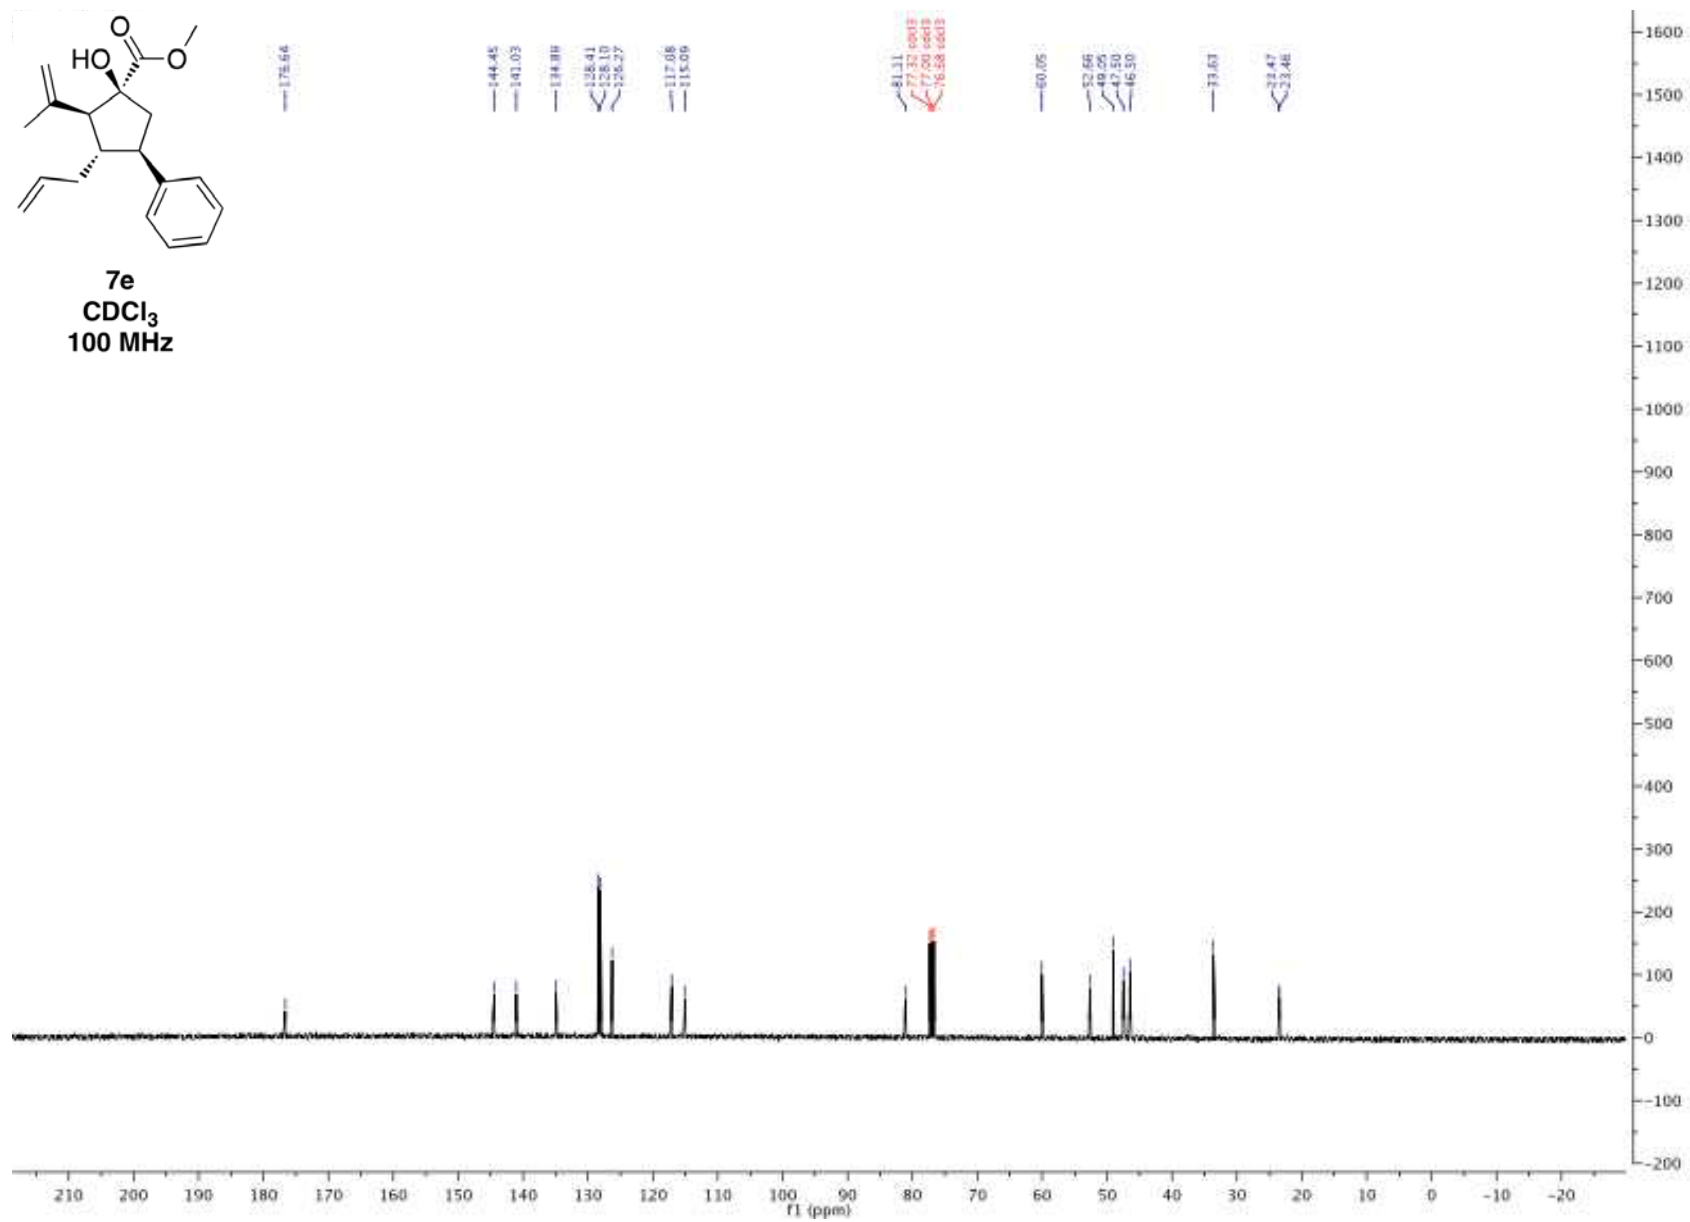





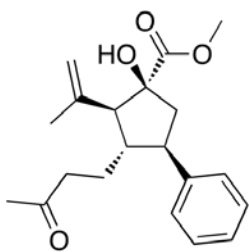

**7f**  
**CDCl<sub>3</sub>**  
**150 MHz**

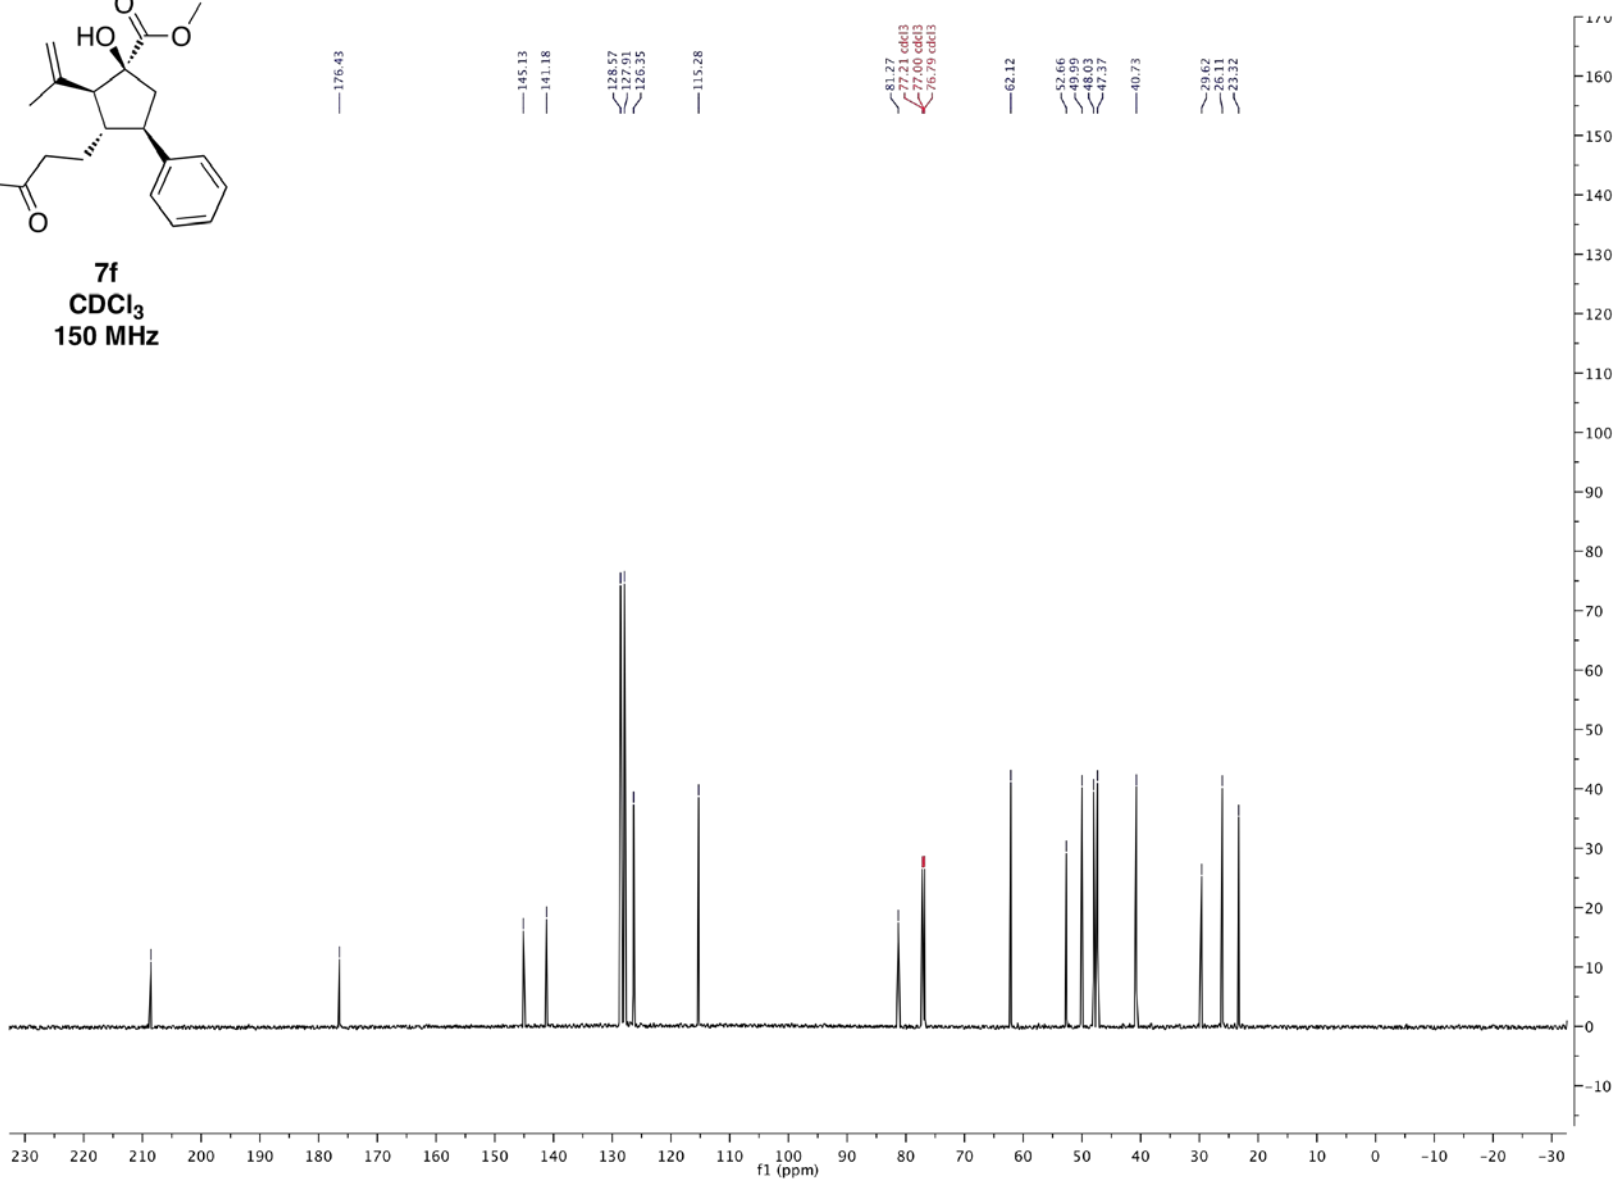



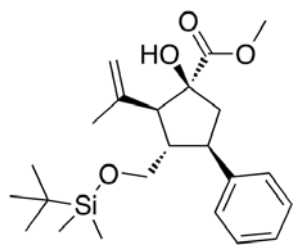

**7g**  
**CDCl<sub>3</sub>**  
**150 MHz**

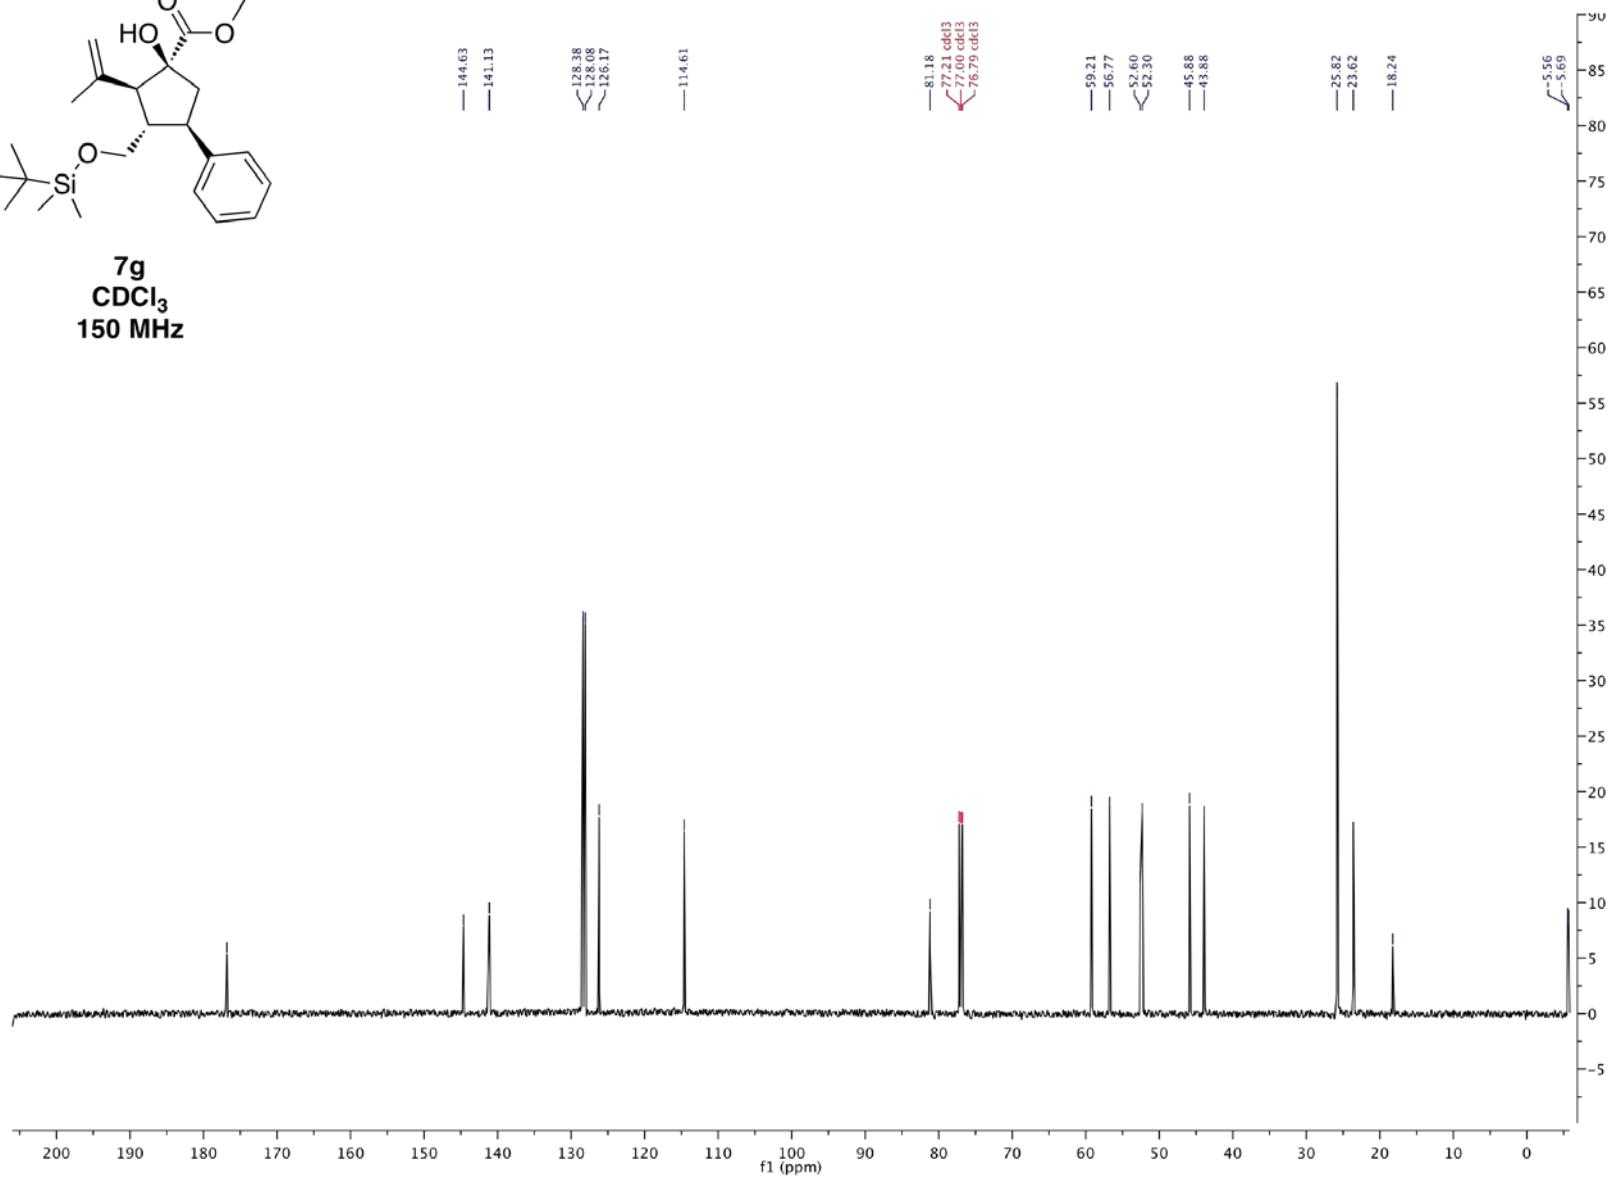

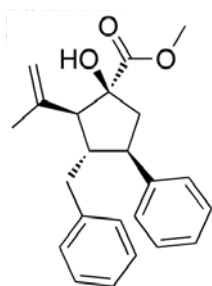

**7h**  
**CDCl<sub>3</sub>**  
**600 MHz**

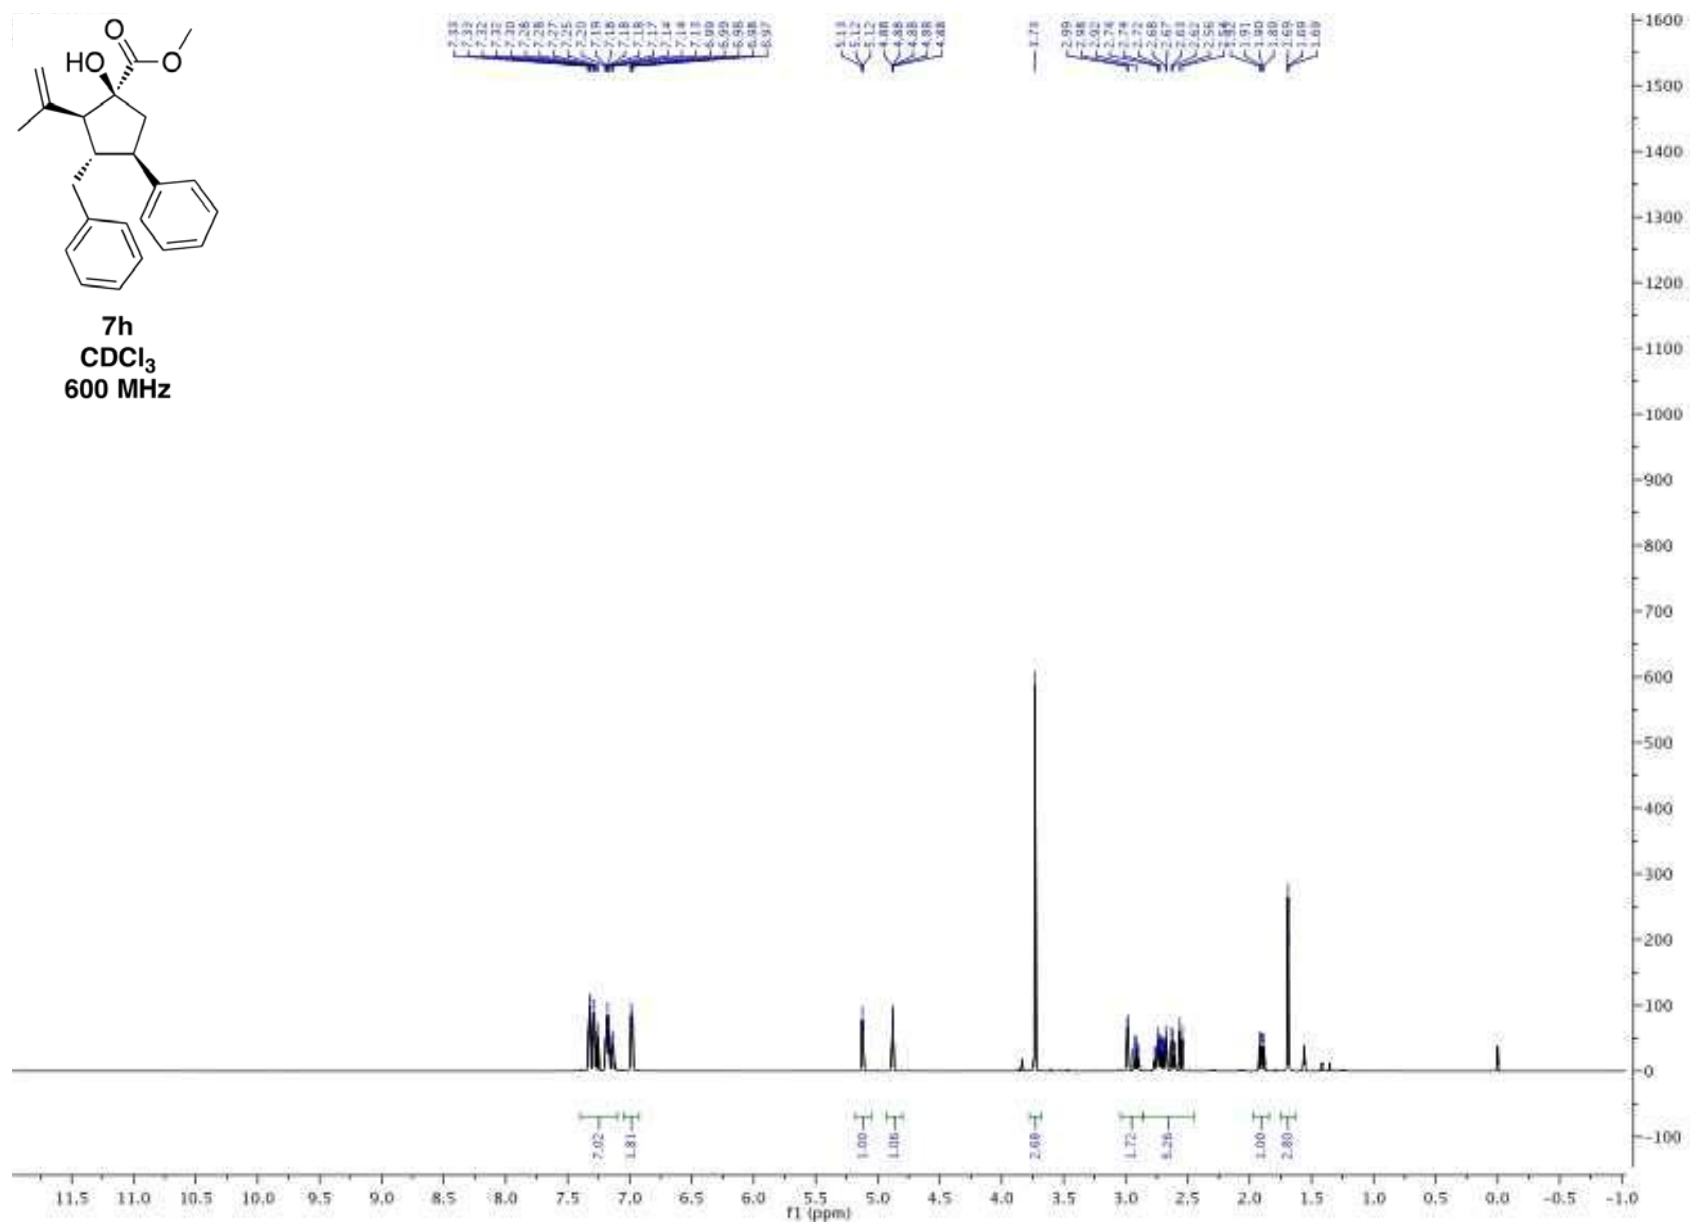

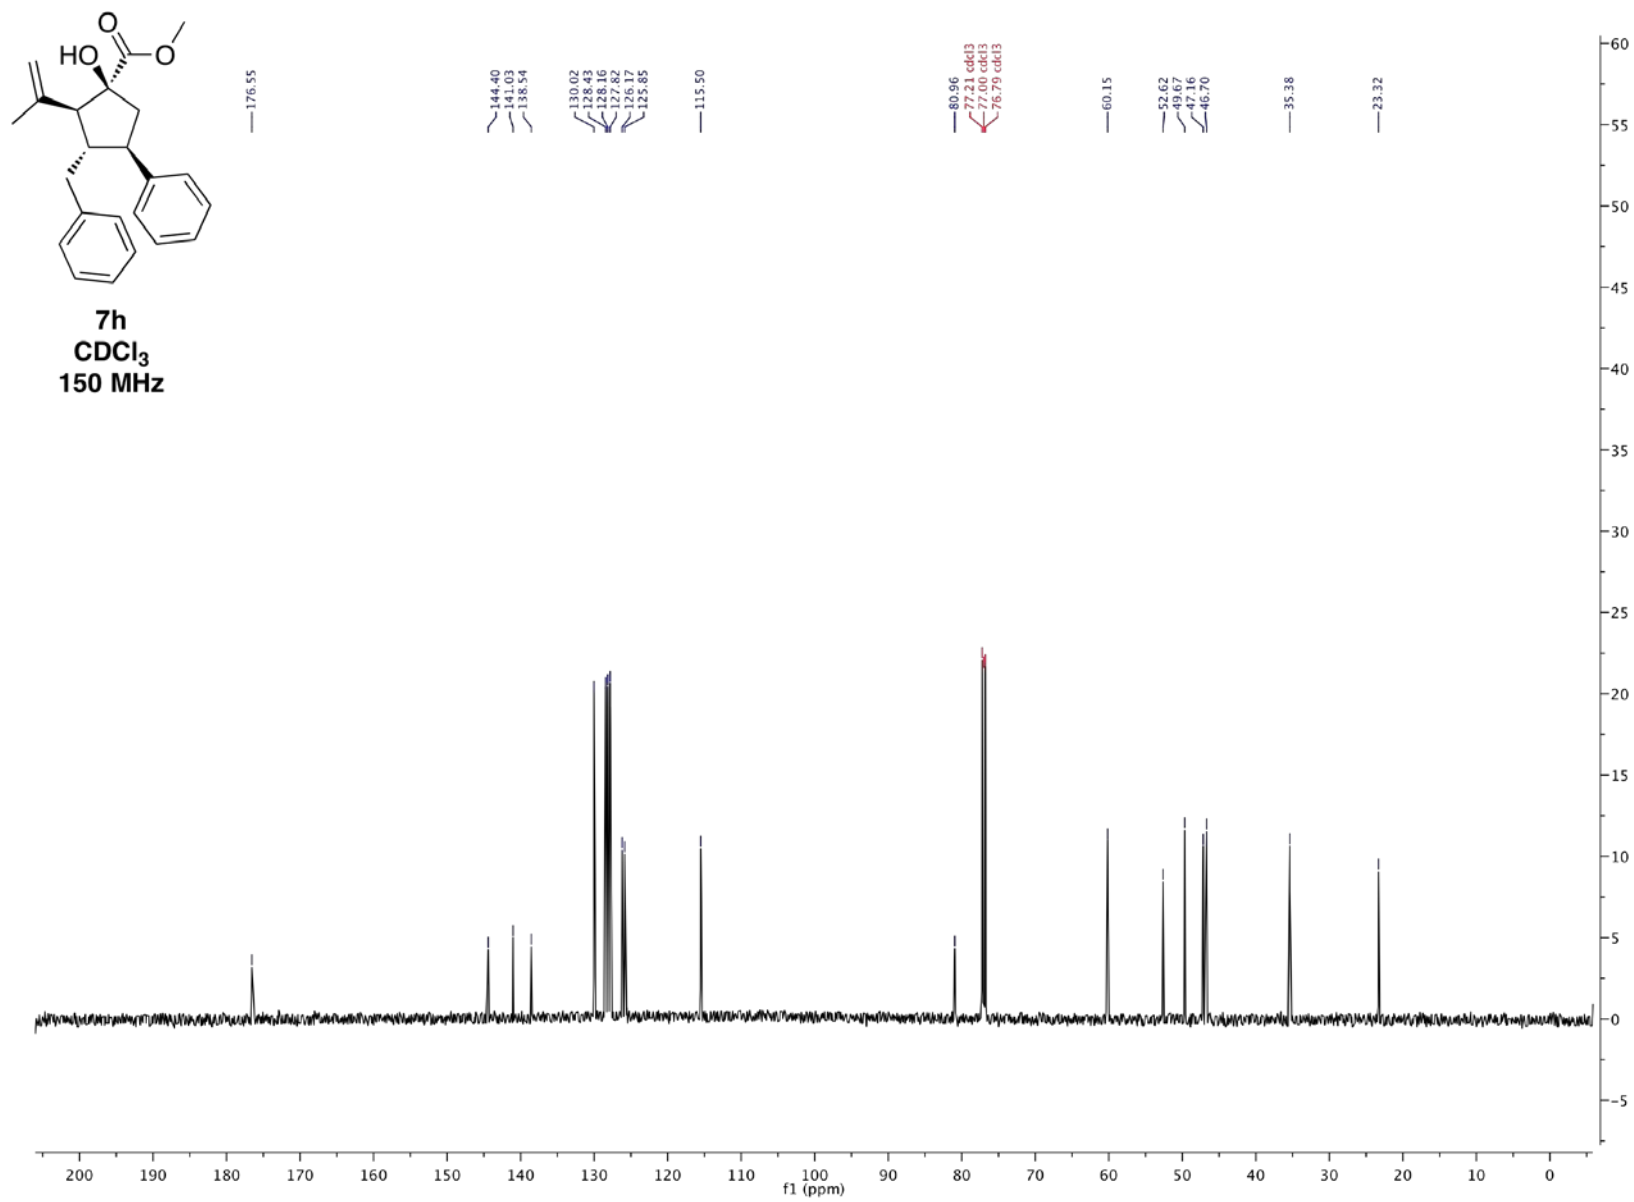

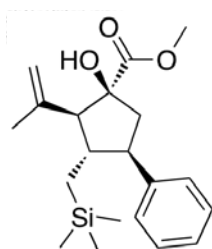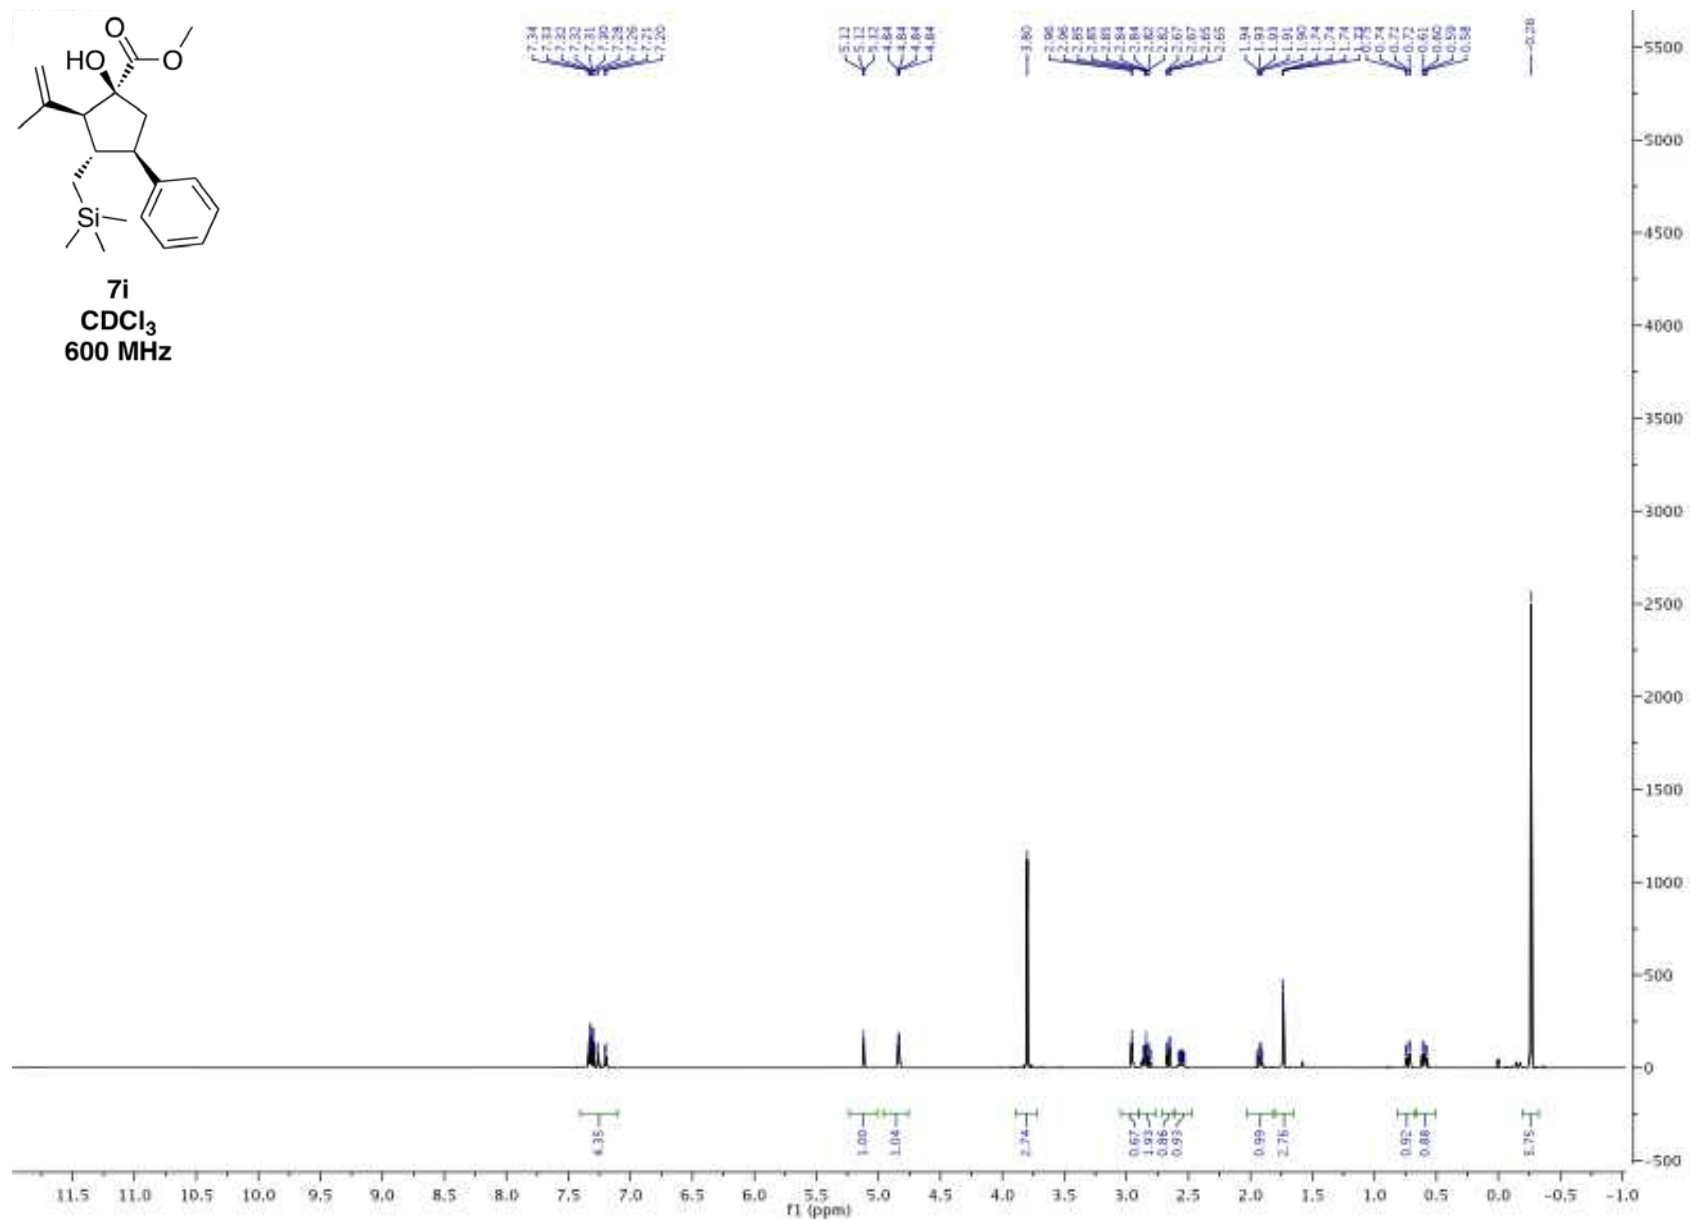

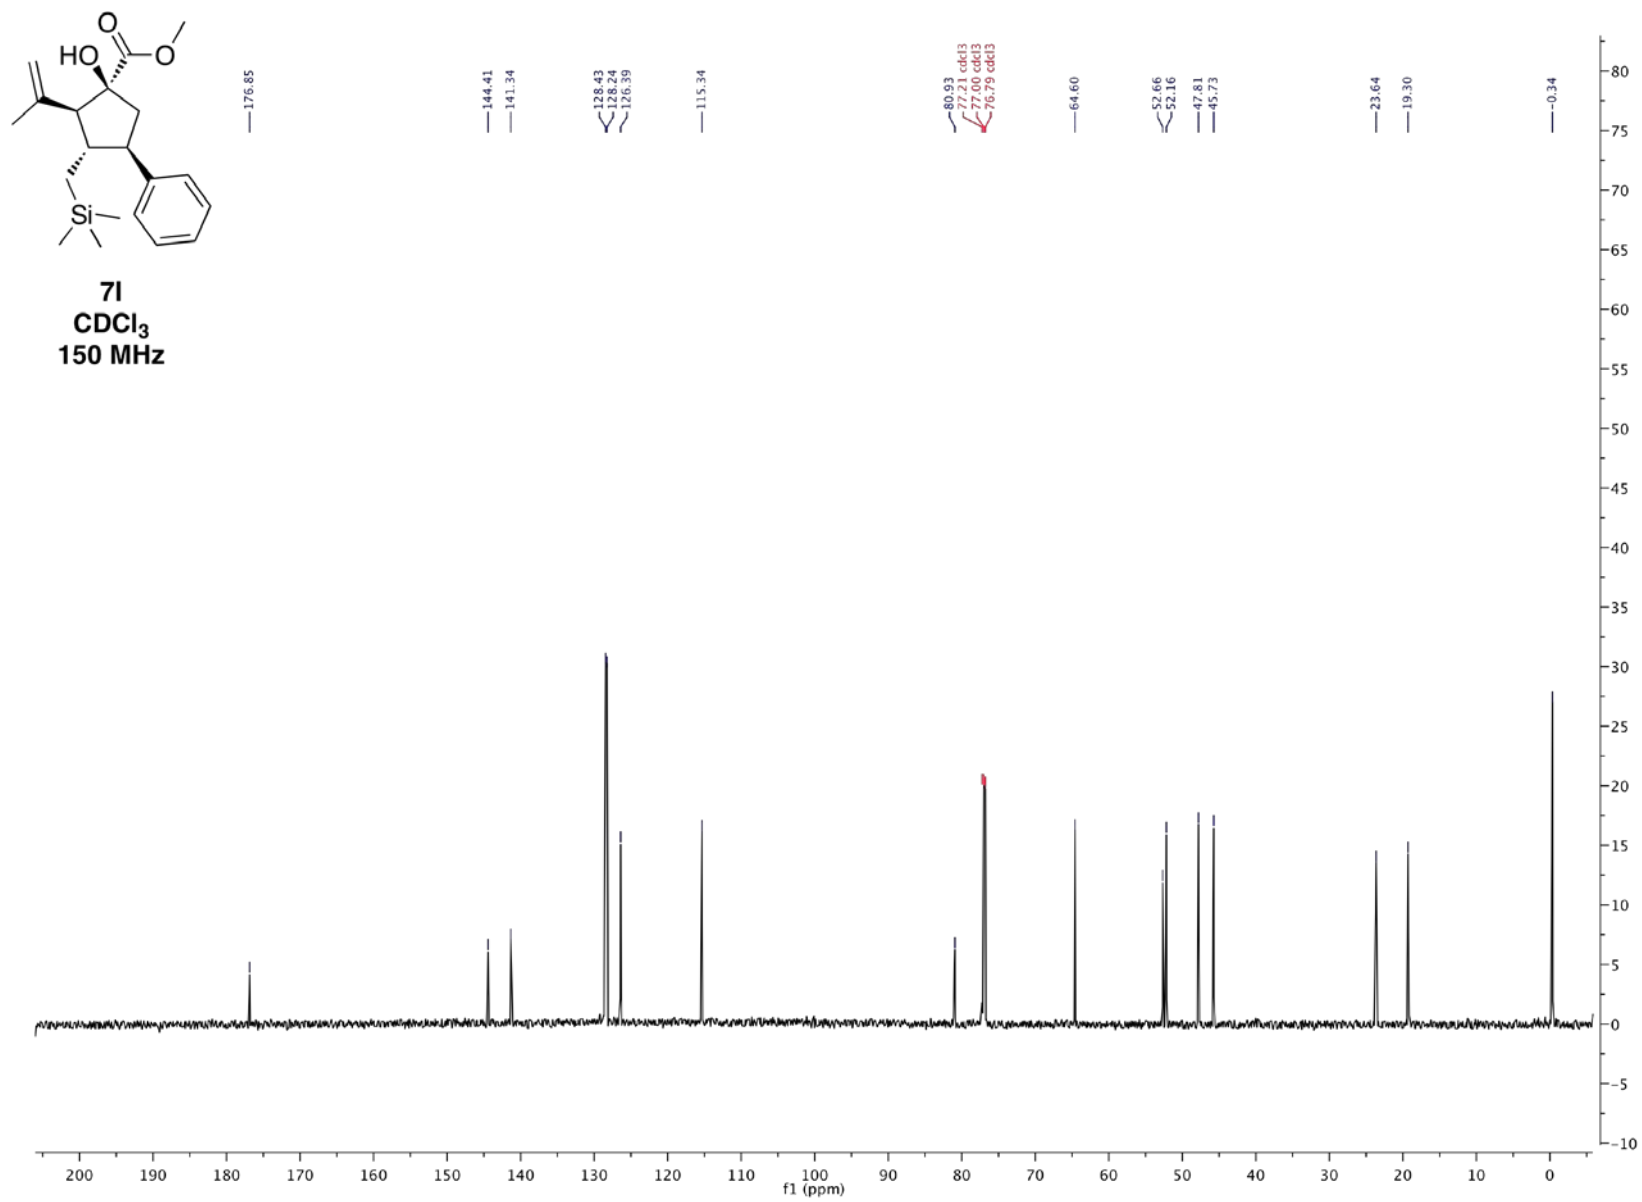



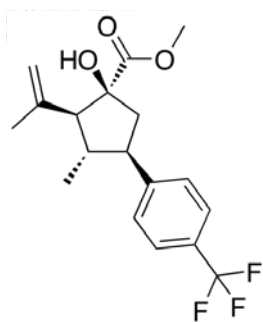

**9a**  
 CDCl<sub>3</sub>  
 600 MHz

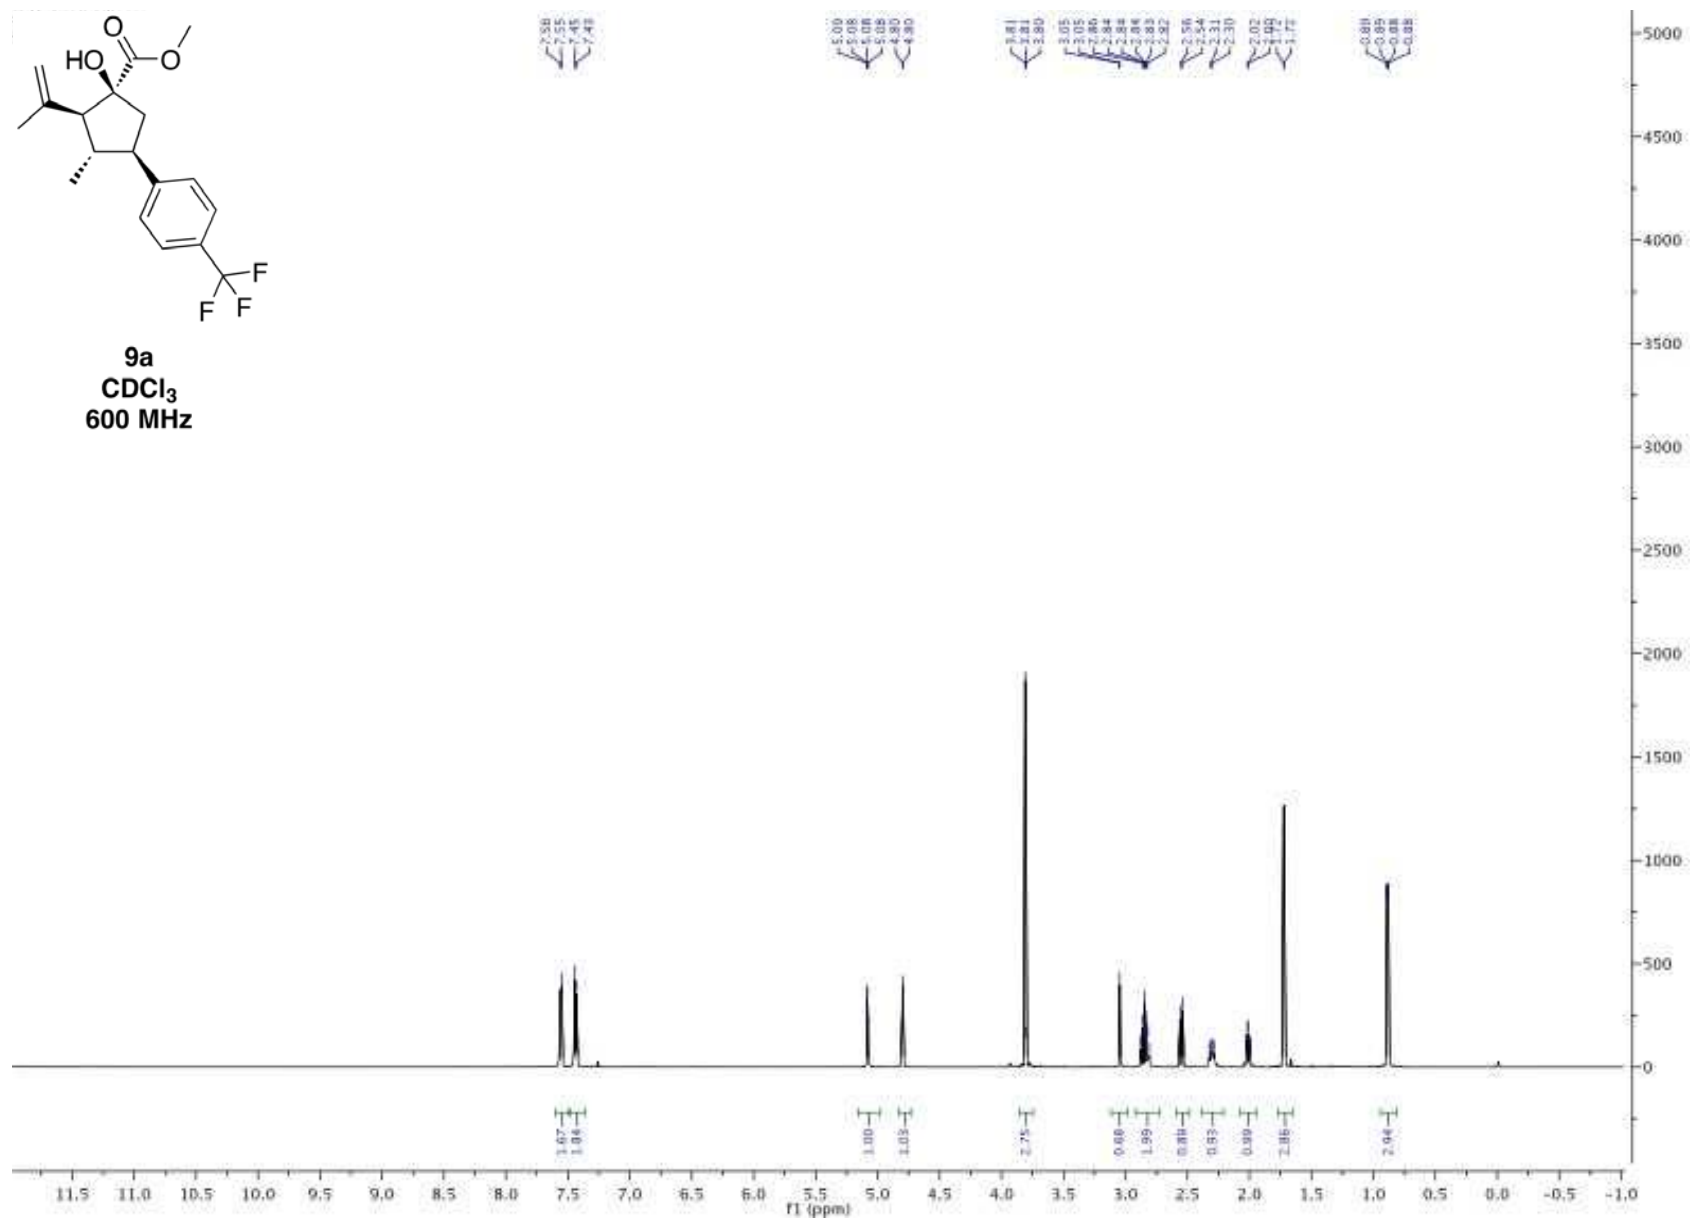

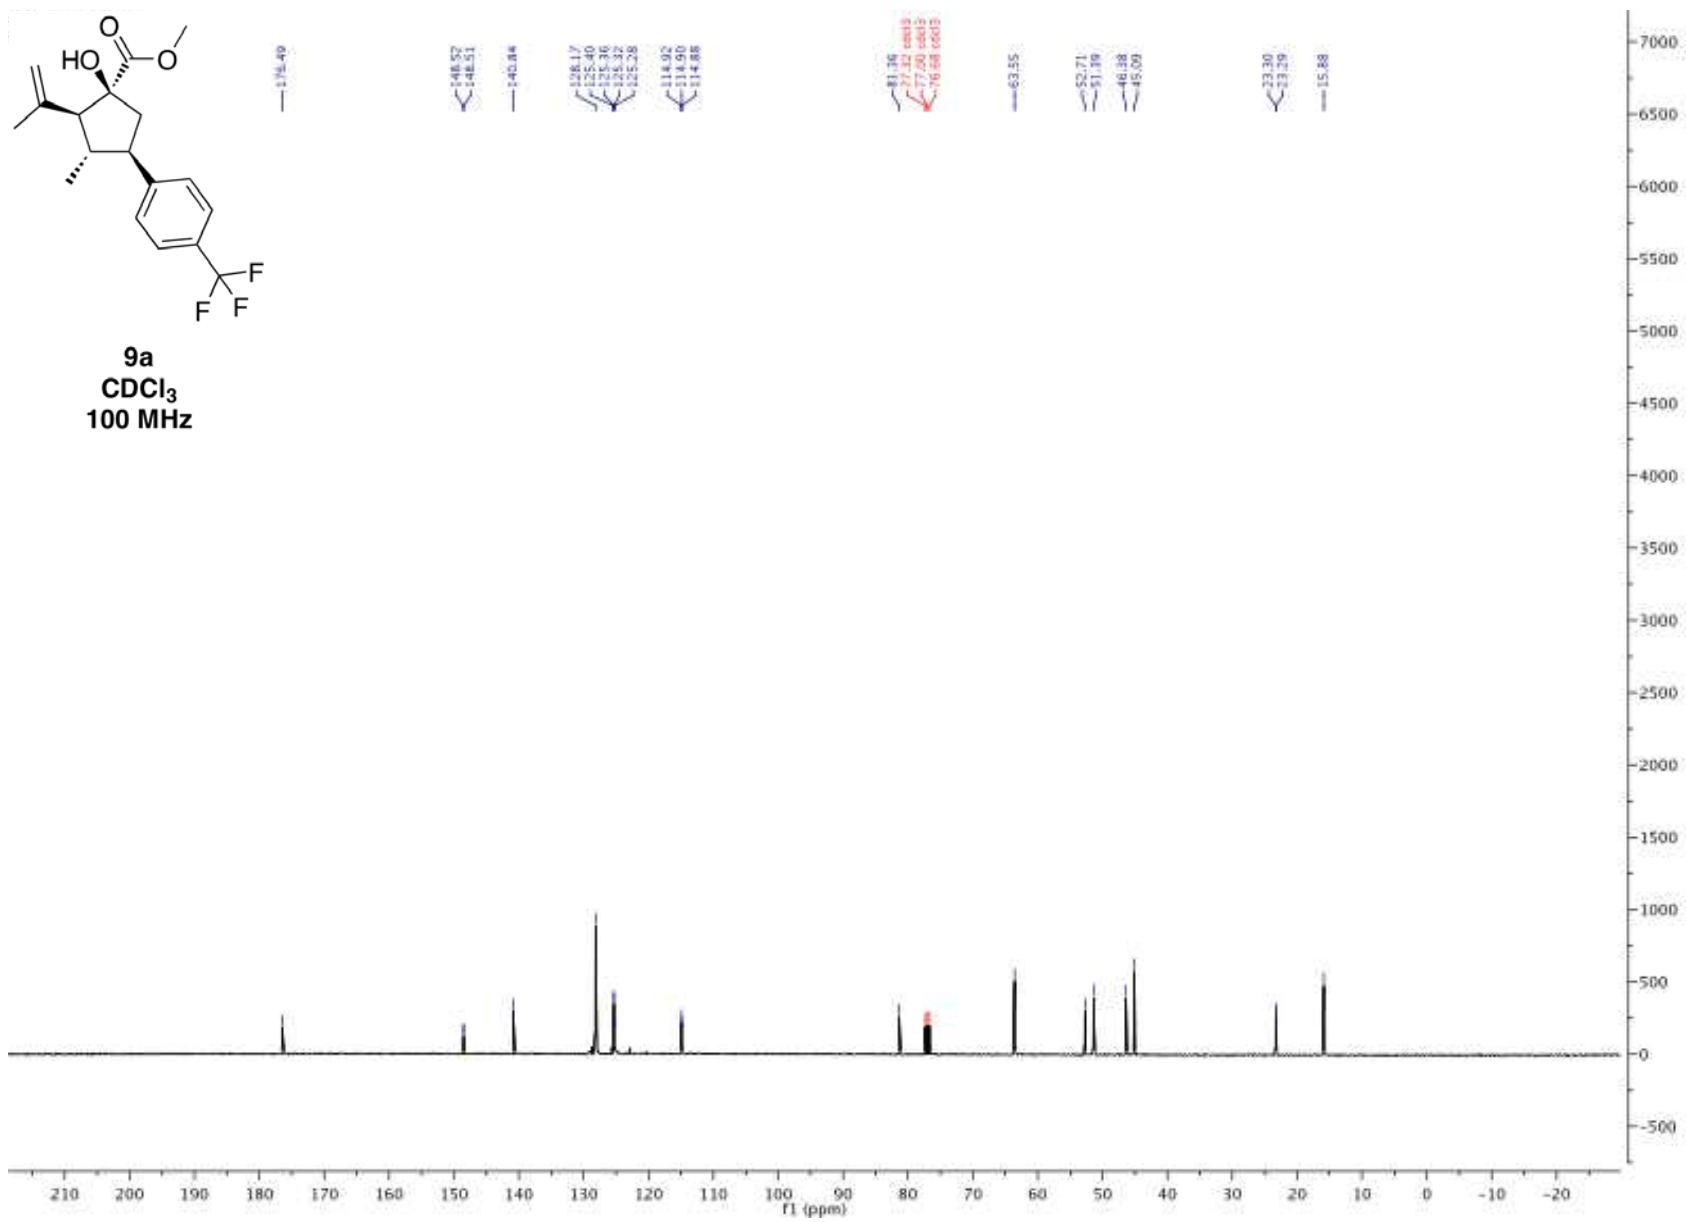

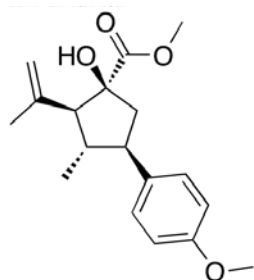

**9b**  
**CDCl<sub>3</sub>**  
**600 MHz**

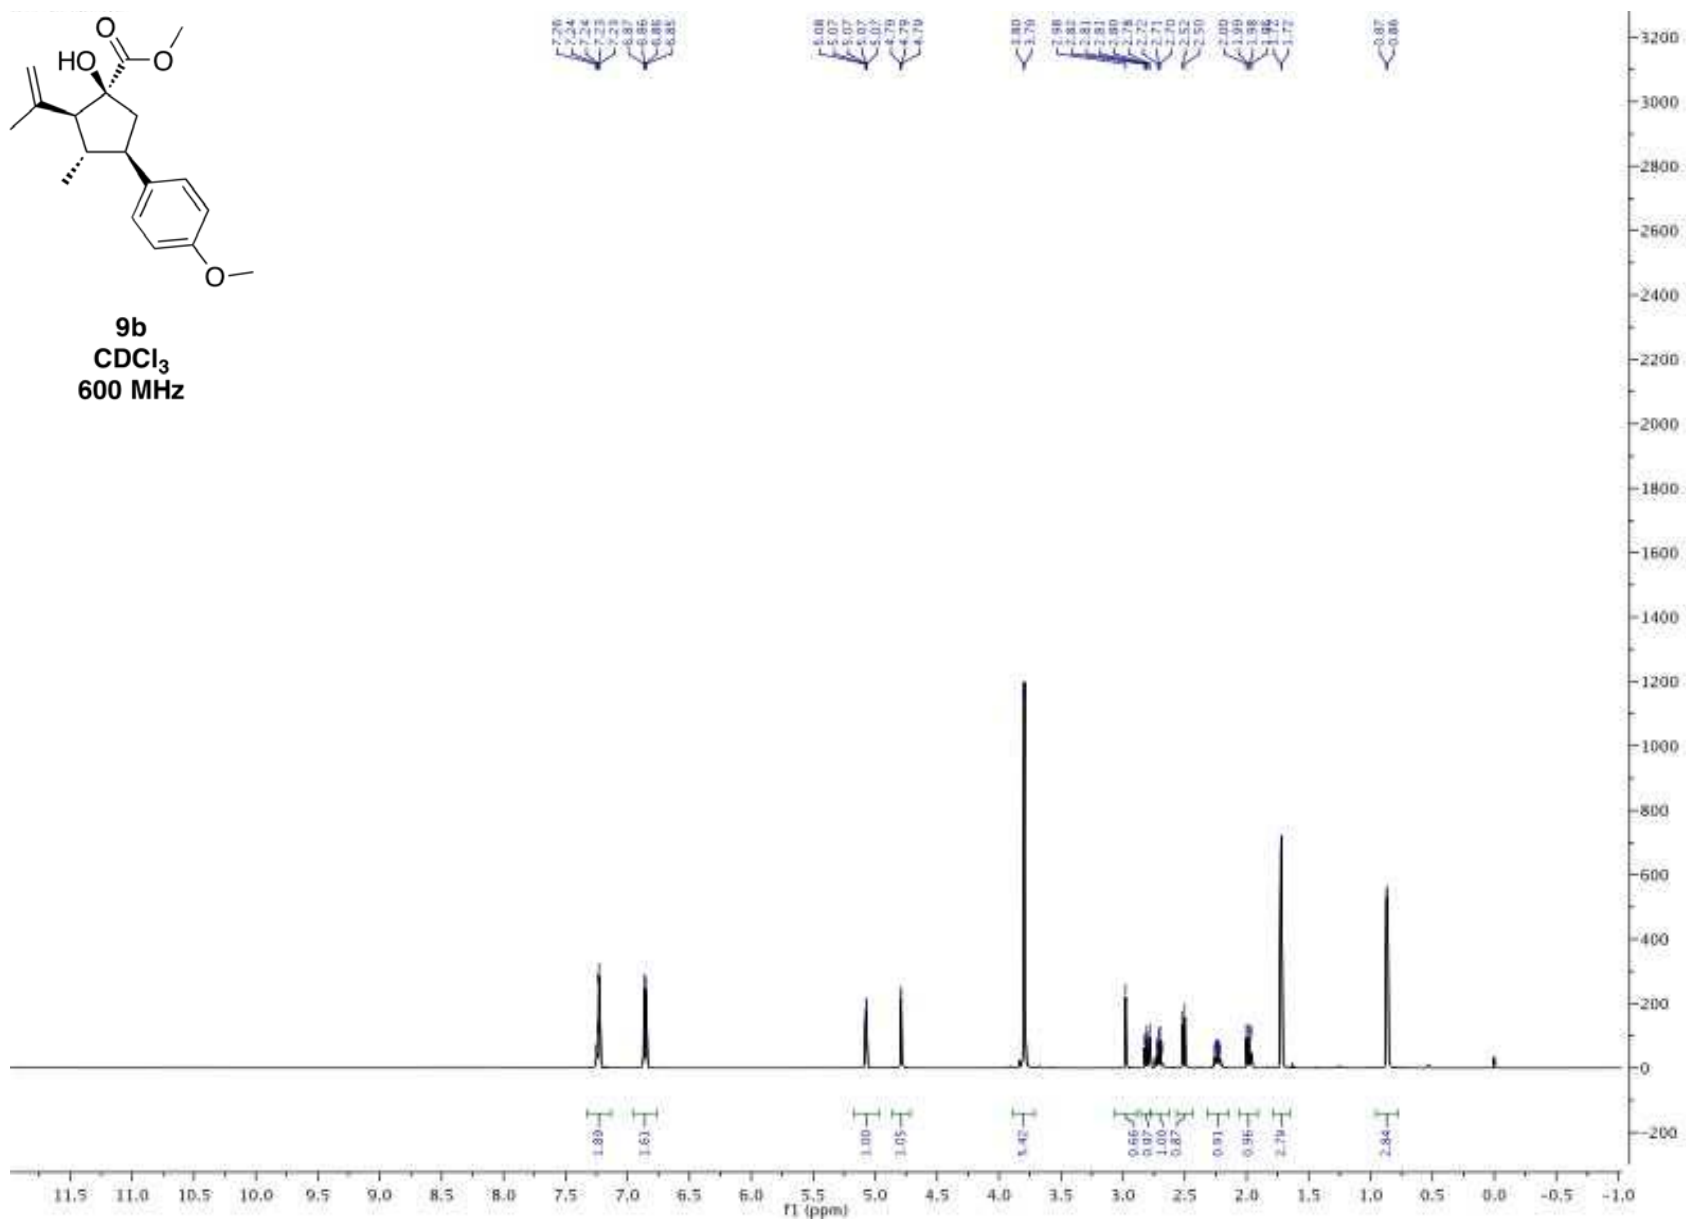

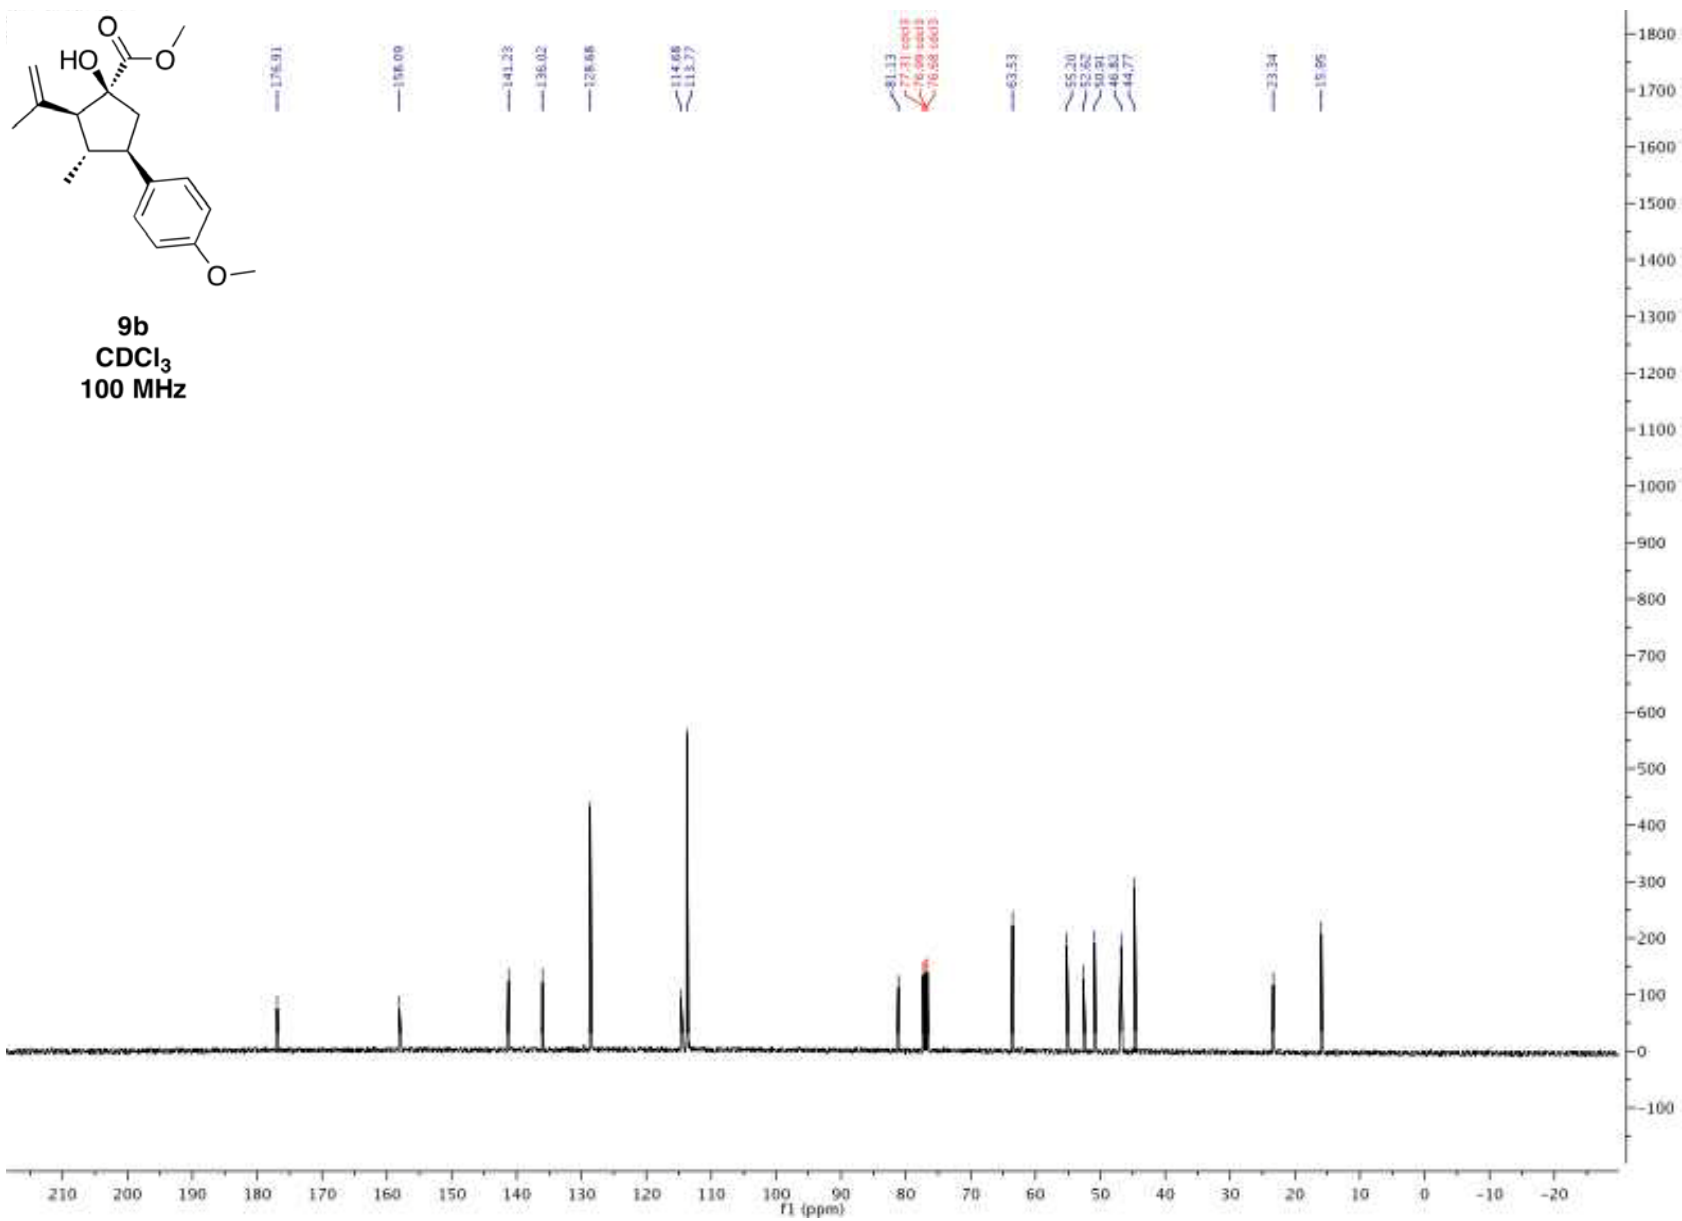

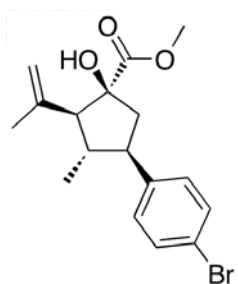

**9c**  
**CDCl<sub>3</sub>**  
**600 MHz**

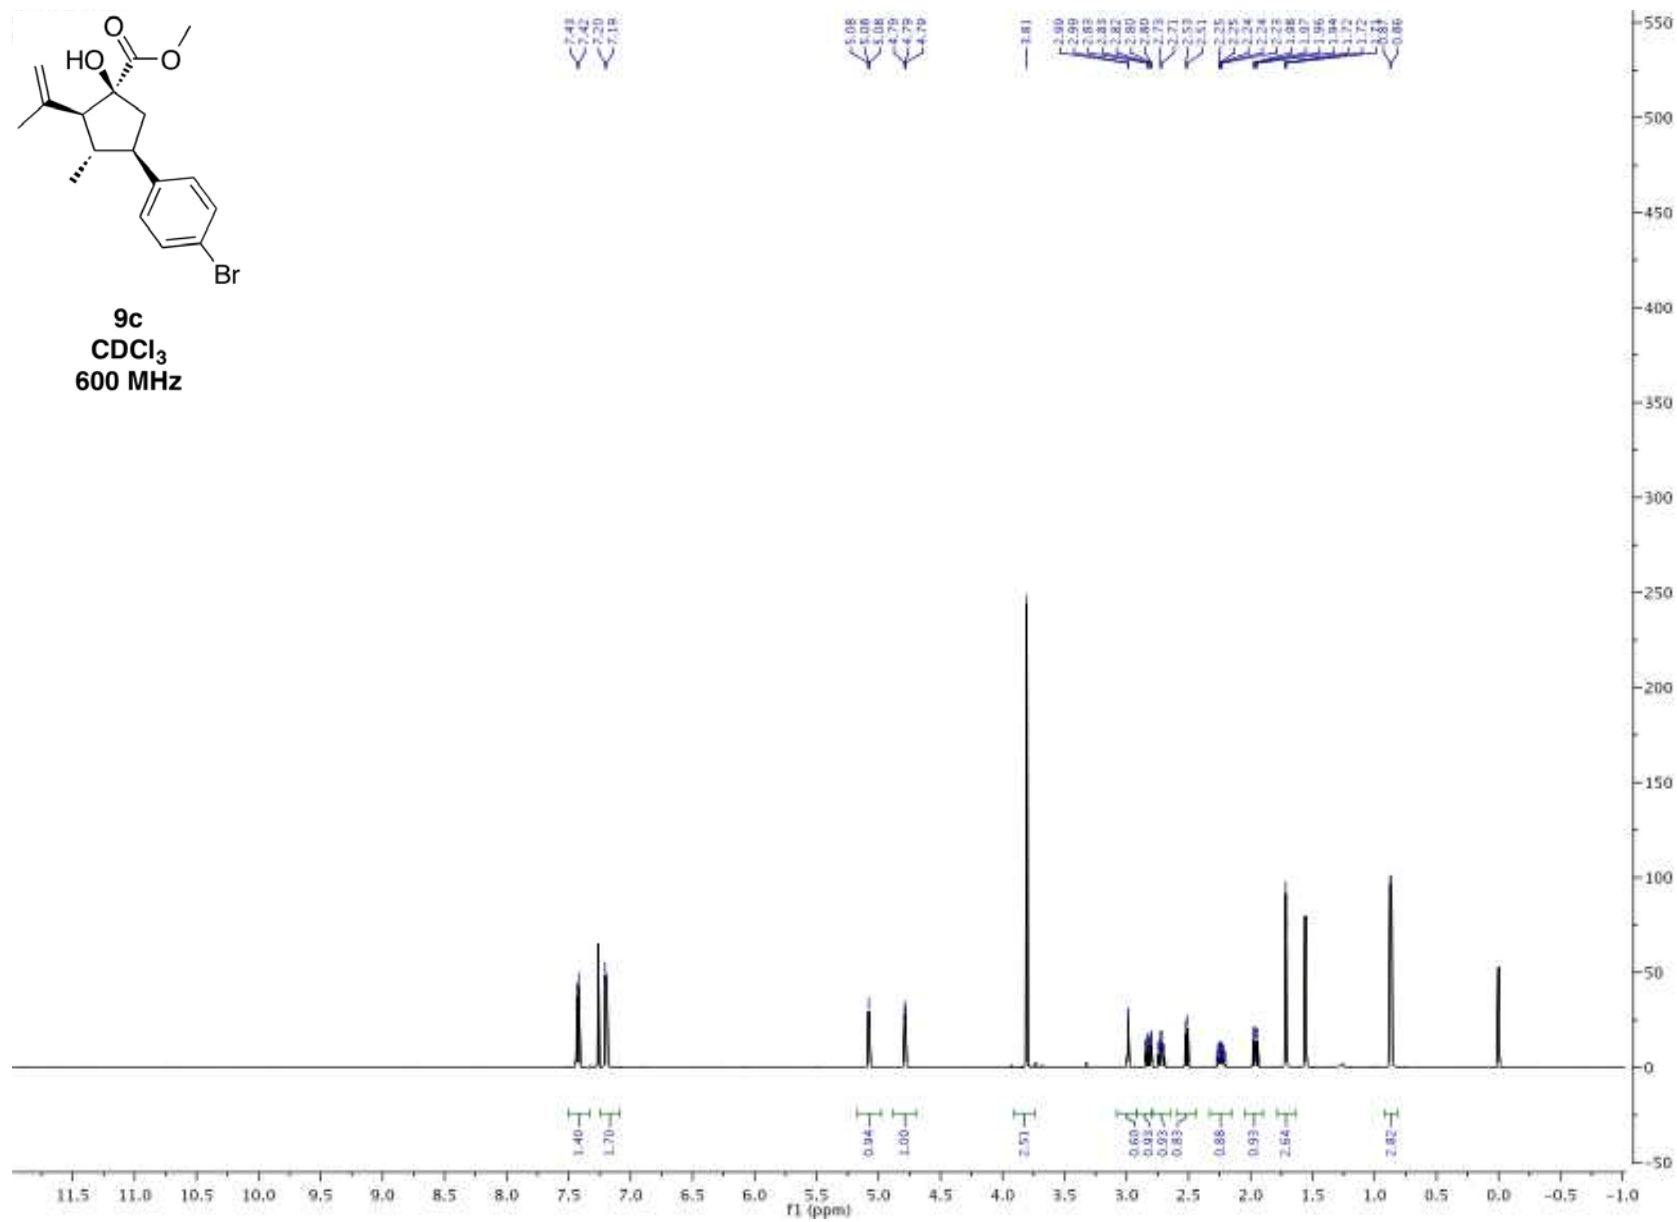

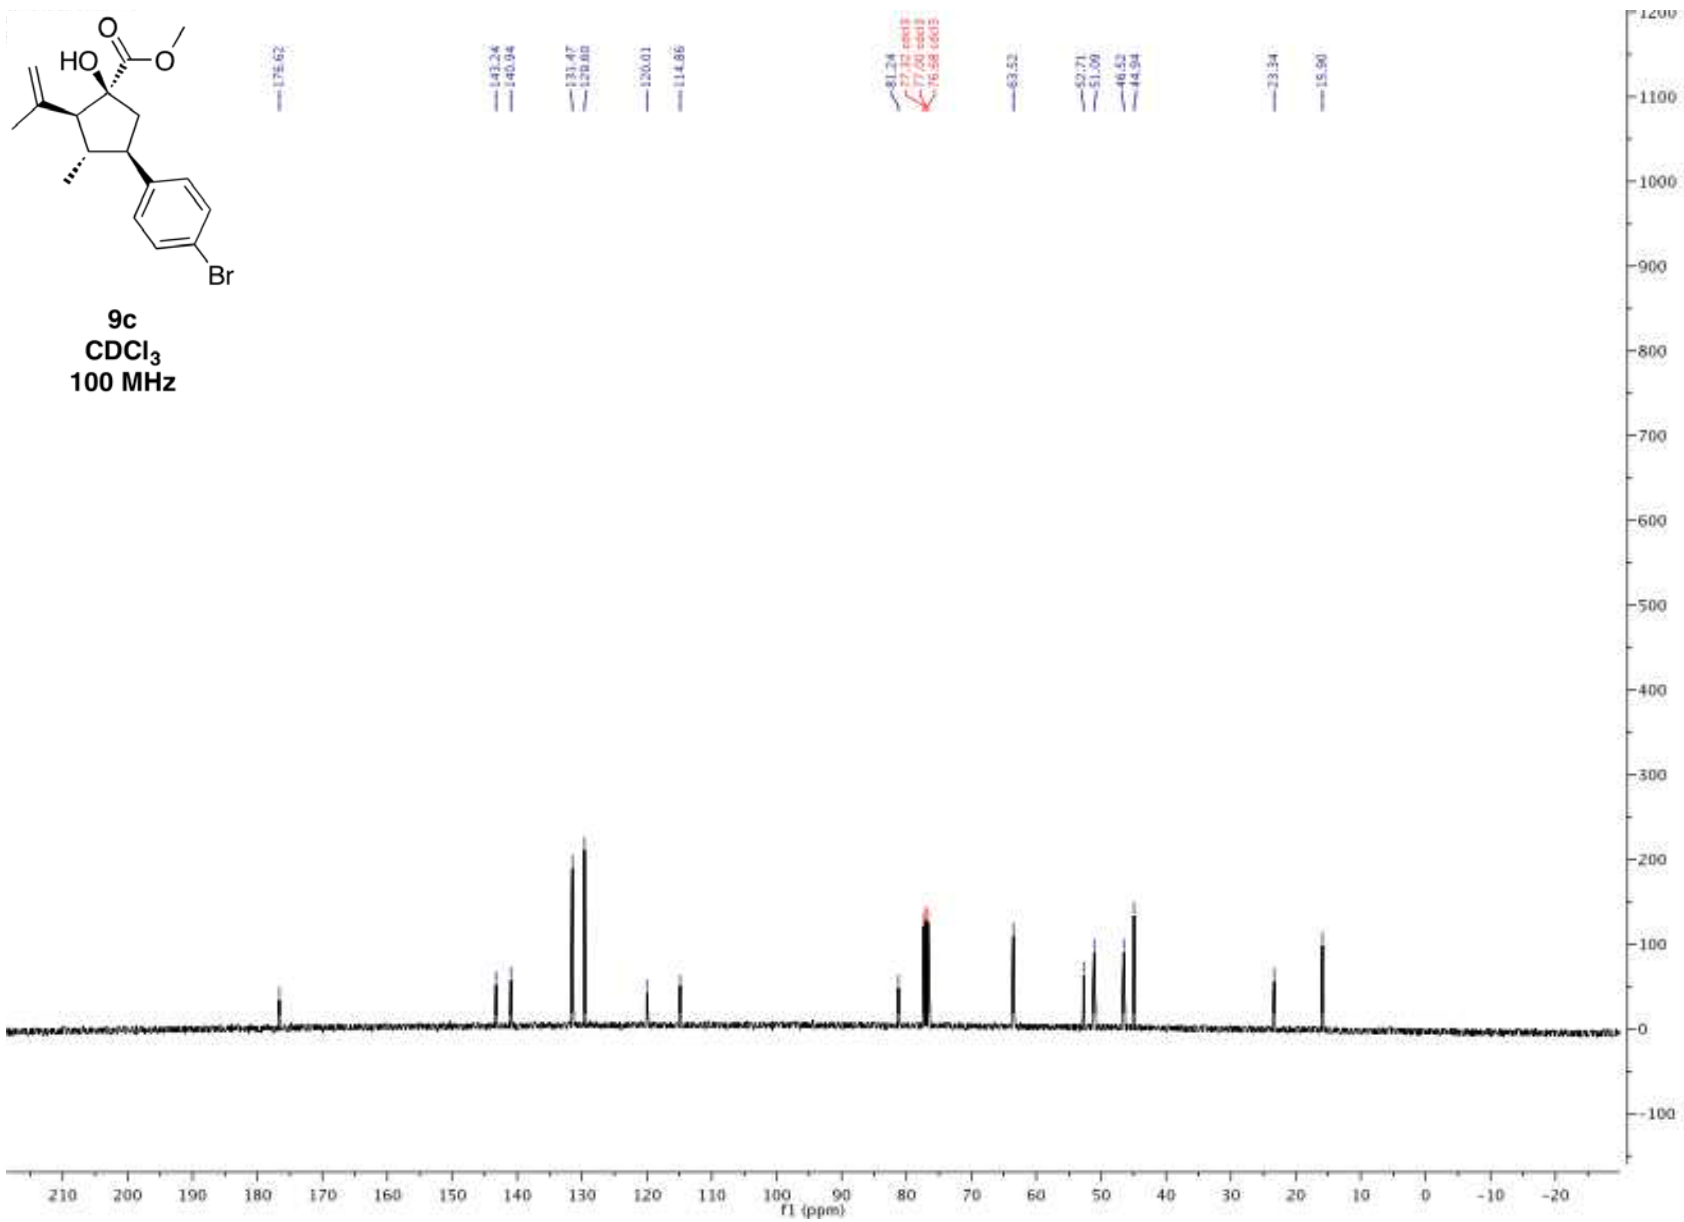

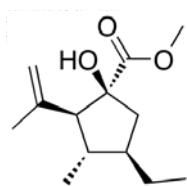

9d  
CDCl<sub>3</sub>  
600 MHz

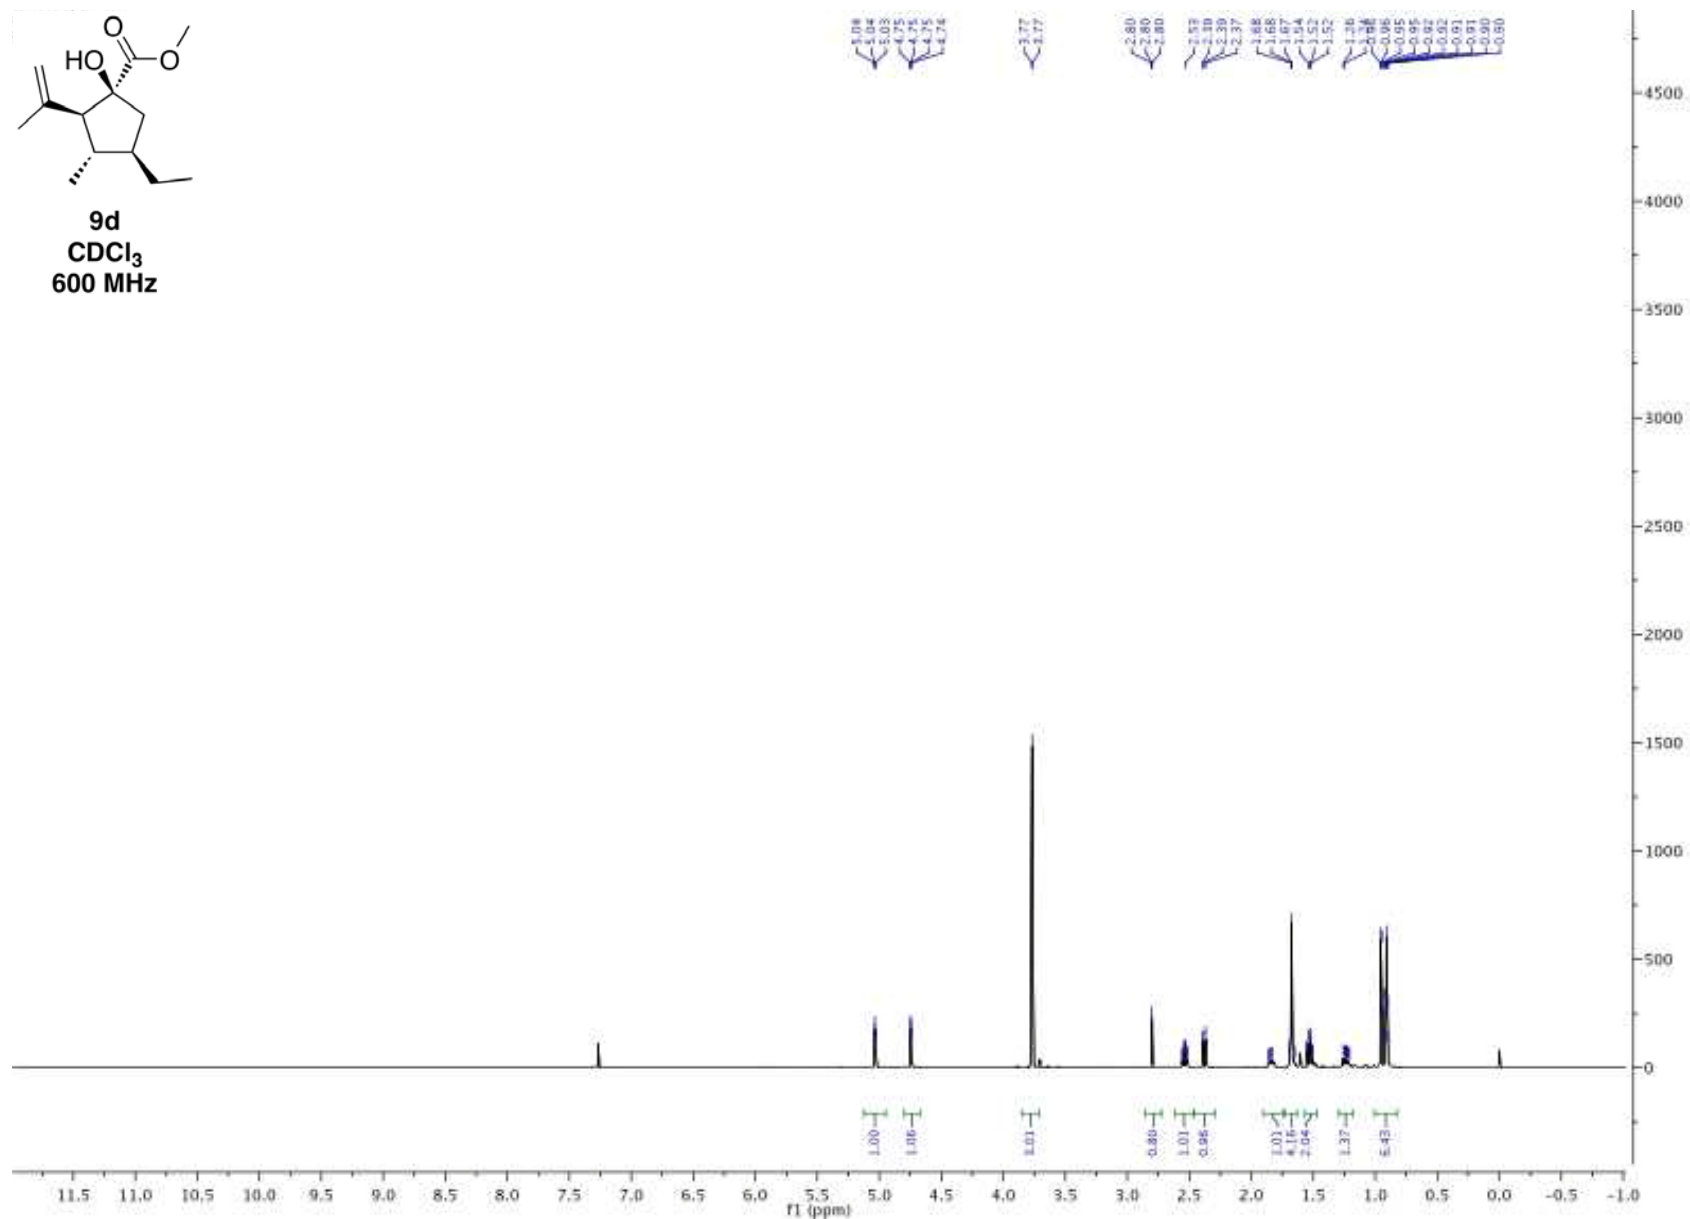

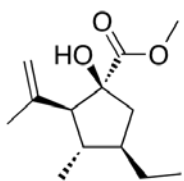

**9d**  
**CDCl<sub>3</sub>**  
**150 MHz**

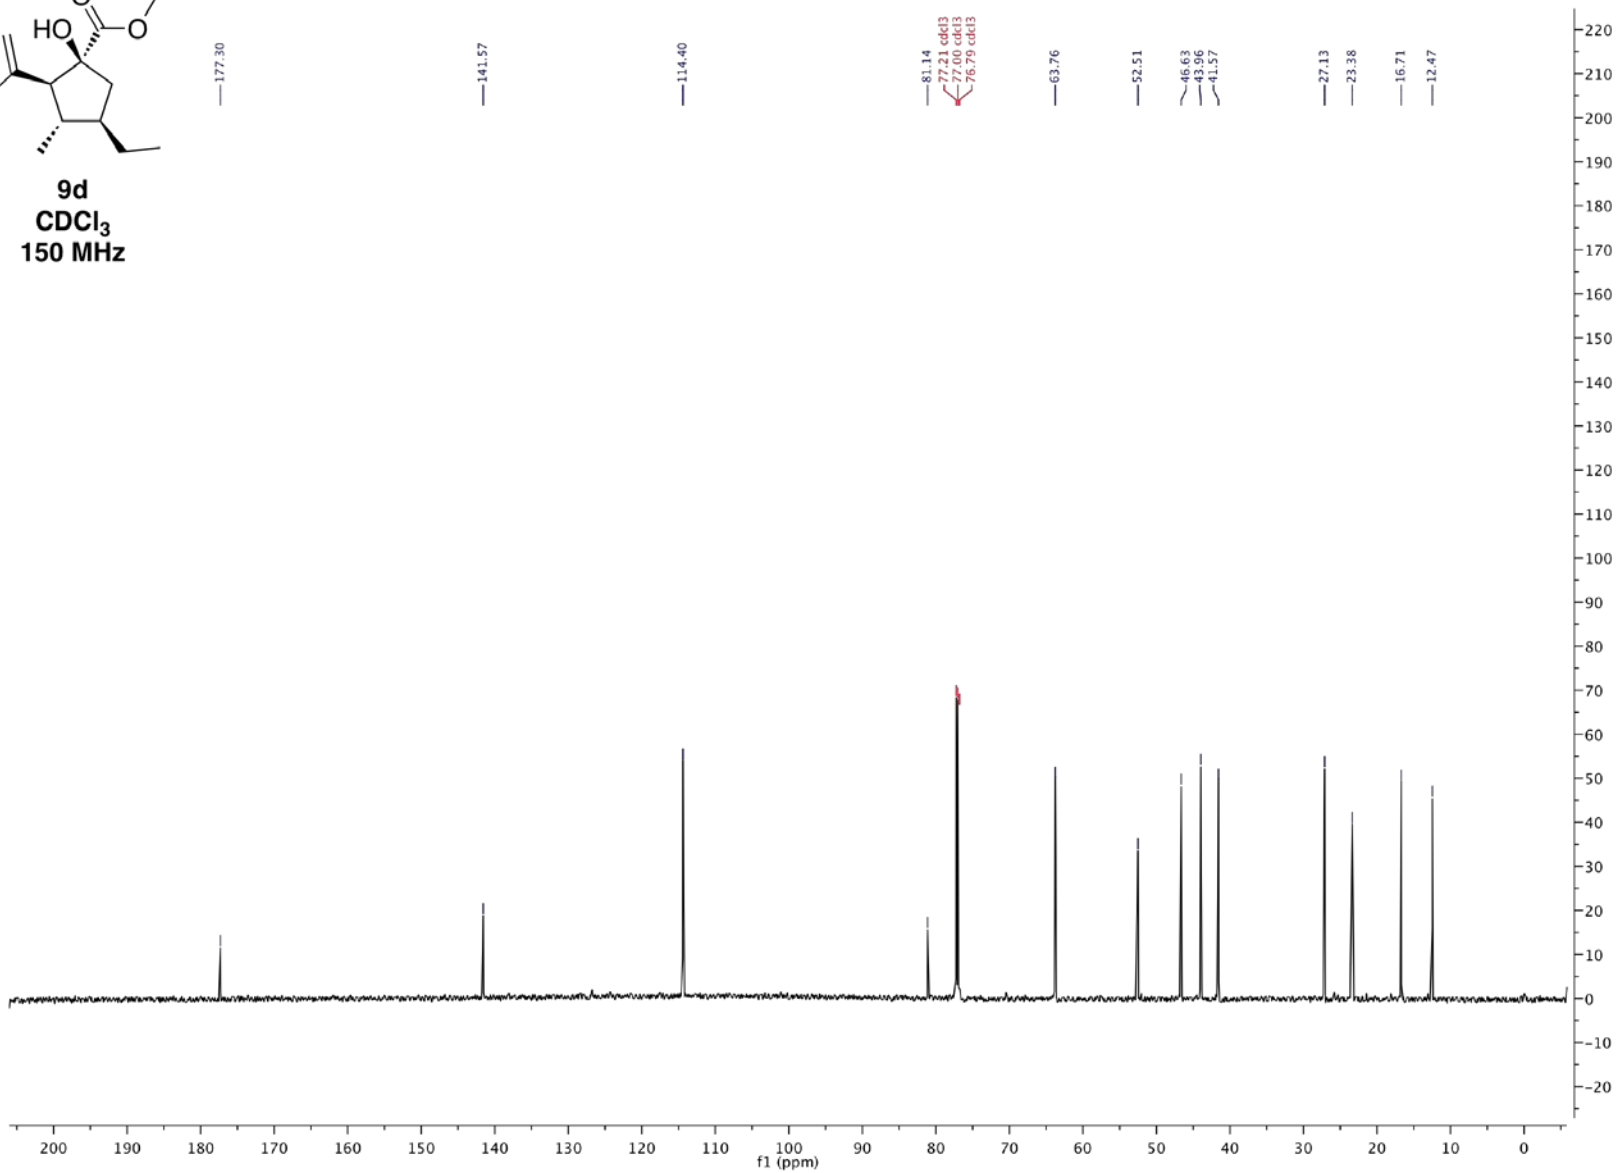



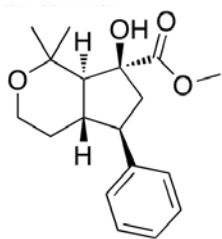

12  
CDCl<sub>3</sub>  
600 MHz

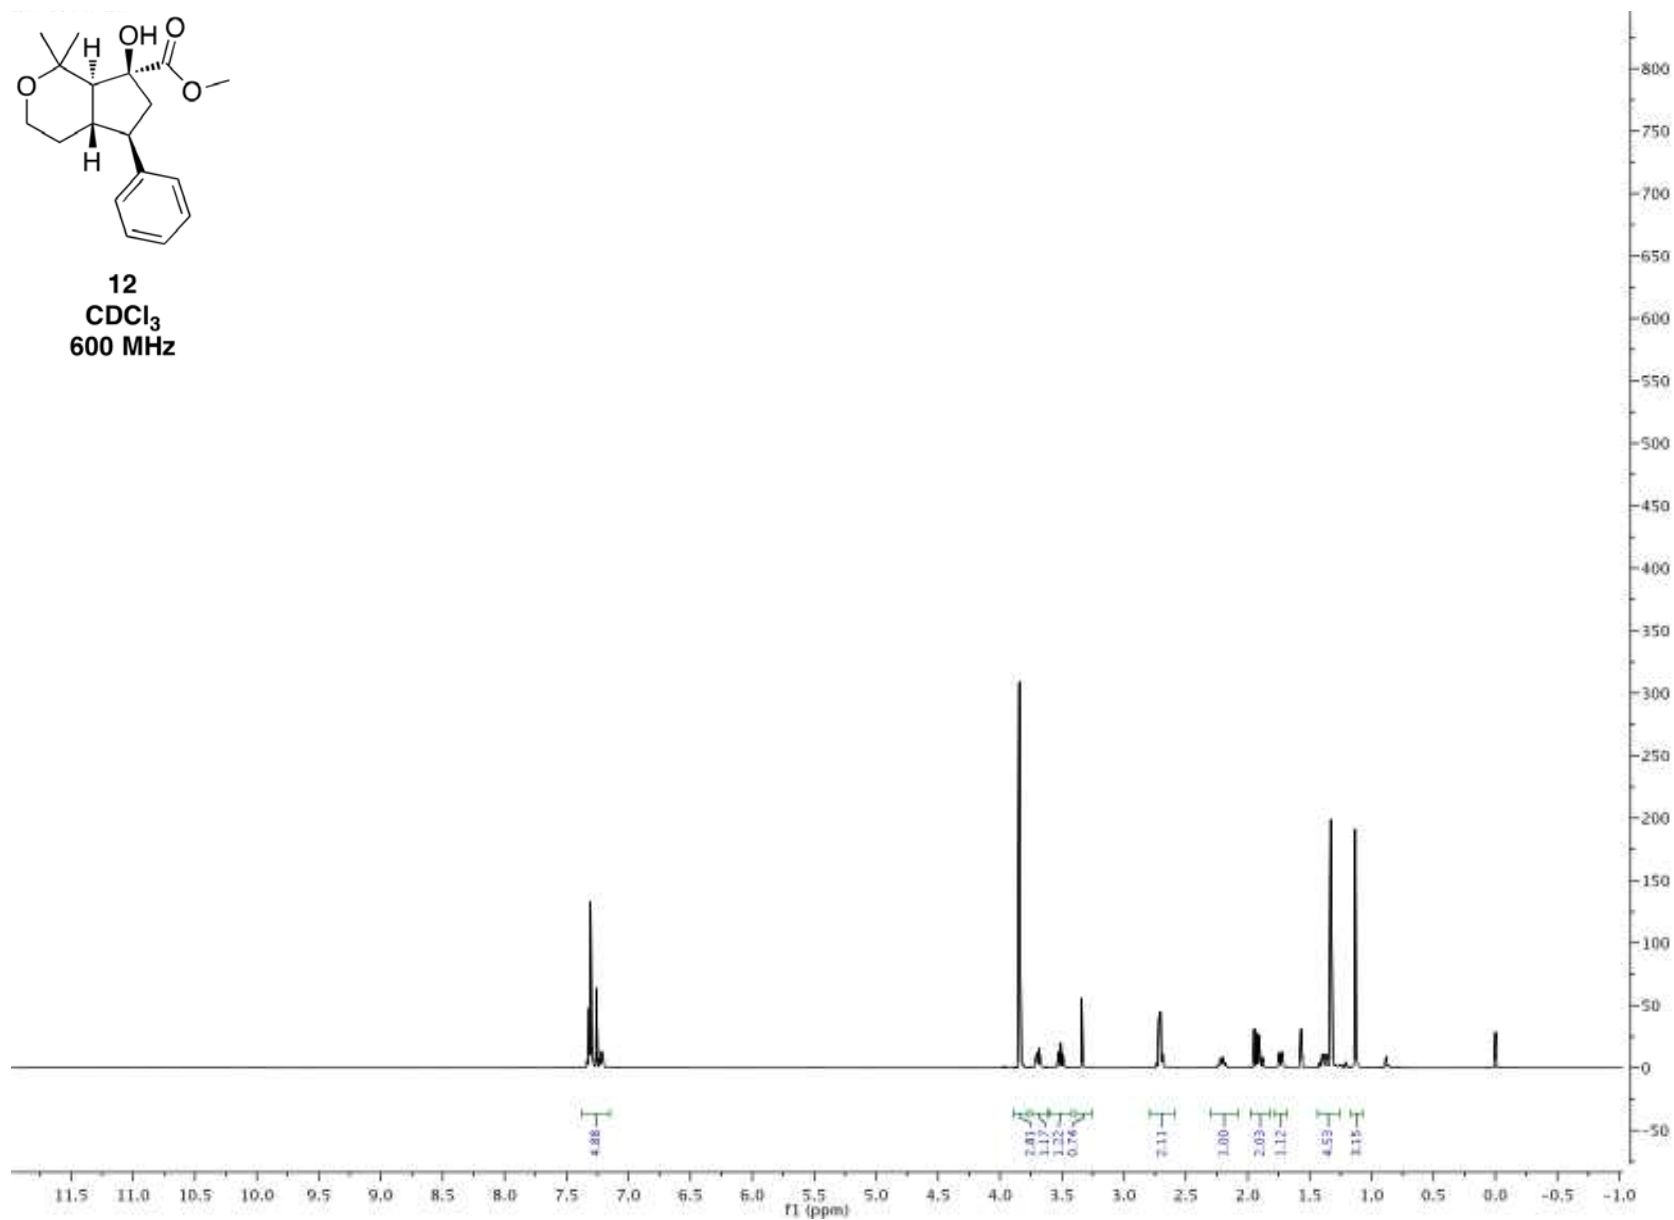

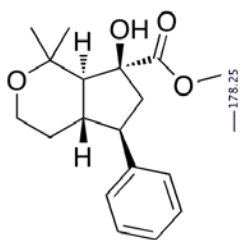

12  
CDCl<sub>3</sub>  
150 MHz

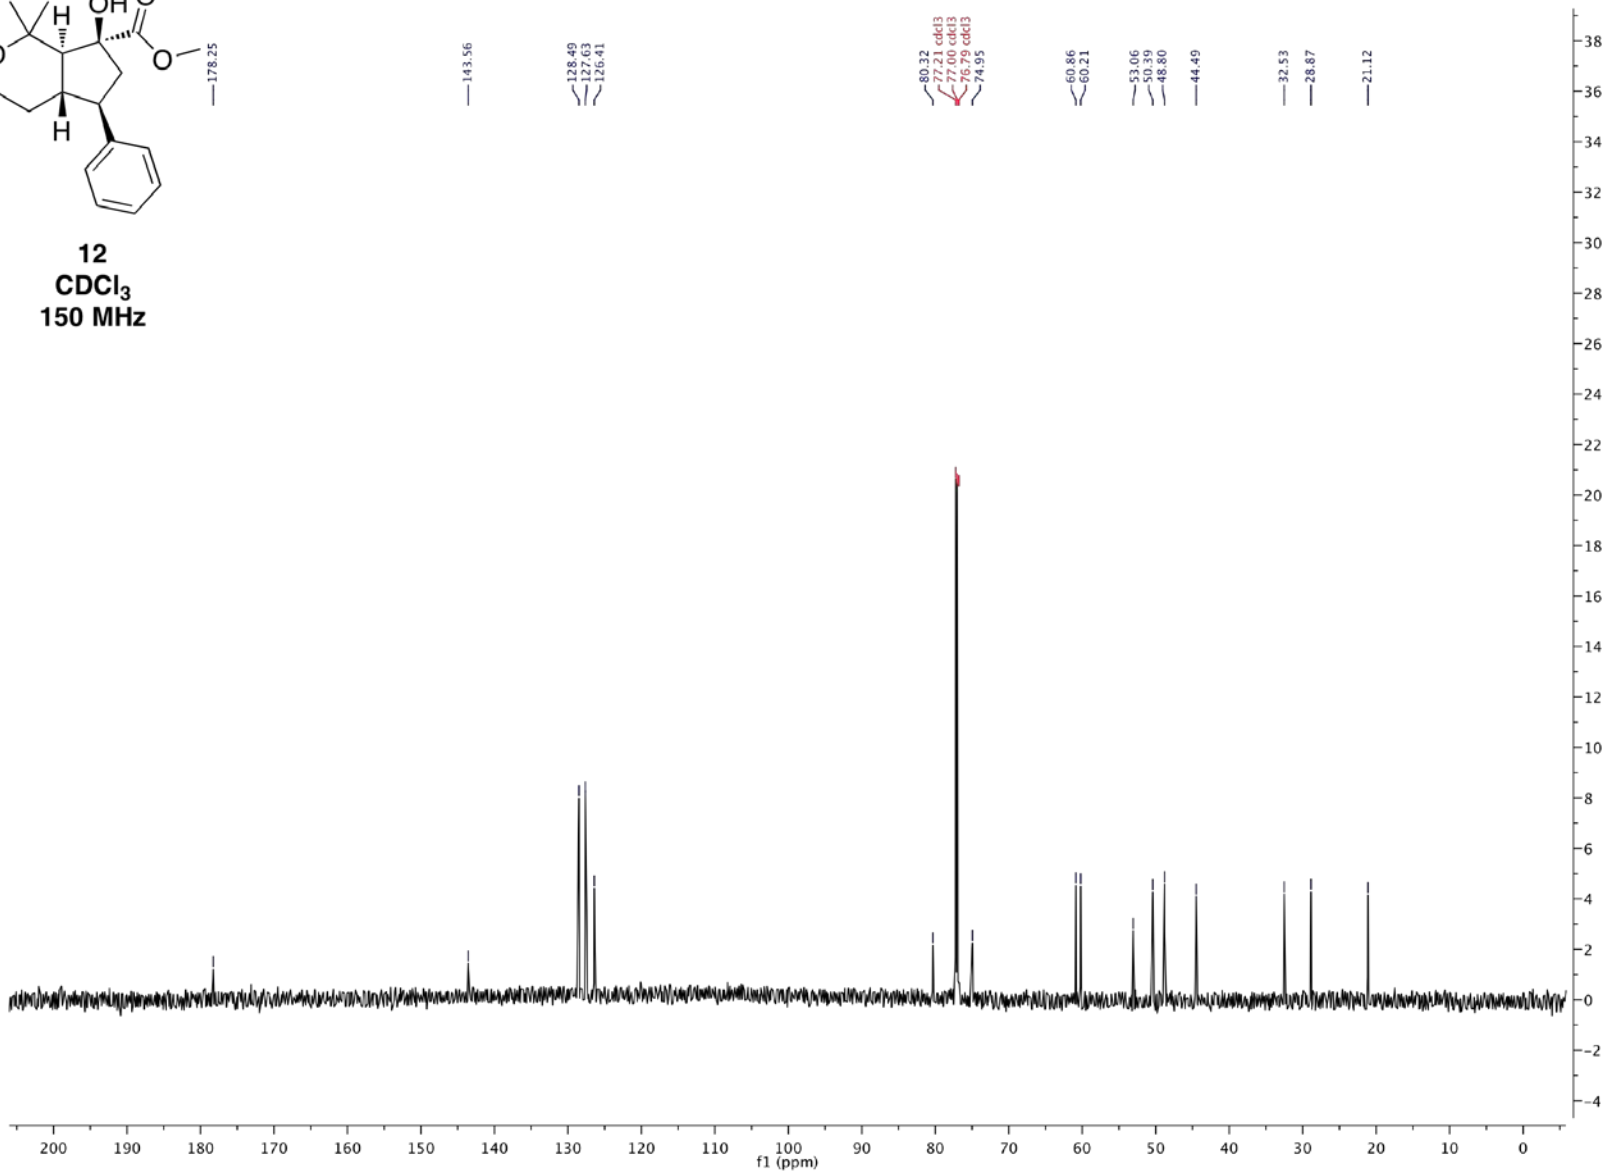

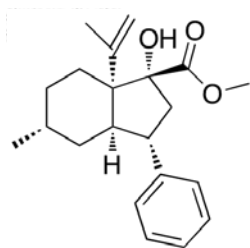

**14**  
**CDCl<sub>3</sub>**  
**600 MHz**

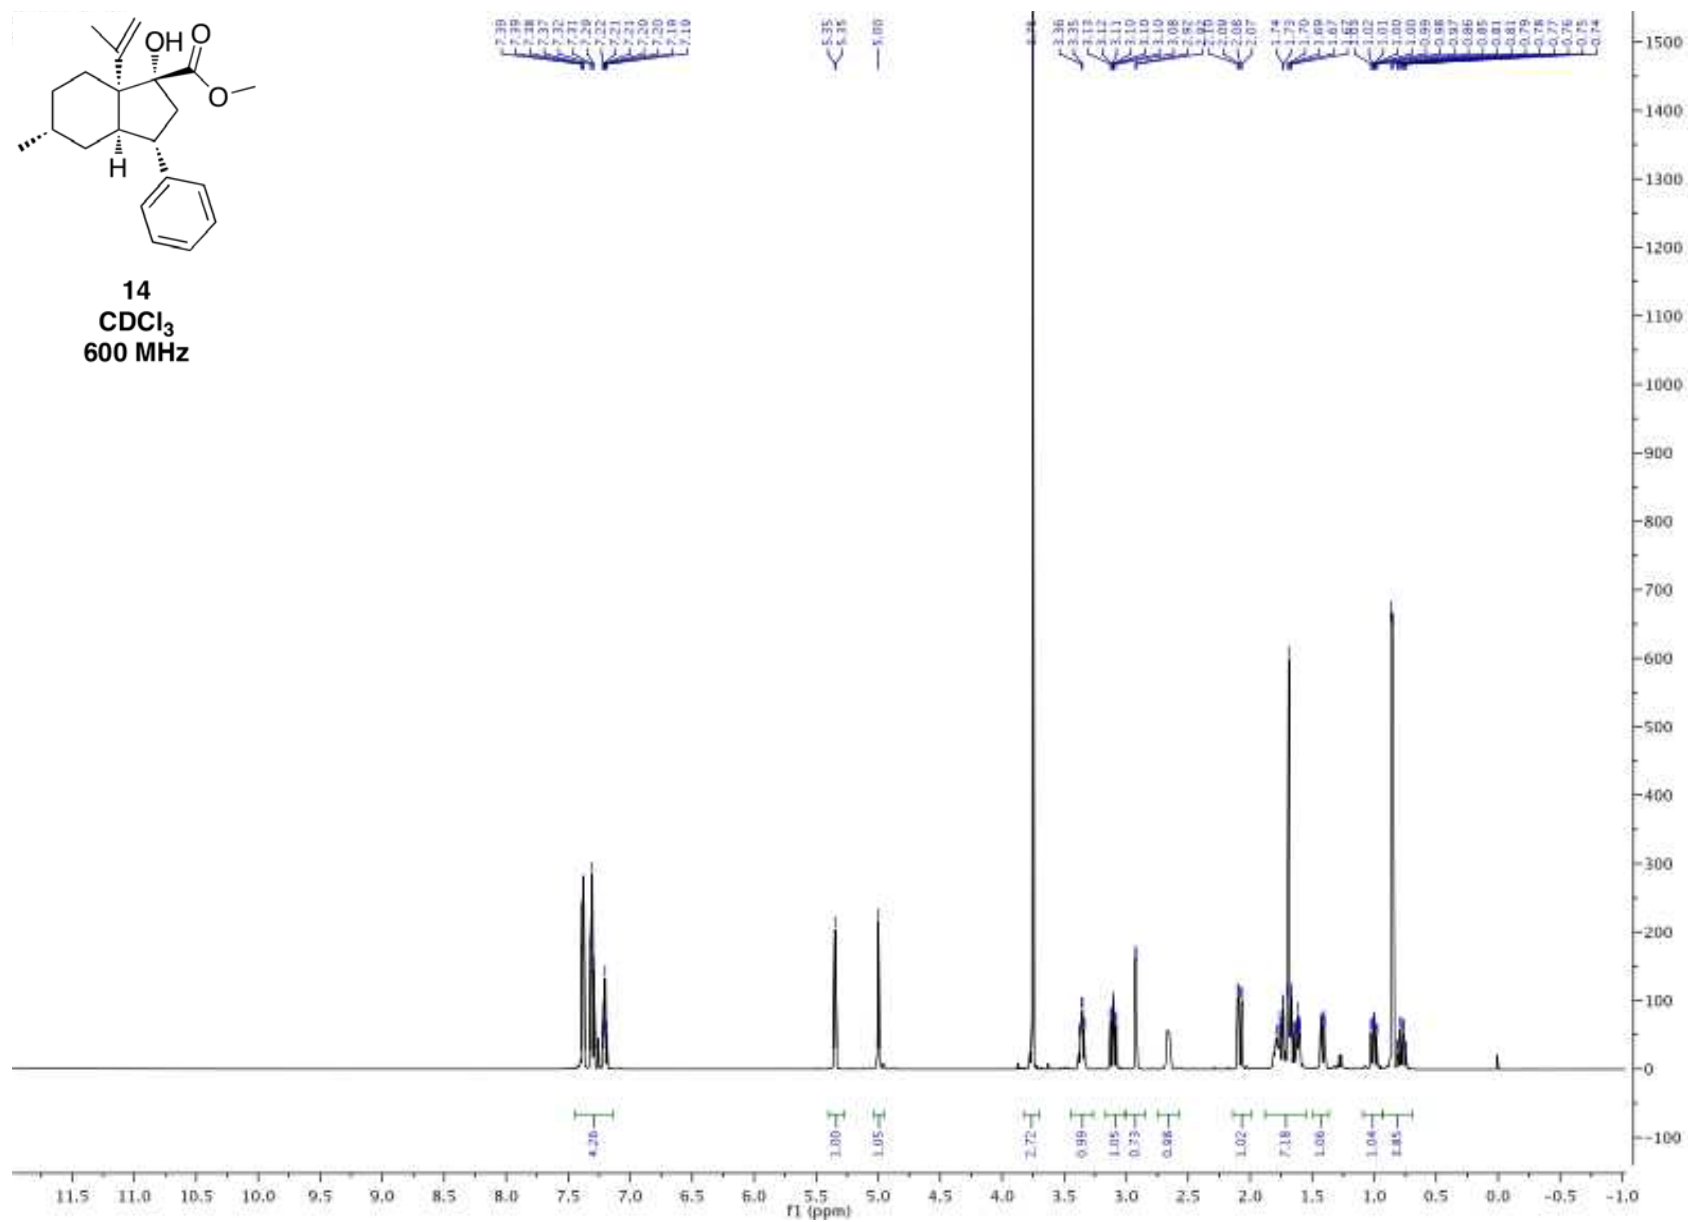

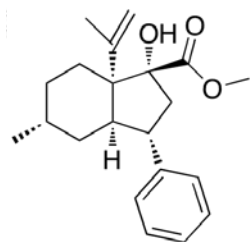

14  
CDCl<sub>3</sub>  
100 MHz

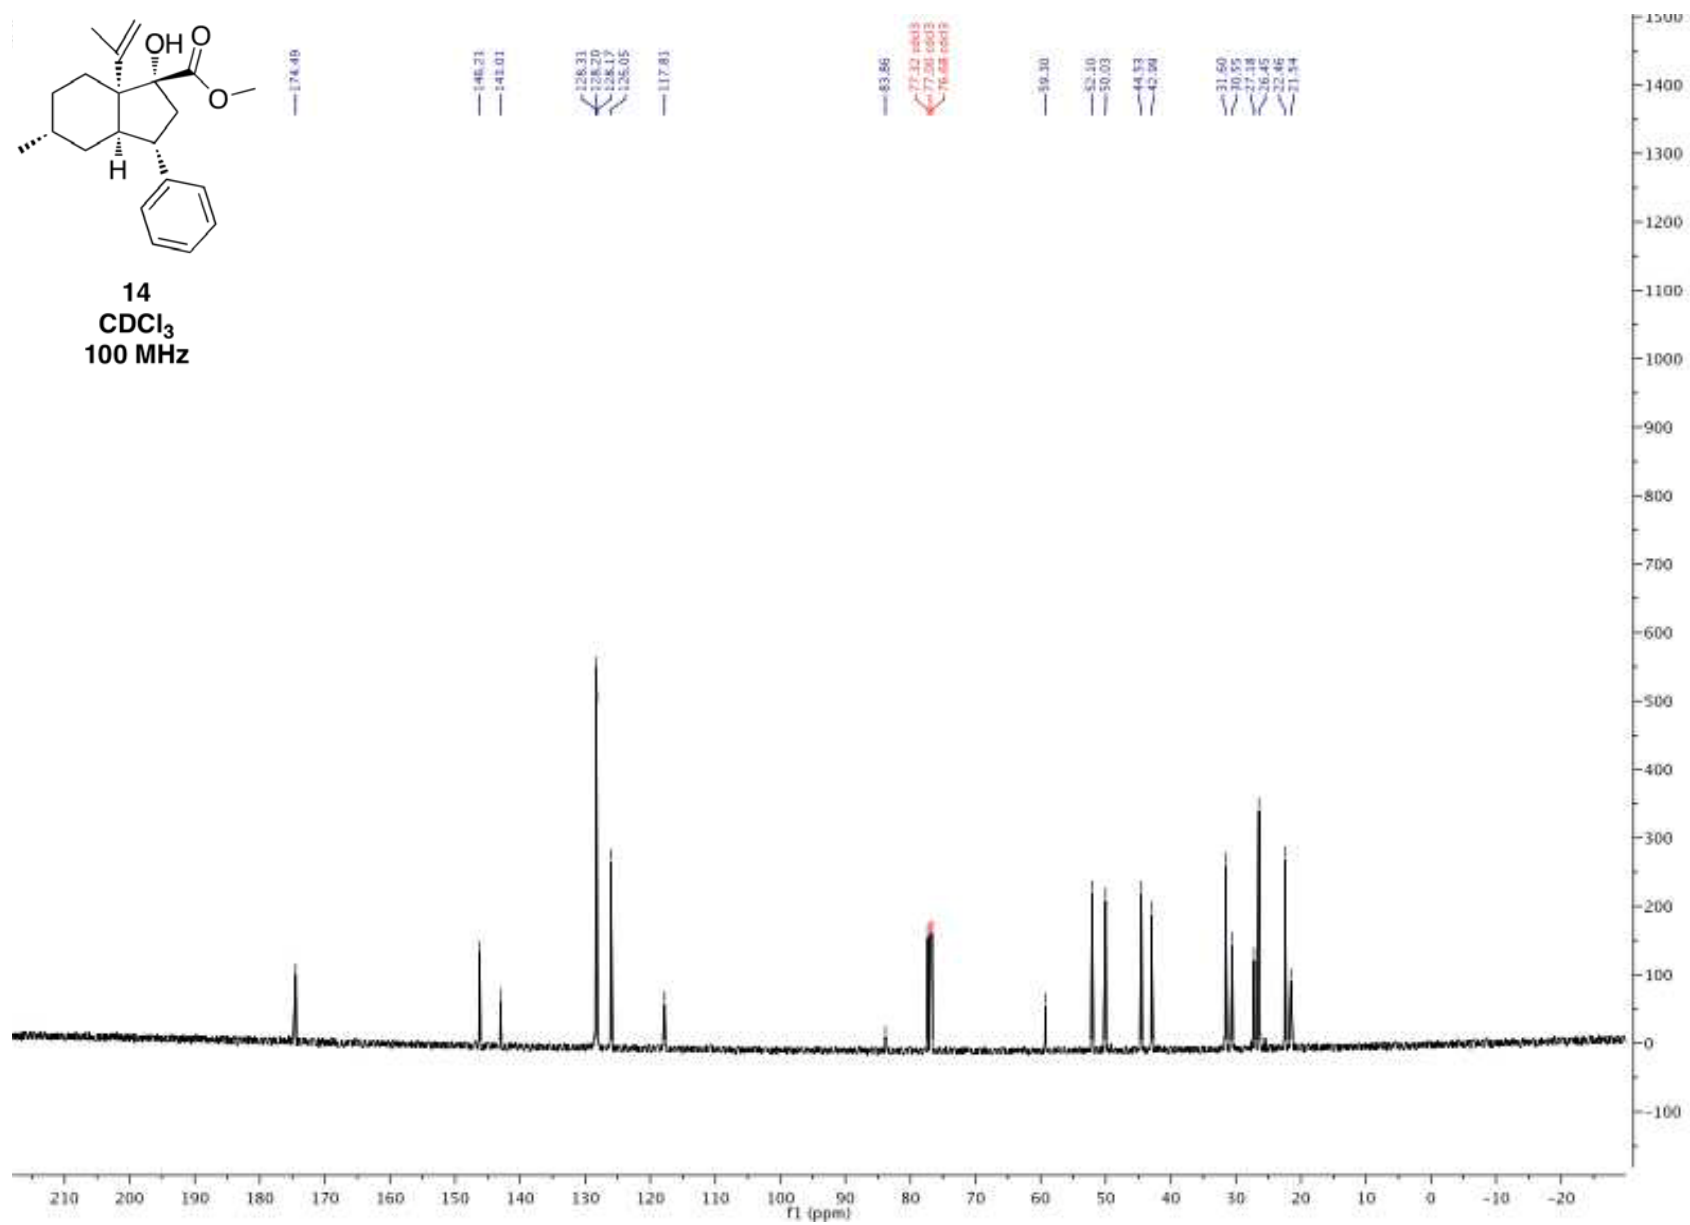

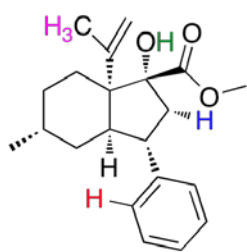

14  
CDCl<sub>3</sub>  
600 MHz

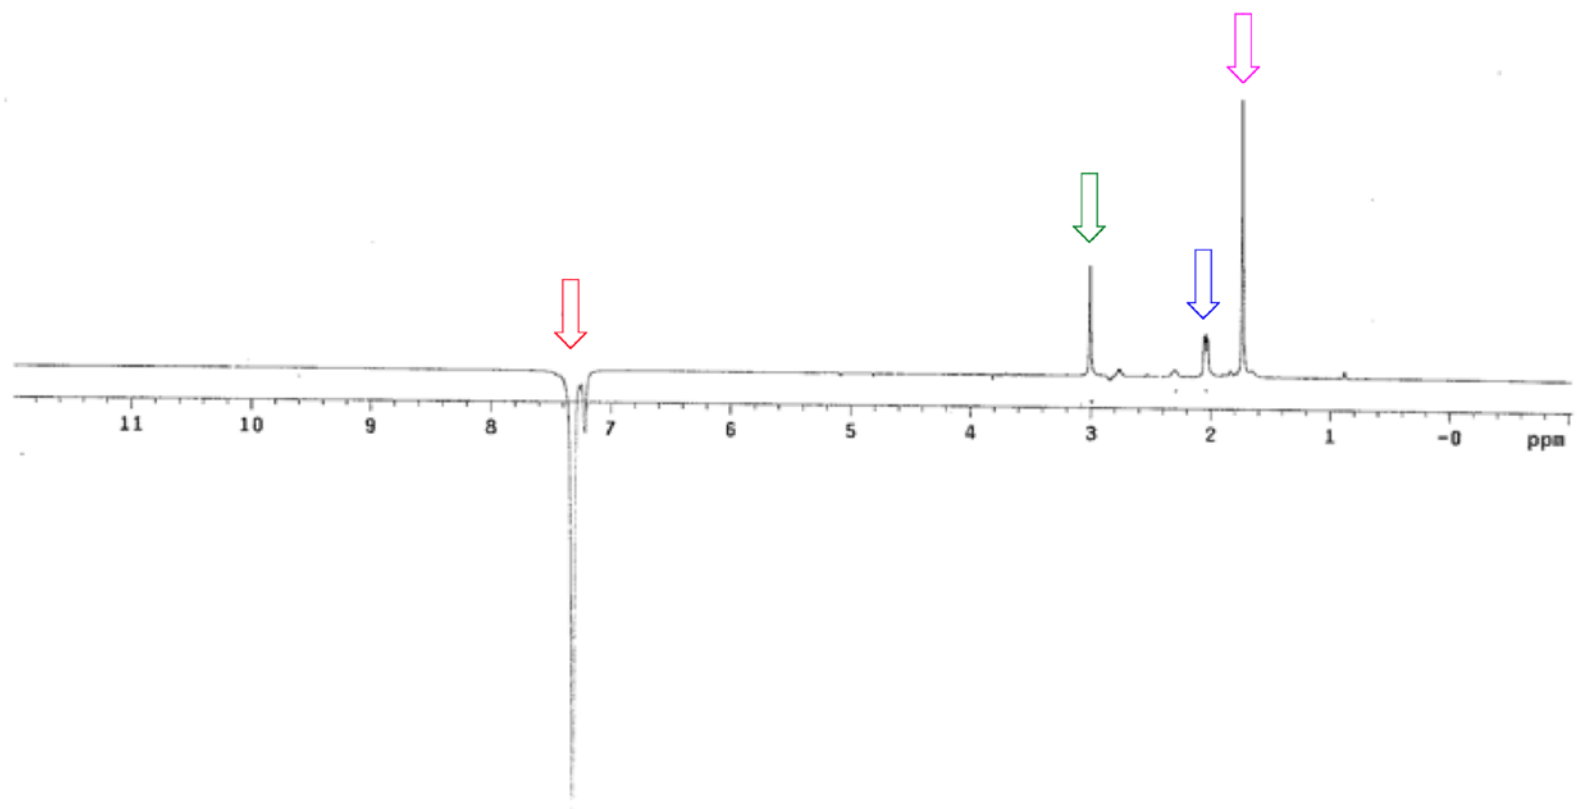



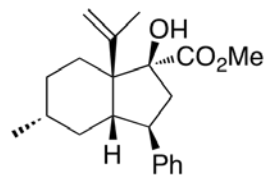

**15**  
**CDCl<sub>3</sub>**  
**150 MHz**

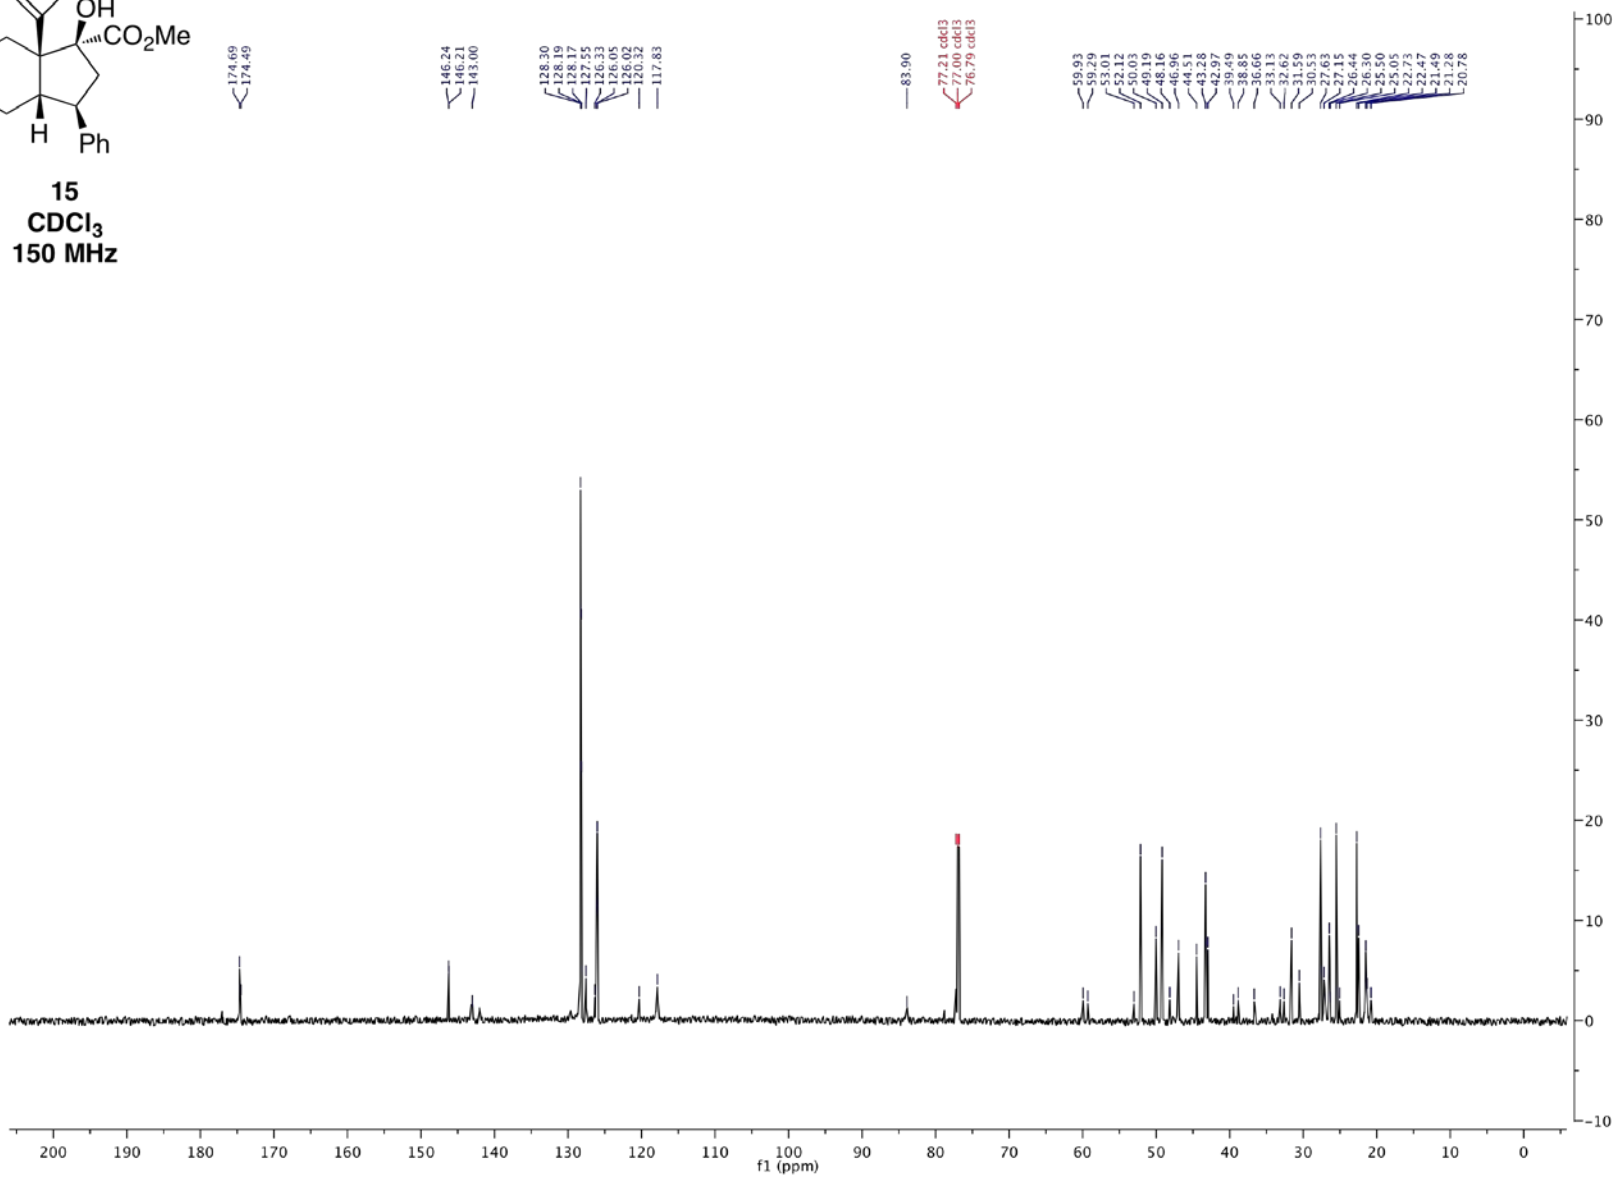

#### **4. X-Ray Crystallography Data**



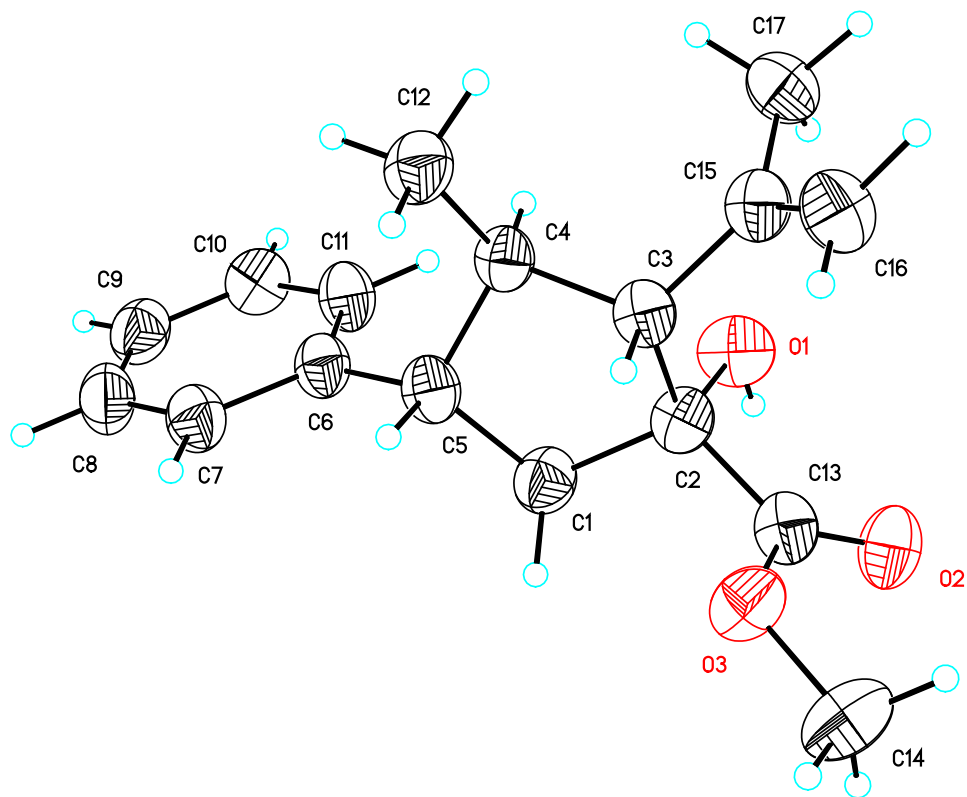

Table 1. Crystal data and structure refinement for **7a**.

|                                 |                                                |          |
|---------------------------------|------------------------------------------------|----------|
| Identification code             | <b>7a</b>                                      |          |
| Empirical formula               | C <sub>17</sub> H <sub>22</sub> O <sub>3</sub> |          |
| Formula weight                  | 274.35                                         |          |
| Temperature                     | 173(2) K                                       |          |
| Wavelength                      | 1.54178 Å                                      |          |
| Crystal system                  | Orthorhombic                                   |          |
| Space group                     | Pbca                                           |          |
| Unit cell dimensions            | a = 12.7496(10) Å                              | ∠ = 90°. |
|                                 | b = 10.6190(12) Å                              | ∠ = 90°. |
|                                 | c = 22.4445(18) Å                              | ∠ = 90°. |
| Volume                          | 3038.7(5) Å <sup>3</sup>                       |          |
| Z                               | 8                                              |          |
| Density (calculated)            | 1.199 Mg/m <sup>3</sup>                        |          |
| Absorption coefficient          | 0.646 mm <sup>-1</sup>                         |          |
| F(000)                          | 1184                                           |          |
| Crystal size                    | 0.14 x 0.13 x 0.04 mm <sup>3</sup>             |          |
| Theta range for data collection | 3.94 to 69.41°.                                |          |
| Index ranges                    | -15 ≤ h ≤ 15, -12 ≤ k ≤ 12, -27 ≤ l ≤ 24       |          |
| Reflections collected           | 15922                                          |          |
| Independent reflections         | 2779 [R(int) = 0.0829]                         |          |
| Completeness to theta = 69.41°  | 97.4 %                                         |          |
| Absorption correction           | Semi-empirical from equivalents                |          |

|                                   |                                             |
|-----------------------------------|---------------------------------------------|
| Max. and min. transmission        | 0.9721 and 0.9150                           |
| Refinement method                 | Full-matrix least-squares on F <sup>2</sup> |
| Data / restraints / parameters    | 2779 / 0 / 190                              |
| Goodness-of-fit on F <sup>2</sup> | 1.066                                       |
| Final R indices [I>2sigma(I)]     | R1 = 0.0761, wR2 = 0.1951                   |
| R indices (all data)              | R1 = 0.1217, wR2 = 0.2347                   |
| Extinction coefficient            | 0.0009(3)                                   |
| Largest diff. peak and hole       | 0.285 and -0.395 e.Å <sup>-3</sup>          |

Table 2. Atomic coordinates ( $\times 10^4$ ) and equivalent isotropic displacement parameters ( $\text{\AA}^2 \times 10^3$ )

for **7a**.  $U(\text{eq})$  is defined as one third of the trace of the orthogonalized  $U^{ij}$  tensor.

|       | x       | y       | z       | $U(\text{eq})$ |
|-------|---------|---------|---------|----------------|
| C(1)  | 2628(3) | 2173(3) | 2767(2) | 56(1)          |
| C(2)  | 2095(3) | 2524(3) | 3365(1) | 49(1)          |
| C(3)  | 1169(3) | 1559(3) | 3416(1) | 47(1)          |
| C(4)  | 817(3)  | 1418(3) | 2767(1) | 47(1)          |
| C(5)  | 1856(3) | 1294(3) | 2427(2) | 49(1)          |
| C(6)  | 1793(3) | 1553(3) | 1765(2) | 49(1)          |
| C(7)  | 2183(3) | 697(3)  | 1352(2) | 57(1)          |
| C(8)  | 2146(3) | 947(4)  | 746(2)  | 65(1)          |
| C(9)  | 1725(3) | 2047(4) | 537(2)  | 65(1)          |
| C(10) | 1326(3) | 2910(3) | 941(2)  | 62(1)          |
| C(11) | 1361(3) | 2662(3) | 1546(2) | 56(1)          |
| C(12) | 71(3)   | 308(3)  | 2666(2) | 58(1)          |
| C(13) | 2834(3) | 2453(3) | 3891(2) | 52(1)          |
| C(14) | 3921(4) | 1142(4) | 4473(2) | 78(1)          |
| C(15) | 343(3)  | 1831(3) | 3874(1) | 51(1)          |
| C(16) | 295(4)  | 1167(4) | 4375(2) | 62(1)          |
| C(17) | -467(3) | 2845(3) | 3748(2) | 62(1)          |
| O(1)  | 1691(2) | 3769(2) | 3330(1) | 64(1)          |

|      |         |         |         |       |
|------|---------|---------|---------|-------|
| O(2) | 3057(2) | 3350(2) | 4192(1) | 67(1) |
| O(3) | 3207(2) | 1298(2) | 3980(1) | 62(1) |

---

Table 3. Bond lengths [ $\text{\AA}$ ] and angles [ $^\circ$ ] for **7a**.

---

|            |          |
|------------|----------|
| C(1)-C(2)  | 1.550(5) |
| C(1)-C(5)  | 1.556(5) |
| C(1)-H(1A) | 0.9900   |
| C(1)-H(1B) | 0.9900   |
| C(2)-O(1)  | 1.421(4) |
| C(2)-C(13) | 1.513(5) |
| C(2)-C(3)  | 1.568(4) |
| C(3)-C(15) | 1.499(5) |
| C(3)-C(4)  | 1.533(4) |
| C(3)-H(3A) | 1.0000   |
| C(4)-C(12) | 1.531(4) |
| C(4)-C(5)  | 1.534(5) |
| C(4)-H(4A) | 1.0000   |
| C(5)-C(6)  | 1.513(5) |
| C(5)-H(5A) | 1.0000   |
| C(6)-C(11) | 1.390(5) |
| C(6)-C(7)  | 1.392(5) |
| C(7)-C(8)  | 1.386(5) |
| C(7)-H(7A) | 0.9500   |
| C(8)-C(9)  | 1.368(6) |
| C(8)-H(8A) | 0.9500   |

|              |          |
|--------------|----------|
| C(9)-C(10)   | 1.386(5) |
| C(9)-H(9A)   | 0.9500   |
| C(10)-C(11)  | 1.384(5) |
| C(10)-H(10A) | 0.9500   |
| C(11)-H(11A) | 0.9500   |
| C(12)-H(12A) | 0.9800   |
| C(12)-H(12B) | 0.9800   |
| C(12)-H(12C) | 0.9800   |
| C(13)-O(2)   | 1.201(4) |
| C(13)-O(3)   | 1.330(4) |
| C(14)-O(3)   | 1.442(5) |
| C(14)-H(14A) | 0.9800   |
| C(14)-H(14B) | 0.9800   |
| C(14)-H(14C) | 0.9800   |
| C(15)-C(16)  | 1.328(5) |
| C(15)-C(17)  | 1.519(5) |
| C(16)-H(16A) | 0.99(4)  |
| C(16)-H(16B) | 0.93(4)  |
| C(17)-H(17A) | 0.9800   |
| C(17)-H(17B) | 0.9800   |
| C(17)-H(17C) | 0.9800   |
| O(1)-H(1C)   | 0.8400   |

|                  |          |
|------------------|----------|
| C(2)-C(1)-C(5)   | 106.9(3) |
| C(2)-C(1)-H(1A)  | 110.3    |
| C(5)-C(1)-H(1A)  | 110.3    |
| C(2)-C(1)-H(1B)  | 110.3    |
| C(5)-C(1)-H(1B)  | 110.3    |
| H(1A)-C(1)-H(1B) | 108.6    |
| O(1)-C(2)-C(13)  | 108.4(3) |
| O(1)-C(2)-C(1)   | 109.5(3) |
| C(13)-C(2)-C(1)  | 113.0(3) |
| O(1)-C(2)-C(3)   | 109.9(3) |
| C(13)-C(2)-C(3)  | 112.3(3) |
| C(1)-C(2)-C(3)   | 103.6(2) |
| C(15)-C(3)-C(4)  | 117.7(3) |
| C(15)-C(3)-C(2)  | 116.9(3) |
| C(4)-C(3)-C(2)   | 102.4(2) |
| C(15)-C(3)-H(3A) | 106.3    |
| C(4)-C(3)-H(3A)  | 106.3    |
| C(2)-C(3)-H(3A)  | 106.3    |
| C(12)-C(4)-C(3)  | 113.4(3) |
| C(12)-C(4)-C(5)  | 113.4(3) |
| C(3)-C(4)-C(5)   | 103.2(3) |
| C(12)-C(4)-H(4A) | 108.9    |
| C(3)-C(4)-H(4A)  | 108.9    |



|                    |          |
|--------------------|----------|
| C(5)-C(4)-H(4A)    | 108.9    |
| C(6)-C(5)-C(4)     | 115.2(3) |
| C(6)-C(5)-C(1)     | 114.0(3) |
| C(4)-C(5)-C(1)     | 104.6(3) |
| C(6)-C(5)-H(5A)    | 107.6    |
| C(4)-C(5)-H(5A)    | 107.6    |
| C(1)-C(5)-H(5A)    | 107.6    |
| C(11)-C(6)-C(7)    | 117.3(3) |
| C(11)-C(6)-C(5)    | 121.5(3) |
| C(7)-C(6)-C(5)     | 121.2(3) |
| C(8)-C(7)-C(6)     | 121.1(3) |
| C(8)-C(7)-H(7A)    | 119.4    |
| C(6)-C(7)-H(7A)    | 119.4    |
| C(9)-C(8)-C(7)     | 120.9(3) |
| C(9)-C(8)-H(8A)    | 119.6    |
| C(7)-C(8)-H(8A)    | 119.6    |
| C(8)-C(9)-C(10)    | 119.0(4) |
| C(8)-C(9)-H(9A)    | 120.5    |
| C(10)-C(9)-H(9A)   | 120.5    |
| C(11)-C(10)-C(9)   | 120.2(4) |
| C(11)-C(10)-H(10A) | 119.9    |
| C(9)-C(10)-H(10A)  | 119.9    |
| C(10)-C(11)-C(6)   | 121.5(3) |

|                     |          |
|---------------------|----------|
| C(10)-C(11)-H(11A)  | 119.3    |
| C(6)-C(11)-H(11A)   | 119.3    |
| C(4)-C(12)-H(12A)   | 109.5    |
| C(4)-C(12)-H(12B)   | 109.5    |
| H(12A)-C(12)-H(12B) | 109.5    |
| C(4)-C(12)-H(12C)   | 109.5    |
| H(12A)-C(12)-H(12C) | 109.5    |
| H(12B)-C(12)-H(12C) | 109.5    |
| O(2)-C(13)-O(3)     | 124.2(3) |
| O(2)-C(13)-C(2)     | 123.1(3) |
| O(3)-C(13)-C(2)     | 112.7(3) |
| O(3)-C(14)-H(14A)   | 109.5    |
| O(3)-C(14)-H(14B)   | 109.5    |
| H(14A)-C(14)-H(14B) | 109.5    |
| O(3)-C(14)-H(14C)   | 109.5    |
| H(14A)-C(14)-H(14C) | 109.5    |
| H(14B)-C(14)-H(14C) | 109.5    |
| C(16)-C(15)-C(3)    | 120.7(3) |
| C(16)-C(15)-C(17)   | 120.2(4) |
| C(3)-C(15)-C(17)    | 119.1(3) |
| C(15)-C(16)-H(16A)  | 123(2)   |
| C(15)-C(16)-H(16B)  | 123(2)   |
| H(16A)-C(16)-H(16B) | 114(3)   |

|                     |          |
|---------------------|----------|
| C(15)-C(17)-H(17A)  | 109.5    |
| C(15)-C(17)-H(17B)  | 109.5    |
| H(17A)-C(17)-H(17B) | 109.5    |
| C(15)-C(17)-H(17C)  | 109.5    |
| H(17A)-C(17)-H(17C) | 109.5    |
| H(17B)-C(17)-H(17C) | 109.5    |
| C(2)-O(1)-H(1C)     | 109.5    |
| C(13)-O(3)-C(14)    | 116.5(3) |

---

Table 4. Anisotropic displacement parameters ( $\text{\AA}^2 \times 10^3$ ) for **7a**. The anisotropic displacement factor exponent takes the form:  $-2h^2 [ h^2 a^{*2} U^{11} + \dots + 2 h k a^* b^* U^{12} ]$

|       | U <sup>11</sup> | U <sup>22</sup> | U <sup>33</sup> | U <sup>23</sup> | U <sup>13</sup> | U <sup>12</sup> |
|-------|-----------------|-----------------|-----------------|-----------------|-----------------|-----------------|
| C(1)  | 58(2)           | 60(2)           | 50(2)           | 0(2)            | 0(2)            | -7(2)           |
| C(2)  | 56(2)           | 37(2)           | 54(2)           | 2(1)            | -1(2)           | -7(1)           |
| C(3)  | 54(2)           | 37(1)           | 49(2)           | 1(1)            | 2(2)            | -2(1)           |
| C(4)  | 55(2)           | 37(2)           | 48(2)           | 0(1)            | -1(2)           | 0(1)            |
| C(5)  | 60(2)           | 36(2)           | 52(2)           | -2(1)           | 2(2)            | 1(1)            |
| C(6)  | 57(2)           | 37(2)           | 52(2)           | -5(1)           | 2(2)            | -4(1)           |
| C(7)  | 64(3)           | 48(2)           | 60(2)           | -7(2)           | 0(2)            | 1(2)            |
| C(8)  | 72(3)           | 67(2)           | 56(2)           | -17(2)          | 4(2)            | -5(2)           |
| C(9)  | 64(3)           | 80(3)           | 51(2)           | -6(2)           | 2(2)            | -14(2)          |
| C(10) | 69(3)           | 56(2)           | 61(2)           | 7(2)            | -3(2)           | -3(2)           |
| C(11) | 73(3)           | 42(2)           | 54(2)           | -3(1)           | 4(2)            | 0(2)            |
| C(12) | 62(3)           | 44(2)           | 67(2)           | -6(2)           | -3(2)           | -5(2)           |
| C(13) | 63(2)           | 41(2)           | 53(2)           | 0(1)            | 6(2)            | -9(2)           |
| C(14) | 76(3)           | 80(3)           | 78(3)           | 18(2)           | -27(2)          | -11(2)          |
| C(15) | 60(2)           | 39(2)           | 54(2)           | -1(1)           | 1(2)            | -4(1)           |
| C(16) | 72(3)           | 56(2)           | 57(2)           | 6(2)            | 10(2)           | 1(2)            |
| C(17) | 62(3)           | 55(2)           | 68(2)           | 2(2)            | 10(2)           | 5(2)            |
| O(1)  | 70(2)           | 35(1)           | 88(2)           | 8(1)            | -1(1)           | -4(1)           |

|      |       |       |       |       |        |        |
|------|-------|-------|-------|-------|--------|--------|
| O(2) | 87(2) | 54(1) | 59(2) | -9(1) | -5(1)  | -13(1) |
| O(3) | 69(2) | 49(1) | 68(2) | 2(1)  | -17(1) | -1(1)  |

---

Table 5. Hydrogen coordinates ( $\times 10^4$ ) and isotropic displacement parameters ( $\text{\AA}^2 \times 10^3$ ) for **7a**.

|        | x    | y    | z    | U(eq) |
|--------|------|------|------|-------|
| H(1A)  | 3300 | 1735 | 2842 | 67    |
| H(1B)  | 2771 | 2941 | 2531 | 67    |
| H(3A)  | 1492 | 735  | 3531 | 56    |
| H(4A)  | 460  | 2212 | 2639 | 56    |
| H(5A)  | 2110 | 410  | 2479 | 59    |
| H(7A)  | 2480 | -73  | 1487 | 69    |
| H(8A)  | 2418 | 348  | 472  | 78    |
| H(9A)  | 1705 | 2215 | 122  | 78    |
| H(10A) | 1029 | 3676 | 802  | 74    |
| H(11A) | 1083 | 3262 | 1817 | 68    |
| H(12A) | -130 | 275  | 2244 | 87    |
| H(12B) | -558 | 418  | 2911 | 87    |
| H(12C) | 423  | -478 | 2776 | 87    |
| H(14A) | 4144 | 260  | 4495 | 117   |
| H(14B) | 3569 | 1379 | 4844 | 117   |
| H(14C) | 4536 | 1682 | 4413 | 117   |
| H(17A) | -954 | 2905 | 4084 | 92    |

|        |          |          |          |        |
|--------|----------|----------|----------|--------|
| H(17B) | -858     | 2628     | 3386     | 92     |
| H(17C) | -113     | 3655     | 3691     | 92     |
| H(16A) | -260(30) | 1290(30) | 4678(16) | 60(11) |
| H(16B) | 740(30)  | 500(40)  | 4454(16) | 67(11) |
| H(1C)  | 2190     | 4282     | 3302     | 96     |

---

Table 6. Torsion angles [°] for **7a**.

---

|                       |           |
|-----------------------|-----------|
| C(5)-C(1)-C(2)-O(1)   | -103.1(3) |
| C(5)-C(1)-C(2)-C(13)  | 135.9(3)  |
| C(5)-C(1)-C(2)-C(3)   | 14.1(3)   |
| O(1)-C(2)-C(3)-C(15)  | -49.1(4)  |
| C(13)-C(2)-C(3)-C(15) | 71.7(4)   |
| C(1)-C(2)-C(3)-C(15)  | -166.1(3) |
| O(1)-C(2)-C(3)-C(4)   | 81.1(3)   |
| C(13)-C(2)-C(3)-C(4)  | -158.1(3) |
| C(1)-C(2)-C(3)-C(4)   | -35.8(3)  |
| C(15)-C(3)-C(4)-C(12) | -62.8(4)  |
| C(2)-C(3)-C(4)-C(12)  | 167.5(3)  |
| C(15)-C(3)-C(4)-C(5)  | 174.1(2)  |
| C(2)-C(3)-C(4)-C(5)   | 44.4(3)   |
| C(12)-C(4)-C(5)-C(6)  | 75.5(3)   |
| C(3)-C(4)-C(5)-C(6)   | -161.4(2) |
| C(12)-C(4)-C(5)-C(1)  | -158.6(3) |
| C(3)-C(4)-C(5)-C(1)   | -35.5(3)  |
| C(2)-C(1)-C(5)-C(6)   | 139.5(3)  |
| C(2)-C(1)-C(5)-C(4)   | 12.9(3)   |
| C(4)-C(5)-C(6)-C(11)  | 53.2(4)   |
| C(1)-C(5)-C(6)-C(11)  | -67.6(5)  |



|                       |           |
|-----------------------|-----------|
| C(4)-C(5)-C(6)-C(7)   | -127.9(3) |
| C(1)-C(5)-C(6)-C(7)   | 111.2(4)  |
| C(11)-C(6)-C(7)-C(8)  | 0.4(6)    |
| C(5)-C(6)-C(7)-C(8)   | -178.5(4) |
| C(6)-C(7)-C(8)-C(9)   | 0.0(6)    |
| C(7)-C(8)-C(9)-C(10)  | -0.3(6)   |
| C(8)-C(9)-C(10)-C(11) | 0.2(6)    |
| C(9)-C(10)-C(11)-C(6) | 0.2(6)    |
| C(7)-C(6)-C(11)-C(10) | -0.5(6)   |
| C(5)-C(6)-C(11)-C(10) | 178.4(3)  |
| O(1)-C(2)-C(13)-O(2)  | -3.9(5)   |
| C(1)-C(2)-C(13)-O(2)  | 117.7(4)  |
| C(3)-C(2)-C(13)-O(2)  | -125.5(4) |
| O(1)-C(2)-C(13)-O(3)  | 176.5(3)  |
| C(1)-C(2)-C(13)-O(3)  | -61.9(4)  |
| C(3)-C(2)-C(13)-O(3)  | 54.9(4)   |
| C(4)-C(3)-C(15)-C(16) | 131.3(4)  |
| C(2)-C(3)-C(15)-C(16) | -106.0(4) |
| C(4)-C(3)-C(15)-C(17) | -46.4(4)  |
| C(2)-C(3)-C(15)-C(17) | 76.2(4)   |
| O(2)-C(13)-O(3)-C(14) | 0.2(6)    |
| C(2)-C(13)-O(3)-C(14) | 179.9(3)  |

---

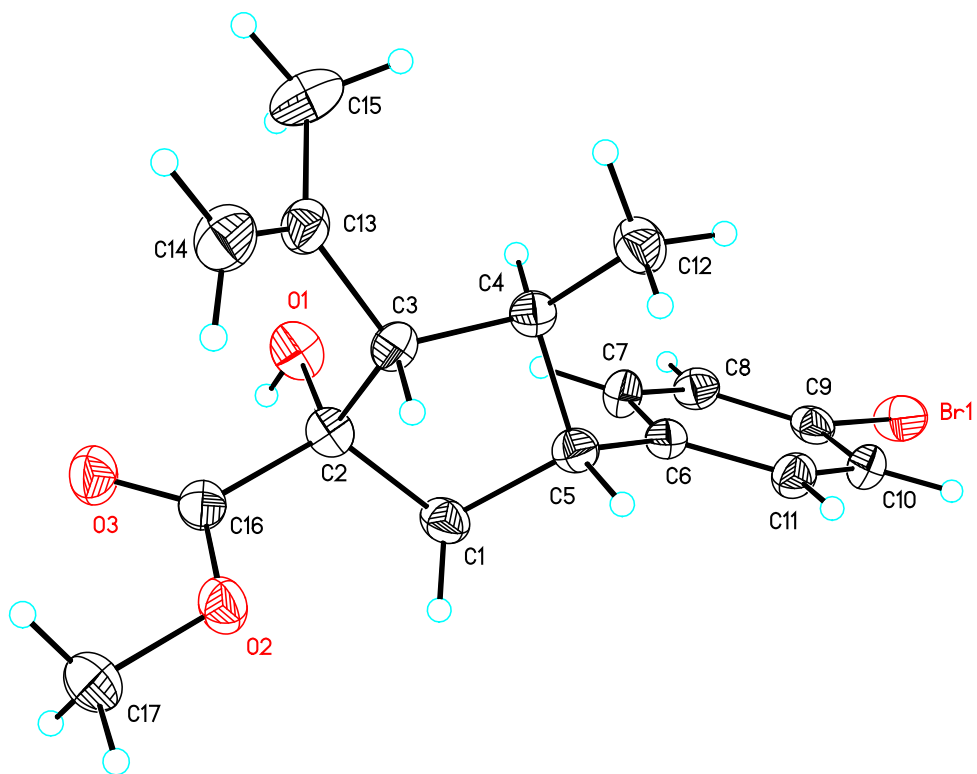

Table 1. Crystal data and structure refinement for **9c**.

|                                 |                                                   |          |
|---------------------------------|---------------------------------------------------|----------|
| Identification code             | <b>9c</b>                                         |          |
| Empirical formula               | C <sub>17</sub> H <sub>21</sub> Br O <sub>3</sub> |          |
| Formula weight                  | 353.25                                            |          |
| Temperature                     | 173(2) K                                          |          |
| Wavelength                      | 1.54178 Å                                         |          |
| Crystal system                  | Orthorhombic                                      |          |
| Space group                     | P2(1)2(1)2(1)                                     |          |
| Unit cell dimensions            | a = 5.8343(3) Å                                   | ∠ = 90°. |
|                                 | b = 7.4644(4) Å                                   | ∠ = 90°. |
|                                 | c = 37.7001(18) Å                                 | ∠ = 90°. |
| Volume                          | 1641.82(14) Å <sup>3</sup>                        |          |
| Z                               | 4                                                 |          |
| Density (calculated)            | 1.429 Mg/m <sup>3</sup>                           |          |
| Absorption coefficient          | 3.473 mm <sup>-1</sup>                            |          |
| F(000)                          | 728                                               |          |
| Crystal size                    | 0.36 x 0.20 x 0.16 mm <sup>3</sup>                |          |
| Theta range for data collection | 2.34 to 69.24°.                                   |          |
| Index ranges                    | -7 ≤ h ≤ 6, -9 ≤ k ≤ 6, -41 ≤ l ≤ 45              |          |
| Reflections collected           | 13100                                             |          |
| Independent reflections         | 2837 [R(int) = 0.0216]                            |          |
| Completeness to theta = 69.24°  | 97.2 %                                            |          |

|                                   |                                             |
|-----------------------------------|---------------------------------------------|
| Absorption correction             | Semi-empirical from equivalents             |
| Max. and min. transmission        | 0.6065 and 0.3678                           |
| Refinement method                 | Full-matrix least-squares on F <sup>2</sup> |
| Data / restraints / parameters    | 2837 / 0 / 190                              |
| Goodness-of-fit on F <sup>2</sup> | 1.028                                       |
| Final R indices [I>2sigma(I)]     | R1 = 0.0243, wR2 = 0.0653                   |
| R indices (all data)              | R1 = 0.0245, wR2 = 0.0654                   |
| Absolute structure parameter      | 0.024(16)                                   |
| Largest diff. peak and hole       | 0.289 and -0.308 e.Å <sup>-3</sup>          |

Table 2. Atomic coordinates ( $\times 10^4$ ) and equivalent isotropic displacement parameters ( $\text{\AA}^2 \times 10^3$ )

for **9c**.  $U(\text{eq})$  is defined as one third of the trace of the orthogonalized  $U^i_j$  tensor.

|       | x       | y        | z       | U(eq) |
|-------|---------|----------|---------|-------|
| Br(1) | 3377(1) | 306(1)   | 8152(1) | 45(1) |
| C(1)  | 1529(5) | -1691(3) | 6375(1) | 33(1) |
| C(2)  | 2954(4) | -1357(3) | 6039(1) | 29(1) |
| C(3)  | 2374(4) | 629(3)   | 5952(1) | 27(1) |
| C(4)  | 2487(4) | 1498(3)  | 6320(1) | 27(1) |
| C(5)  | 1105(4) | 171(3)   | 6548(1) | 28(1) |
| C(6)  | 1677(4) | 245(3)   | 6941(1) | 27(1) |
| C(7)  | 3774(4) | -379(3)  | 7065(1) | 31(1) |
| C(8)  | 4286(4) | -362(3)  | 7425(1) | 32(1) |
| C(9)  | 2681(4) | 308(3)   | 7658(1) | 30(1) |
| C(10) | 618(4)  | 981(3)   | 7544(1) | 33(1) |
| C(11) | 121(4)  | 942(3)   | 7184(1) | 30(1) |
| C(12) | 1588(5) | 3405(3)  | 6332(1) | 37(1) |
| C(13) | 3721(4) | 1465(3)  | 5653(1) | 33(1) |
| C(14) | 2814(5) | 1564(4)  | 5333(1) | 46(1) |
| C(15) | 6048(5) | 2194(5)  | 5735(1) | 54(1) |
| C(16) | 2416(4) | -2559(3) | 5726(1) | 30(1) |
| C(17) | -405(5) | -3703(4) | 5343(1) | 47(1) |

|      |         |          |         |       |
|------|---------|----------|---------|-------|
| O(1) | 5321(3) | -1541(2) | 6121(1) | 39(1) |
| O(2) | 185(3)  | -2629(2) | 5651(1) | 36(1) |
| O(3) | 3871(3) | -3302(2) | 5556(1) | 42(1) |

---

Table 3. Bond lengths [ $\text{\AA}$ ] and angles [ $^\circ$ ] for **9c**.

---

|            |          |
|------------|----------|
| Br(1)-C(9) | 1.907(2) |
| C(1)-C(2)  | 1.538(3) |
| C(1)-C(5)  | 1.554(3) |
| C(1)-H(1A) | 0.9900   |
| C(1)-H(1B) | 0.9900   |
| C(2)-O(1)  | 1.422(3) |
| C(2)-C(16) | 1.515(3) |
| C(2)-C(3)  | 1.556(3) |
| C(3)-C(13) | 1.507(3) |
| C(3)-C(4)  | 1.533(3) |
| C(3)-H(3A) | 1.0000   |
| C(4)-C(12) | 1.517(3) |
| C(4)-C(5)  | 1.541(3) |
| C(4)-H(4A) | 1.0000   |
| C(5)-C(6)  | 1.517(3) |
| C(5)-H(5A) | 1.0000   |
| C(6)-C(7)  | 1.390(3) |
| C(6)-C(11) | 1.392(3) |
| C(7)-C(8)  | 1.391(3) |
| C(7)-H(7A) | 0.9500   |
| C(8)-C(9)  | 1.377(3) |

|              |          |
|--------------|----------|
| C(8)-H(8A)   | 0.9500   |
| C(9)-C(10)   | 1.374(3) |
| C(10)-C(11)  | 1.388(3) |
| C(10)-H(10A) | 0.9500   |
| C(11)-H(11A) | 0.9500   |
| C(12)-H(12A) | 0.9800   |
| C(12)-H(12B) | 0.9800   |
| C(12)-H(12C) | 0.9800   |
| C(13)-C(14)  | 1.322(4) |
| C(13)-C(15)  | 1.495(4) |
| C(14)-H(14A) | 0.9962   |
| C(14)-H(14B) | 0.9202   |
| C(15)-H(15A) | 0.9800   |
| C(15)-H(15B) | 0.9800   |
| C(15)-H(15C) | 0.9800   |
| C(16)-O(3)   | 1.199(3) |
| C(16)-O(2)   | 1.333(3) |
| C(17)-O(2)   | 1.451(3) |
| C(17)-H(17A) | 0.9800   |
| C(17)-H(17B) | 0.9800   |
| C(17)-H(17C) | 0.9800   |
| O(1)-H(1C)   | 0.8400   |



|                  |            |
|------------------|------------|
| C(2)-C(1)-C(5)   | 106.72(17) |
| C(2)-C(1)-H(1A)  | 110.4      |
| C(5)-C(1)-H(1A)  | 110.4      |
| C(2)-C(1)-H(1B)  | 110.4      |
| C(5)-C(1)-H(1B)  | 110.4      |
| H(1A)-C(1)-H(1B) | 108.6      |
| O(1)-C(2)-C(16)  | 108.28(19) |
| O(1)-C(2)-C(1)   | 109.24(19) |
| C(16)-C(2)-C(1)  | 115.8(2)   |
| O(1)-C(2)-C(3)   | 110.42(18) |
| C(16)-C(2)-C(3)  | 110.84(18) |
| C(1)-C(2)-C(3)   | 102.15(18) |
| C(13)-C(3)-C(4)  | 118.54(19) |
| C(13)-C(3)-C(2)  | 116.00(19) |
| C(4)-C(3)-C(2)   | 101.74(17) |
| C(13)-C(3)-H(3A) | 106.6      |
| C(4)-C(3)-H(3A)  | 106.6      |
| C(2)-C(3)-H(3A)  | 106.6      |
| C(12)-C(4)-C(3)  | 114.16(19) |
| C(12)-C(4)-C(5)  | 113.9(2)   |
| C(3)-C(4)-C(5)   | 102.22(17) |
| C(12)-C(4)-H(4A) | 108.8      |
| C(3)-C(4)-H(4A)  | 108.8      |

|                    |            |
|--------------------|------------|
| C(5)-C(4)-H(4A)    | 108.8      |
| C(6)-C(5)-C(4)     | 113.97(18) |
| C(6)-C(5)-C(1)     | 113.99(18) |
| C(4)-C(5)-C(1)     | 104.89(17) |
| C(6)-C(5)-H(5A)    | 107.9      |
| C(4)-C(5)-H(5A)    | 107.9      |
| C(1)-C(5)-H(5A)    | 107.9      |
| C(7)-C(6)-C(11)    | 118.4(2)   |
| C(7)-C(6)-C(5)     | 120.70(19) |
| C(11)-C(6)-C(5)    | 120.9(2)   |
| C(6)-C(7)-C(8)     | 121.0(2)   |
| C(6)-C(7)-H(7A)    | 119.5      |
| C(8)-C(7)-H(7A)    | 119.5      |
| C(9)-C(8)-C(7)     | 118.6(2)   |
| C(9)-C(8)-H(8A)    | 120.7      |
| C(7)-C(8)-H(8A)    | 120.7      |
| C(10)-C(9)-C(8)    | 122.0(2)   |
| C(10)-C(9)-Br(1)   | 119.50(18) |
| C(8)-C(9)-Br(1)    | 118.52(18) |
| C(9)-C(10)-C(11)   | 118.8(2)   |
| C(9)-C(10)-H(10A)  | 120.6      |
| C(11)-C(10)-H(10A) | 120.6      |
| C(10)-C(11)-C(6)   | 121.1(2)   |

|                     |          |
|---------------------|----------|
| C(10)-C(11)-H(11A)  | 119.5    |
| C(6)-C(11)-H(11A)   | 119.5    |
| C(4)-C(12)-H(12A)   | 109.5    |
| C(4)-C(12)-H(12B)   | 109.5    |
| H(12A)-C(12)-H(12B) | 109.5    |
| C(4)-C(12)-H(12C)   | 109.5    |
| H(12A)-C(12)-H(12C) | 109.5    |
| H(12B)-C(12)-H(12C) | 109.5    |
| C(14)-C(13)-C(15)   | 122.1(2) |
| C(14)-C(13)-C(3)    | 119.8(2) |
| C(15)-C(13)-C(3)    | 118.1(2) |
| C(13)-C(14)-H(14A)  | 120.8    |
| C(13)-C(14)-H(14B)  | 124.6    |
| H(14A)-C(14)-H(14B) | 114.3    |
| C(13)-C(15)-H(15A)  | 109.5    |
| C(13)-C(15)-H(15B)  | 109.5    |
| H(15A)-C(15)-H(15B) | 109.5    |
| C(13)-C(15)-H(15C)  | 109.5    |
| H(15A)-C(15)-H(15C) | 109.5    |
| H(15B)-C(15)-H(15C) | 109.5    |
| O(3)-C(16)-O(2)     | 124.0(2) |
| O(3)-C(16)-C(2)     | 122.9(2) |
| O(2)-C(16)-C(2)     | 113.0(2) |

|                     |          |
|---------------------|----------|
| O(2)-C(17)-H(17A)   | 109.5    |
| O(2)-C(17)-H(17B)   | 109.5    |
| H(17A)-C(17)-H(17B) | 109.5    |
| O(2)-C(17)-H(17C)   | 109.5    |
| H(17A)-C(17)-H(17C) | 109.5    |
| H(17B)-C(17)-H(17C) | 109.5    |
| C(2)-O(1)-H(1C)     | 109.5    |
| C(16)-O(2)-C(17)    | 115.0(2) |

---

Symmetry transformations used to generate equivalent atoms:

Table 4. Anisotropic displacement parameters ( $\text{\AA}^2 \times 10^3$ ) for **9c**. The anisotropic displacement factor exponent takes the form:  $-2h^2 [ h^2 a^*2U^{11} + \dots + 2 h k a^* b^* U^{12} ]$

|       | U <sup>11</sup> | U <sup>22</sup> | U <sup>33</sup> | U <sup>23</sup> | U <sup>13</sup> | U <sup>12</sup> |
|-------|-----------------|-----------------|-----------------|-----------------|-----------------|-----------------|
| Br(1) | 50(1)           | 58(1)           | 26(1)           | 0(1)            | -3(1)           | -16(1)          |
| C(1)  | 43(1)           | 28(1)           | 28(1)           | 1(1)            | -1(1)           | -7(1)           |
| C(2)  | 30(1)           | 29(1)           | 28(1)           | 1(1)            | -5(1)           | 3(1)            |
| C(3)  | 24(1)           | 30(1)           | 26(1)           | 3(1)            | 0(1)            | 4(1)            |
| C(4)  | 26(1)           | 28(1)           | 28(1)           | 0(1)            | -1(1)           | 0(1)            |
| C(5)  | 28(1)           | 30(1)           | 27(1)           | 1(1)            | -1(1)           | -2(1)           |
| C(6)  | 29(1)           | 25(1)           | 27(1)           | -1(1)           | 3(1)            | -3(1)           |
| C(7)  | 30(1)           | 35(1)           | 30(1)           | -3(1)           | 4(1)            | 4(1)            |
| C(8)  | 29(1)           | 35(1)           | 32(1)           | 2(1)            | -2(1)           | -2(1)           |
| C(9)  | 40(1)           | 27(1)           | 22(1)           | -1(1)           | -1(1)           | -9(1)           |
| C(10) | 33(1)           | 34(1)           | 32(1)           | -4(1)           | 10(1)           | -1(1)           |
| C(11) | 27(1)           | 30(1)           | 34(1)           | 1(1)            | 3(1)            | 2(1)            |
| C(12) | 46(1)           | 29(1)           | 37(1)           | -1(1)           | 1(1)            | 3(1)            |
| C(13) | 39(1)           | 28(1)           | 32(1)           | 3(1)            | 7(1)            | 5(1)            |
| C(14) | 61(2)           | 47(2)           | 30(1)           | 8(1)            | 3(1)            | -1(1)           |
| C(15) | 36(2)           | 65(2)           | 60(2)           | 15(2)           | 8(1)            | -8(1)           |
| C(16) | 35(1)           | 26(1)           | 29(1)           | 3(1)            | 2(1)            | 2(1)            |
| C(17) | 45(2)           | 56(2)           | 38(1)           | -12(1)          | -6(1)           | -10(1)          |

|      |       |       |       |        |        |       |
|------|-------|-------|-------|--------|--------|-------|
| O(1) | 37(1) | 36(1) | 42(1) | -1(1)  | -11(1) | 10(1) |
| O(2) | 34(1) | 42(1) | 32(1) | -10(1) | -4(1)  | 0(1)  |
| O(3) | 36(1) | 47(1) | 44(1) | -13(1) | 4(1)   | 4(1)  |

---

Table 5. Hydrogen coordinates ( $\times 10^4$ ) and isotropic displacement parameters ( $\text{\AA}^2 \times 10^3$ ) for **9c**.

|        | x     | y     | z    | U(eq) |
|--------|-------|-------|------|-------|
| H(1A)  | 2371  | -2482 | 6541 | 39    |
| H(1B)  | 53    | -2268 | 6314 | 39    |
| H(3A)  | 728   | 655   | 5878 | 32    |
| H(4A)  | 4116  | 1495  | 6402 | 33    |
| H(5A)  | -557  | 466   | 6520 | 34    |
| H(7A)  | 4873  | -824  | 6901 | 38    |
| H(8A)  | 5714  | -803  | 7509 | 38    |
| H(10A) | -450  | 1464  | 7708 | 39    |
| H(11A) | -1304 | 1398  | 7102 | 37    |
| H(12A) | 2542  | 4171  | 6181 | 56    |
| H(12B) | 1638  | 3846  | 6577 | 56    |
| H(12C) | 3     | 3429  | 6246 | 56    |
| H(14A) | 1357  | 930   | 5276 | 69    |
| H(14B) | 3517  | 2084  | 5140 | 69    |
| H(15A) | 6726  | 2692  | 5518 | 81    |
| H(15B) | 7026  | 1230  | 5825 | 81    |
| H(15C) | 5918  | 3139  | 5914 | 81    |

|        |       |       |      |    |
|--------|-------|-------|------|----|
| H(17A) | -2068 | -3672 | 5307 | 70 |
| H(17B) | 88    | -4943 | 5382 | 70 |
| H(17C) | 367   | -3219 | 5133 | 70 |
| H(1C)  | 5610  | -2618 | 6167 | 58 |

---



Table 6. Torsion angles [°] for **9c**.

---

|                       |             |
|-----------------------|-------------|
| C(5)-C(1)-C(2)-O(1)   | 93.5(2)     |
| C(5)-C(1)-C(2)-C(16)  | -144.02(19) |
| C(5)-C(1)-C(2)-C(3)   | -23.5(2)    |
| O(1)-C(2)-C(3)-C(13)  | 57.2(3)     |
| C(16)-C(2)-C(3)-C(13) | -62.8(2)    |
| C(1)-C(2)-C(3)-C(13)  | 173.3(2)    |
| O(1)-C(2)-C(3)-C(4)   | -73.0(2)    |
| C(16)-C(2)-C(3)-C(4)  | 167.05(19)  |
| C(1)-C(2)-C(3)-C(4)   | 43.1(2)     |
| C(13)-C(3)-C(4)-C(12) | 61.6(3)     |
| C(2)-C(3)-C(4)-C(12)  | -169.9(2)   |
| C(13)-C(3)-C(4)-C(5)  | -174.91(19) |
| C(2)-C(3)-C(4)-C(5)   | -46.4(2)    |
| C(12)-C(4)-C(5)-C(6)  | -79.5(2)    |
| C(3)-C(4)-C(5)-C(6)   | 156.86(18)  |
| C(12)-C(4)-C(5)-C(1)  | 155.2(2)    |
| C(3)-C(4)-C(5)-C(1)   | 31.5(2)     |
| C(2)-C(1)-C(5)-C(6)   | -130.0(2)   |
| C(2)-C(1)-C(5)-C(4)   | -4.7(2)     |
| C(4)-C(5)-C(6)-C(7)   | -70.4(3)    |
| C(1)-C(5)-C(6)-C(7)   | 50.0(3)     |

|                        |             |
|------------------------|-------------|
| C(4)-C(5)-C(6)-C(11)   | 109.5(2)    |
| C(1)-C(5)-C(6)-C(11)   | -130.2(2)   |
| C(11)-C(6)-C(7)-C(8)   | 2.0(3)      |
| C(5)-C(6)-C(7)-C(8)    | -178.2(2)   |
| C(6)-C(7)-C(8)-C(9)    | -0.8(4)     |
| C(7)-C(8)-C(9)-C(10)   | -1.0(4)     |
| C(7)-C(8)-C(9)-Br(1)   | 179.35(18)  |
| C(8)-C(9)-C(10)-C(11)  | 1.6(4)      |
| Br(1)-C(9)-C(10)-C(11) | -178.81(19) |
| C(9)-C(10)-C(11)-C(6)  | -0.3(3)     |
| C(7)-C(6)-C(11)-C(10)  | -1.4(3)     |
| C(5)-C(6)-C(11)-C(10)  | 178.7(2)    |
| C(4)-C(3)-C(13)-C(14)  | -140.0(2)   |
| C(2)-C(3)-C(13)-C(14)  | 98.4(3)     |
| C(4)-C(3)-C(13)-C(15)  | 38.8(3)     |
| C(2)-C(3)-C(13)-C(15)  | -82.7(3)    |
| O(1)-C(2)-C(16)-O(3)   | -9.6(3)     |
| C(1)-C(2)-C(16)-O(3)   | -132.7(3)   |
| C(3)-C(2)-C(16)-O(3)   | 111.6(3)    |
| O(1)-C(2)-C(16)-O(2)   | 173.4(2)    |
| C(1)-C(2)-C(16)-O(2)   | 50.4(3)     |
| C(3)-C(2)-C(16)-O(2)   | -65.4(3)    |
| O(3)-C(16)-O(2)-C(17)  | 0.5(4)      |

C(2)-C(16)-O(2)-C(17)

177.4(2)

---

Symmetry transformations used to generate equivalent atoms:

Table 7. Hydrogen bonds for **9c** [ $\text{\AA}$  and  $^\circ$ ].

| D-H...A              | d(D-H) | d(H...A) | d(D...A)   | $\angle(\text{DHA})$ |
|----------------------|--------|----------|------------|----------------------|
| O(1)-H(1C)...Br(1)#1 | 0.84   | 3.05     | 3.6918(17) | 134.5                |

Symmetry transformations used to generate equivalent atoms:

#1  $-x+1, y-1/2, -z+3/2$

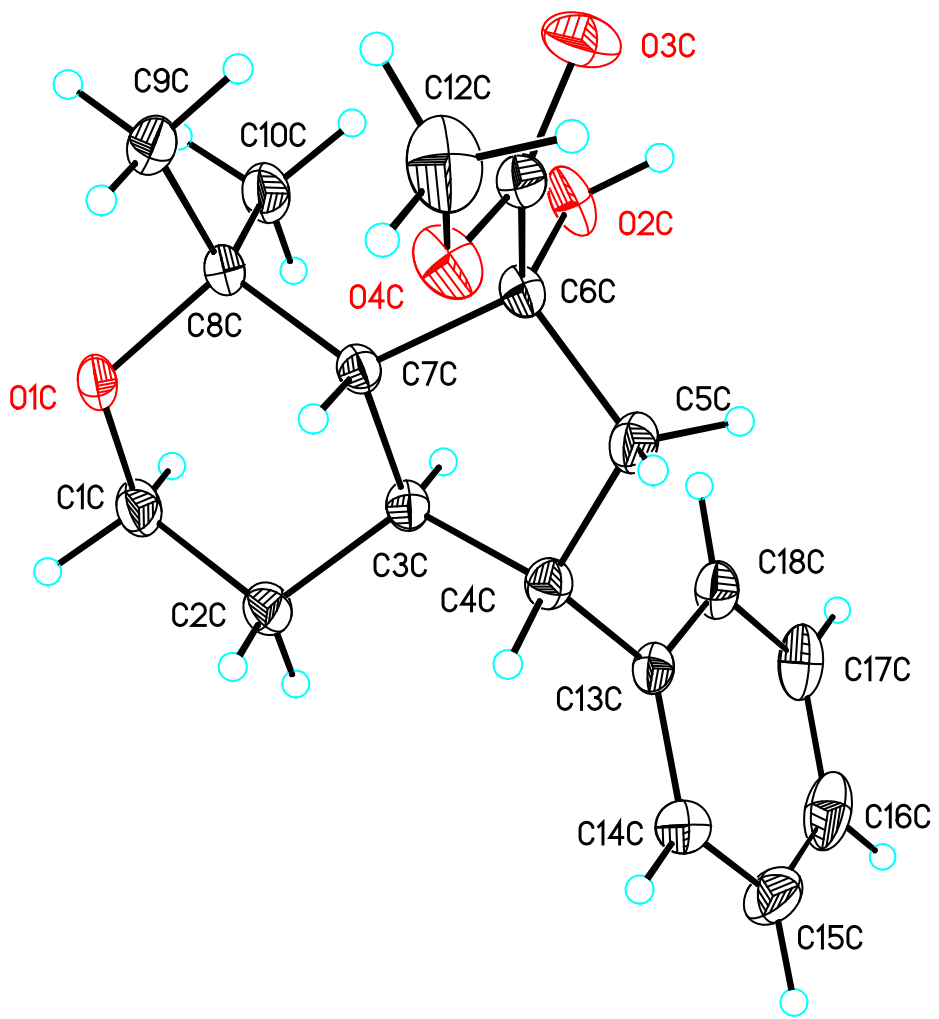

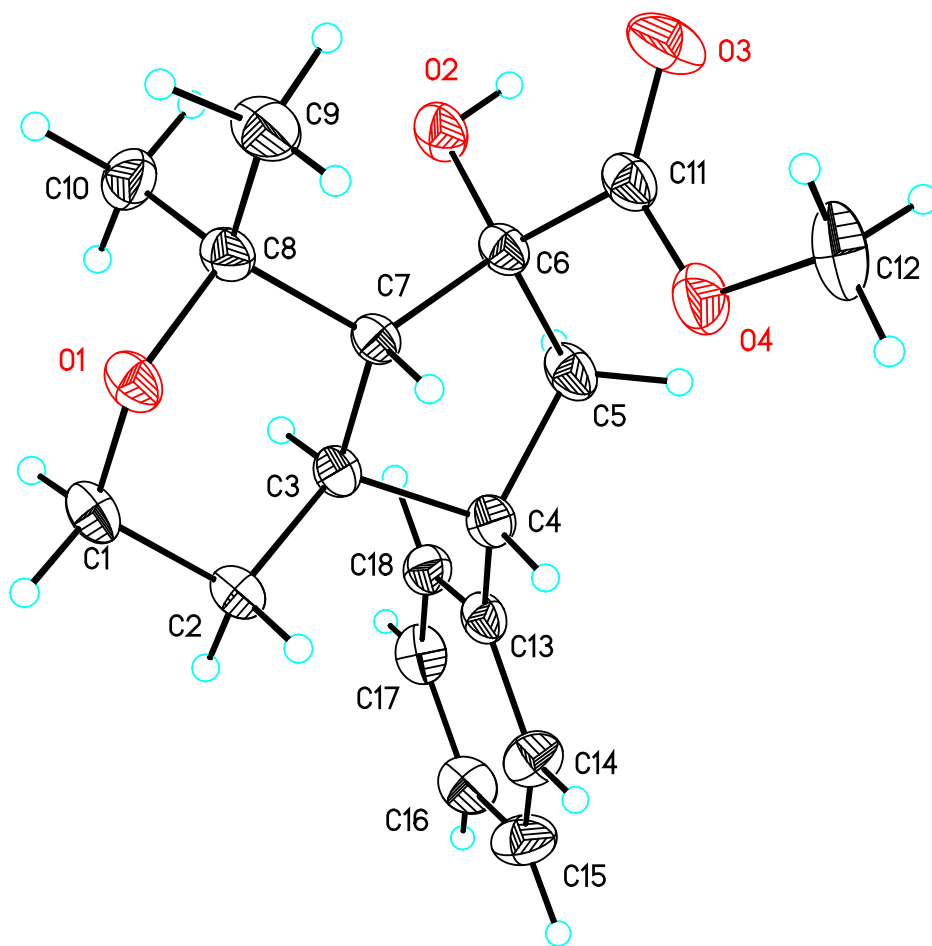

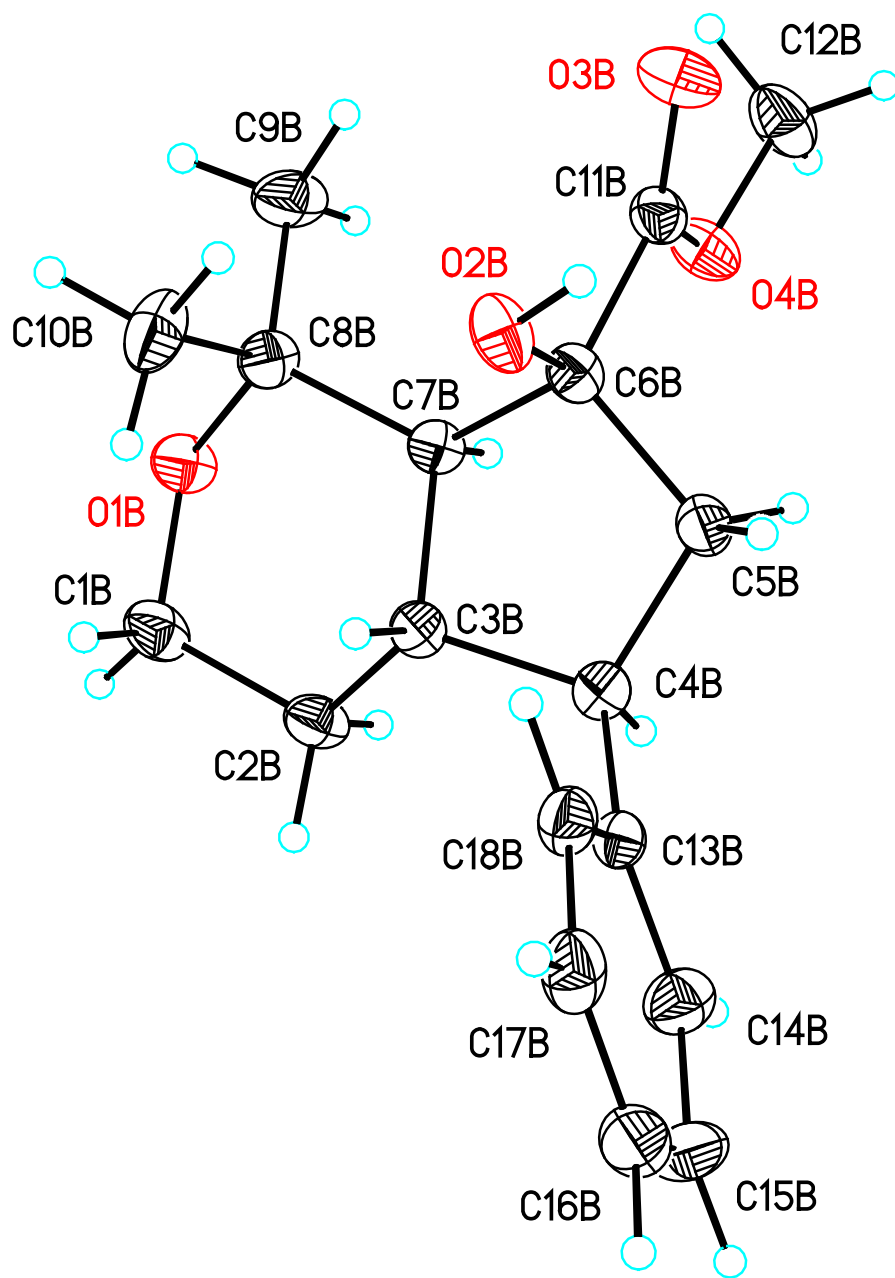

Table 1. Crystal data and structure refinement for **12**.

|                                 |                                                |                    |
|---------------------------------|------------------------------------------------|--------------------|
| Identification code             | <b>12</b>                                      |                    |
| Empirical formula               | C <sub>18</sub> H <sub>24</sub> O <sub>4</sub> |                    |
| Formula weight                  | 304.37                                         |                    |
| Temperature                     | 173(2) K                                       |                    |
| Wavelength                      | 1.54178 Å                                      |                    |
| Crystal system                  | Monoclinic                                     |                    |
| Space group                     | P2(1)/n                                        |                    |
| Unit cell dimensions            | a = 12.1533(3) Å                               | ∠ = 90°.           |
|                                 | b = 35.1495(7) Å                               | ∠ = 110.6840(10)°. |
|                                 | c = 12.2922(3) Å                               | ∠ = 90°.           |
| Volume                          | 4912.5(2) Å <sup>3</sup>                       |                    |
| Z                               | 12                                             |                    |
| Density (calculated)            | 1.235 Mg/m <sup>3</sup>                        |                    |
| Absorption coefficient          | 0.696 mm <sup>-1</sup>                         |                    |
| F(000)                          | 1968                                           |                    |
| Crystal size                    | 0.40 x 0.25 x 0.13 mm <sup>3</sup>             |                    |
| Theta range for data collection | 2.51 to 67.32°.                                |                    |
| Index ranges                    | -14 ≤ h ≤ 14, -37 ≤ k ≤ 41, -14 ≤ l ≤ 13       |                    |
| Reflections collected           | 41157                                          |                    |
| Independent reflections         | 8401 [R(int) = 0.1191]                         |                    |
| Completeness to theta = 67.32°  | 95.1 %                                         |                    |



|                                   |                                             |
|-----------------------------------|---------------------------------------------|
| Absorption correction             | Semi-empirical from equivalents             |
| Max. and min. transmission        | 0.9149 and 0.7681                           |
| Refinement method                 | Full-matrix least-squares on F <sup>2</sup> |
| Data / restraints / parameters    | 8401 / 0 / 596                              |
| Goodness-of-fit on F <sup>2</sup> | 1.132                                       |
| Final R indices [I>2sigma(I)]     | R1 = 0.0801, wR2 = 0.2275                   |
| R indices (all data)              | R1 = 0.0976, wR2 = 0.2637                   |
| Extinction coefficient            | 0.00078(18)                                 |
| Largest diff. peak and hole       | 0.395 and -0.592 e.Å <sup>-3</sup>          |

Table 2. Atomic coordinates ( $\times 10^4$ ) and equivalent isotropic displacement parameters ( $\text{\AA}^2 \times 10^3$ )

for **12**.  $U(\text{eq})$  is defined as one third of the trace of the orthogonalized  $U^{ij}$  tensor.

|       | x       | y        | z       | U(eq) |
|-------|---------|----------|---------|-------|
| C(1)  | 5739(3) | 239(1)   | 1776(3) | 38(1) |
| C(2)  | 5803(2) | 35(1)    | 2887(2) | 35(1) |
| C(3)  | 6875(2) | 170(1)   | 3888(2) | 31(1) |
| C(4)  | 6977(2) | 53(1)    | 5116(2) | 34(1) |
| C(5)  | 7880(3) | 339(1)   | 5880(3) | 41(1) |
| C(6)  | 7800(2) | 706(1)   | 5141(3) | 33(1) |
| C(7)  | 6860(2) | 605(1)   | 3950(2) | 30(1) |
| C(8)  | 6826(2) | 797(1)   | 2816(3) | 36(1) |
| C(9)  | 6588(3) | 1219(1)  | 2822(3) | 49(1) |
| C(10) | 7898(3) | 723(1)   | 2464(3) | 44(1) |
| C(11) | 7414(2) | 1047(1)  | 5692(2) | 36(1) |
| C(12) | 5967(3) | 1267(1)  | 6417(3) | 63(1) |
| C(13) | 7275(2) | -362(1)  | 5398(2) | 35(1) |
| C(14) | 6475(3) | -601(1)  | 5627(3) | 43(1) |
| C(15) | 6714(3) | -984(1)  | 5862(3) | 48(1) |
| C(16) | 7757(3) | -1137(1) | 5859(3) | 46(1) |
| C(17) | 8570(3) | -905(1)  | 5633(3) | 43(1) |
| C(18) | 8323(2) | -519(1)  | 5402(3) | 39(1) |

|        |         |         |          |       |
|--------|---------|---------|----------|-------|
| O(1)   | 5771(2) | 646(1)  | 1916(2)  | 37(1) |
| O(2)   | 8893(2) | 786(1)  | 5022(2)  | 42(1) |
| O(3)   | 7947(2) | 1339(1) | 5977(2)  | 59(1) |
| O(4)   | 6405(2) | 973(1)  | 5850(2)  | 50(1) |
| C(1B)  | 845(3)  | 1412(1) | -3083(3) | 43(1) |
| C(2B)  | 1044(3) | 1661(1) | -2016(3) | 39(1) |
| C(3B)  | 2015(2) | 1487(1) | -979(2)  | 32(1) |
| C(4B)  | 2237(2) | 1667(1) | 217(2)   | 35(1) |
| C(5B)  | 2651(3) | 1330(1) | 1091(3)  | 38(1) |
| C(6B)  | 2612(2) | 965(1)  | 364(2)   | 33(1) |
| C(7B)  | 1706(2) | 1073(1) | -833(2)  | 31(1) |
| C(8B)  | 1534(2) | 833(1)  | -1920(3) | 38(1) |
| C(9B)  | 1002(3) | 446(1)  | -1850(3) | 50(1) |
| C(10B) | 2626(3) | 782(1)  | -2250(3) | 51(1) |
| C(11B) | 2250(2) | 618(1)  | 910(3)   | 35(1) |
| C(12B) | 713(3)  | 360(1)  | 1449(3)  | 52(1) |
| C(13B) | 3086(3) | 1997(1) | 459(3)   | 35(1) |
| C(14B) | 2748(3) | 2363(1) | 632(3)   | 46(1) |
| C(15B) | 3532(3) | 2668(1) | 798(3)   | 55(1) |
| C(16B) | 4641(3) | 2605(1) | 777(3)   | 50(1) |
| C(17B) | 4995(3) | 2242(1) | 621(3)   | 45(1) |
| C(18B) | 4226(2) | 1943(1) | 467(3)   | 38(1) |
| O(1B)  | 608(2)  | 1025(1) | -2872(2) | 41(1) |

|        |          |         |          |       |
|--------|----------|---------|----------|-------|
| O(2B)  | 3704(2)  | 899(1)  | 235(2)   | 41(1) |
| O(3B)  | 2847(2)  | 346(1)  | 1282(2)  | 51(1) |
| O(4B)  | 1166(2)  | 665(1)  | 939(2)   | 43(1) |
| C(1C)  | 9901(3)  | 1933(1) | 3197(3)  | 40(1) |
| C(2C)  | 9725(3)  | 1678(1) | 2144(3)  | 41(1) |
| C(3C)  | 8787(2)  | 1853(1) | 1079(2)  | 32(1) |
| C(4C)  | 8628(2)  | 1674(1) | -102(2)  | 36(1) |
| C(5C)  | 8194(3)  | 2006(1) | -992(3)  | 40(1) |
| C(6C)  | 8257(2)  | 2375(1) | -268(2)  | 32(1) |
| C(7C)  | 9116(2)  | 2266(1) | 946(2)   | 32(1) |
| C(8C)  | 9255(3)  | 2509(1) | 2026(3)  | 37(1) |
| C(9C)  | 9791(3)  | 2894(1) | 1951(3)  | 48(1) |
| C(10C) | 8156(3)  | 2562(1) | 2336(3)  | 48(1) |
| C(11C) | 8656(3)  | 2710(1) | -832(3)  | 35(1) |
| C(12C) | 10229(3) | 2951(1) | -1345(3) | 61(1) |
| C(13C) | 7837(2)  | 1328(1) | -387(2)  | 33(1) |
| C(14C) | 8243(3)  | 977(1)  | -606(3)  | 43(1) |
| C(15C) | 7505(3)  | 659(1)  | -861(3)  | 54(1) |
| C(16C) | 6373(3)  | 690(1)  | -879(3)  | 56(1) |
| C(17C) | 5949(3)  | 1039(1) | -669(3)  | 48(1) |
| C(18C) | 6676(3)  | 1353(1) | -430(3)  | 40(1) |
| O(1C)  | 10162(2) | 2318(1) | 2984(2)  | 38(1) |
| O(2C)  | 7151(2)  | 2459(1) | -188(2)  | 44(1) |

|       |         |         |          |       |
|-------|---------|---------|----------|-------|
| O(3C) | 8063(2) | 2976(1) | -1279(2) | 55(1) |
| O(4C) | 9763(2) | 2661(1) | -790(2)  | 46(1) |

---

Table 3. Bond lengths [ $\text{\AA}$ ] and angles [ $^\circ$ ] for **12**.

---

|            |          |
|------------|----------|
| C(1)-O(1)  | 1.439(3) |
| C(1)-C(2)  | 1.521(4) |
| C(1)-H(1A) | 0.9900   |
| C(1)-H(1B) | 0.9900   |
| C(2)-C(3)  | 1.518(4) |
| C(2)-H(2A) | 0.9900   |
| C(2)-H(2B) | 0.9900   |
| C(3)-C(4)  | 1.526(4) |
| C(3)-C(7)  | 1.534(3) |
| C(3)-H(3A) | 1.0000   |
| C(4)-C(13) | 1.514(3) |
| C(4)-C(5)  | 1.538(4) |
| C(4)-H(4A) | 1.0000   |
| C(5)-C(6)  | 1.561(3) |
| C(5)-H(5A) | 0.9900   |
| C(5)-H(5B) | 0.9900   |
| C(6)-O(2)  | 1.415(3) |
| C(6)-C(11) | 1.529(3) |
| C(6)-C(7)  | 1.547(4) |
| C(7)-C(8)  | 1.535(4) |
| C(7)-H(7A) | 1.0000   |

|              |          |
|--------------|----------|
| C(8)-O(1)    | 1.465(3) |
| C(8)-C(9)    | 1.513(3) |
| C(8)-C(10)   | 1.532(3) |
| C(9)-H(9A)   | 0.9800   |
| C(9)-H(9B)   | 0.9800   |
| C(9)-H(9C)   | 0.9800   |
| C(10)-H(10A) | 0.9800   |
| C(10)-H(10B) | 0.9800   |
| C(10)-H(10C) | 0.9800   |
| C(11)-O(3)   | 1.200(3) |
| C(11)-O(4)   | 1.333(3) |
| C(12)-O(4)   | 1.449(3) |
| C(12)-H(12A) | 0.9800   |
| C(12)-H(12B) | 0.9800   |
| C(12)-H(12C) | 0.9800   |
| C(13)-C(18)  | 1.386(4) |
| C(13)-C(14)  | 1.387(3) |
| C(14)-C(15)  | 1.386(4) |
| C(14)-H(14A) | 0.9500   |
| C(15)-C(16)  | 1.378(4) |
| C(15)-H(15A) | 0.9500   |
| C(16)-C(17)  | 1.384(4) |
| C(16)-H(16A) | 0.9500   |

|              |          |
|--------------|----------|
| C(17)-C(18)  | 1.398(3) |
| C(17)-H(17A) | 0.9500   |
| C(18)-H(18A) | 0.9500   |
| O(2)-H(2C)   | 0.8400   |
| C(1B)-O(1B)  | 1.435(3) |
| C(1B)-C(2B)  | 1.523(4) |
| C(1B)-H(1BA) | 0.9900   |
| C(1B)-H(1BB) | 0.9900   |
| C(2B)-C(3B)  | 1.526(4) |
| C(2B)-H(2BA) | 0.9900   |
| C(2B)-H(2BB) | 0.9900   |
| C(3B)-C(7B)  | 1.530(3) |
| C(3B)-C(4B)  | 1.534(4) |
| C(3B)-H(3BA) | 1.0000   |
| C(4B)-C(13B) | 1.510(3) |
| C(4B)-C(5B)  | 1.557(4) |
| C(4B)-H(4BA) | 1.0000   |
| C(5B)-C(6B)  | 1.556(3) |
| C(5B)-H(5BA) | 0.9900   |
| C(5B)-H(5BB) | 0.9900   |
| C(6B)-O(2B)  | 1.409(3) |
| C(6B)-C(11B) | 1.529(3) |
| C(6B)-C(7B)  | 1.542(4) |



|               |          |
|---------------|----------|
| C(7B)-C(8B)   | 1.532(4) |
| C(7B)-H(7BA)  | 1.0000   |
| C(8B)-O(1B)   | 1.471(3) |
| C(8B)-C(9B)   | 1.520(3) |
| C(8B)-C(10B)  | 1.528(4) |
| C(9B)-H(9BA)  | 0.9800   |
| C(9B)-H(9BB)  | 0.9800   |
| C(9B)-H(9BC)  | 0.9800   |
| C(10B)-H(10D) | 0.9800   |
| C(10B)-H(10E) | 0.9800   |
| C(10B)-H(10F) | 0.9800   |
| C(11B)-O(3B)  | 1.192(3) |
| C(11B)-O(4B)  | 1.341(3) |
| C(12B)-O(4B)  | 1.446(3) |
| C(12B)-H(12D) | 0.9800   |
| C(12B)-H(12E) | 0.9800   |
| C(12B)-H(12F) | 0.9800   |
| C(13B)-C(14B) | 1.390(3) |
| C(13B)-C(18B) | 1.395(4) |
| C(14B)-C(15B) | 1.402(4) |
| C(14B)-H(14B) | 0.9500   |
| C(15B)-C(16B) | 1.375(5) |
| C(15B)-H(15B) | 0.9500   |

|               |          |
|---------------|----------|
| C(16B)-C(17B) | 1.379(4) |
| C(16B)-H(16B) | 0.9500   |
| C(17B)-C(18B) | 1.375(4) |
| C(17B)-H(17B) | 0.9500   |
| C(18B)-H(18B) | 0.9500   |
| O(2B)-H(2BC)  | 0.8400   |
| C(1C)-O(1C)   | 1.432(3) |
| C(1C)-C(2C)   | 1.527(4) |
| C(1C)-H(1CA)  | 0.9900   |
| C(1C)-H(1CB)  | 0.9900   |
| C(2C)-C(3C)   | 1.529(4) |
| C(2C)-H(2CA)  | 0.9900   |
| C(2C)-H(2CB)  | 0.9900   |
| C(3C)-C(7C)   | 1.530(3) |
| C(3C)-C(4C)   | 1.531(4) |
| C(3C)-H(3CA)  | 1.0000   |
| C(4C)-C(13C)  | 1.513(3) |
| C(4C)-C(5C)   | 1.558(4) |
| C(4C)-H(4CA)  | 1.0000   |
| C(5C)-C(6C)   | 1.560(3) |
| C(5C)-H(5CA)  | 0.9900   |
| C(5C)-H(5CB)  | 0.9900   |
| C(6C)-O(2C)   | 1.413(3) |

|               |          |
|---------------|----------|
| C(6C)-C(11C)  | 1.530(3) |
| C(6C)-C(7C)   | 1.537(4) |
| C(7C)-C(8C)   | 1.538(4) |
| C(7C)-H(7CA)  | 1.0000   |
| C(8C)-O(1C)   | 1.462(4) |
| C(8C)-C(9C)   | 1.518(3) |
| C(8C)-C(10C)  | 1.525(4) |
| C(9C)-H(9CA)  | 0.9800   |
| C(9C)-H(9CB)  | 0.9800   |
| C(9C)-H(9CC)  | 0.9800   |
| C(10C)-H(10G) | 0.9800   |
| C(10C)-H(10H) | 0.9800   |
| C(10C)-H(10I) | 0.9800   |
| C(11C)-O(3C)  | 1.190(3) |
| C(11C)-O(4C)  | 1.340(3) |
| C(12C)-O(4C)  | 1.450(3) |
| C(12C)-H(12G) | 0.9800   |
| C(12C)-H(12H) | 0.9800   |
| C(12C)-H(12I) | 0.9800   |
| C(13C)-C(14C) | 1.391(3) |
| C(13C)-C(18C) | 1.396(4) |
| C(14C)-C(15C) | 1.397(4) |
| C(14C)-H(14C) | 0.9500   |

|                  |          |
|------------------|----------|
| C(15C)-C(16C)    | 1.373(5) |
| C(15C)-H(15C)    | 0.9500   |
| C(16C)-C(17C)    | 1.388(5) |
| C(16C)-H(16C)    | 0.9500   |
| C(17C)-C(18C)    | 1.379(4) |
| C(17C)-H(17C)    | 0.9500   |
| C(18C)-H(18C)    | 0.9500   |
| O(2C)-H(2CC)     | 0.8400   |
| O(1)-C(1)-C(2)   | 111.8(2) |
| O(1)-C(1)-H(1A)  | 109.3    |
| C(2)-C(1)-H(1A)  | 109.3    |
| O(1)-C(1)-H(1B)  | 109.3    |
| C(2)-C(1)-H(1B)  | 109.3    |
| H(1A)-C(1)-H(1B) | 107.9    |
| C(3)-C(2)-C(1)   | 109.7(2) |
| C(3)-C(2)-H(2A)  | 109.7    |
| C(1)-C(2)-H(2A)  | 109.7    |
| C(3)-C(2)-H(2B)  | 109.7    |
| C(1)-C(2)-H(2B)  | 109.7    |
| H(2A)-C(2)-H(2B) | 108.2    |
| C(2)-C(3)-C(4)   | 117.7(2) |
| C(2)-C(3)-C(7)   | 109.3(2) |

|                  |            |
|------------------|------------|
| C(4)-C(3)-C(7)   | 102.51(19) |
| C(2)-C(3)-H(3A)  | 109.0      |
| C(4)-C(3)-H(3A)  | 109.0      |
| C(7)-C(3)-H(3A)  | 109.0      |
| C(13)-C(4)-C(3)  | 114.4(2)   |
| C(13)-C(4)-C(5)  | 115.3(2)   |
| C(3)-C(4)-C(5)   | 102.7(2)   |
| C(13)-C(4)-H(4A) | 108.0      |
| C(3)-C(4)-H(4A)  | 108.0      |
| C(5)-C(4)-H(4A)  | 108.0      |
| C(4)-C(5)-C(6)   | 107.4(2)   |
| C(4)-C(5)-H(5A)  | 110.2      |
| C(6)-C(5)-H(5A)  | 110.2      |
| C(4)-C(5)-H(5B)  | 110.2      |
| C(6)-C(5)-H(5B)  | 110.2      |
| H(5A)-C(5)-H(5B) | 108.5      |
| O(2)-C(6)-C(11)  | 109.6(2)   |
| O(2)-C(6)-C(7)   | 110.8(2)   |
| C(11)-C(6)-C(7)  | 111.0(2)   |
| O(2)-C(6)-C(5)   | 110.9(2)   |
| C(11)-C(6)-C(5)  | 110.8(2)   |
| C(7)-C(6)-C(5)   | 103.6(2)   |
| C(3)-C(7)-C(8)   | 112.9(2)   |

|                     |            |
|---------------------|------------|
| C(3)-C(7)-C(6)      | 104.9(2)   |
| C(8)-C(7)-C(6)      | 122.2(2)   |
| C(3)-C(7)-H(7A)     | 105.1      |
| C(8)-C(7)-H(7A)     | 105.1      |
| C(6)-C(7)-H(7A)     | 105.1      |
| O(1)-C(8)-C(9)      | 103.9(2)   |
| O(1)-C(8)-C(10)     | 109.3(2)   |
| C(9)-C(8)-C(10)     | 110.5(2)   |
| O(1)-C(8)-C(7)      | 105.21(19) |
| C(9)-C(8)-C(7)      | 111.7(2)   |
| C(10)-C(8)-C(7)     | 115.4(2)   |
| C(8)-C(9)-H(9A)     | 109.5      |
| C(8)-C(9)-H(9B)     | 109.5      |
| H(9A)-C(9)-H(9B)    | 109.5      |
| C(8)-C(9)-H(9C)     | 109.5      |
| H(9A)-C(9)-H(9C)    | 109.5      |
| H(9B)-C(9)-H(9C)    | 109.5      |
| C(8)-C(10)-H(10A)   | 109.5      |
| C(8)-C(10)-H(10B)   | 109.5      |
| H(10A)-C(10)-H(10B) | 109.5      |
| C(8)-C(10)-H(10C)   | 109.5      |
| H(10A)-C(10)-H(10C) | 109.5      |
| H(10B)-C(10)-H(10C) | 109.5      |

|                     |          |
|---------------------|----------|
| O(3)-C(11)-O(4)     | 123.6(2) |
| O(3)-C(11)-C(6)     | 125.6(2) |
| O(4)-C(11)-C(6)     | 110.8(2) |
| O(4)-C(12)-H(12A)   | 109.5    |
| O(4)-C(12)-H(12B)   | 109.5    |
| H(12A)-C(12)-H(12B) | 109.5    |
| O(4)-C(12)-H(12C)   | 109.5    |
| H(12A)-C(12)-H(12C) | 109.5    |
| H(12B)-C(12)-H(12C) | 109.5    |
| C(18)-C(13)-C(14)   | 117.9(2) |
| C(18)-C(13)-C(4)    | 122.0(2) |
| C(14)-C(13)-C(4)    | 120.1(2) |
| C(15)-C(14)-C(13)   | 121.3(3) |
| C(15)-C(14)-H(14A)  | 119.3    |
| C(13)-C(14)-H(14A)  | 119.3    |
| C(16)-C(15)-C(14)   | 120.3(3) |
| C(16)-C(15)-H(15A)  | 119.8    |
| C(14)-C(15)-H(15A)  | 119.8    |
| C(15)-C(16)-C(17)   | 119.5(3) |
| C(15)-C(16)-H(16A)  | 120.3    |
| C(17)-C(16)-H(16A)  | 120.3    |
| C(16)-C(17)-C(18)   | 119.8(3) |
| C(16)-C(17)-H(17A)  | 120.1    |

|                     |          |
|---------------------|----------|
| C(18)-C(17)-H(17A)  | 120.1    |
| C(13)-C(18)-C(17)   | 121.2(2) |
| C(13)-C(18)-H(18A)  | 119.4    |
| C(17)-C(18)-H(18A)  | 119.4    |
| C(1)-O(1)-C(8)      | 115.4(2) |
| C(6)-O(2)-H(2C)     | 109.5    |
| C(11)-O(4)-C(12)    | 116.4(2) |
| O(1B)-C(1B)-C(2B)   | 111.7(2) |
| O(1B)-C(1B)-H(1BA)  | 109.3    |
| C(2B)-C(1B)-H(1BA)  | 109.3    |
| O(1B)-C(1B)-H(1BB)  | 109.3    |
| C(2B)-C(1B)-H(1BB)  | 109.3    |
| H(1BA)-C(1B)-H(1BB) | 107.9    |
| C(1B)-C(2B)-C(3B)   | 109.2(2) |
| C(1B)-C(2B)-H(2BA)  | 109.8    |
| C(3B)-C(2B)-H(2BA)  | 109.8    |
| C(1B)-C(2B)-H(2BB)  | 109.8    |
| C(3B)-C(2B)-H(2BB)  | 109.8    |
| H(2BA)-C(2B)-H(2BB) | 108.3    |
| C(2B)-C(3B)-C(7B)   | 109.3(2) |
| C(2B)-C(3B)-C(4B)   | 117.2(2) |
| C(7B)-C(3B)-C(4B)   | 104.3(2) |
| C(2B)-C(3B)-H(3BA)  | 108.6    |



|                     |            |
|---------------------|------------|
| C(7B)-C(3B)-H(3BA)  | 108.6      |
| C(4B)-C(3B)-H(3BA)  | 108.6      |
| C(13B)-C(4B)-C(3B)  | 112.5(2)   |
| C(13B)-C(4B)-C(5B)  | 114.6(2)   |
| C(3B)-C(4B)-C(5B)   | 104.64(19) |
| C(13B)-C(4B)-H(4BA) | 108.3      |
| C(3B)-C(4B)-H(4BA)  | 108.3      |
| C(5B)-C(4B)-H(4BA)  | 108.3      |
| C(6B)-C(5B)-C(4B)   | 107.1(2)   |
| C(6B)-C(5B)-H(5BA)  | 110.3      |
| C(4B)-C(5B)-H(5BA)  | 110.3      |
| C(6B)-C(5B)-H(5BB)  | 110.3      |
| C(4B)-C(5B)-H(5BB)  | 110.3      |
| H(5BA)-C(5B)-H(5BB) | 108.5      |
| O(2B)-C(6B)-C(11B)  | 110.3(2)   |
| O(2B)-C(6B)-C(7B)   | 108.5(2)   |
| C(11B)-C(6B)-C(7B)  | 113.3(2)   |
| O(2B)-C(6B)-C(5B)   | 111.1(2)   |
| C(11B)-C(6B)-C(5B)  | 111.1(2)   |
| C(7B)-C(6B)-C(5B)   | 102.2(2)   |
| C(3B)-C(7B)-C(8B)   | 112.7(2)   |
| C(3B)-C(7B)-C(6B)   | 102.9(2)   |
| C(8B)-C(7B)-C(6B)   | 121.9(2)   |

|                      |            |
|----------------------|------------|
| C(3B)-C(7B)-H(7BA)   | 106.1      |
| C(8B)-C(7B)-H(7BA)   | 106.1      |
| C(6B)-C(7B)-H(7BA)   | 106.1      |
| O(1B)-C(8B)-C(9B)    | 103.5(2)   |
| O(1B)-C(8B)-C(10B)   | 109.6(2)   |
| C(9B)-C(8B)-C(10B)   | 109.8(2)   |
| O(1B)-C(8B)-C(7B)    | 105.70(19) |
| C(9B)-C(8B)-C(7B)    | 111.9(2)   |
| C(10B)-C(8B)-C(7B)   | 115.6(2)   |
| C(8B)-C(9B)-H(9BA)   | 109.5      |
| C(8B)-C(9B)-H(9BB)   | 109.5      |
| H(9BA)-C(9B)-H(9BB)  | 109.5      |
| C(8B)-C(9B)-H(9BC)   | 109.5      |
| H(9BA)-C(9B)-H(9BC)  | 109.5      |
| H(9BB)-C(9B)-H(9BC)  | 109.5      |
| C(8B)-C(10B)-H(10D)  | 109.5      |
| C(8B)-C(10B)-H(10E)  | 109.5      |
| H(10D)-C(10B)-H(10E) | 109.5      |
| C(8B)-C(10B)-H(10F)  | 109.5      |
| H(10D)-C(10B)-H(10F) | 109.5      |
| H(10E)-C(10B)-H(10F) | 109.5      |
| O(3B)-C(11B)-O(4B)   | 124.0(2)   |
| O(3B)-C(11B)-C(6B)   | 125.4(2)   |

O(4B)-C(11B)-C(6B) 110.6(2)  
O(4B)-C(12B)-H(12D) 109.5  
O(4B)-C(12B)-H(12E) 109.5  
H(12D)-C(12B)-H(12E) 109.5  
O(4B)-C(12B)-H(12F) 109.5  
H(12D)-C(12B)-H(12F) 109.5  
H(12E)-C(12B)-H(12F) 109.5  
C(14B)-C(13B)-C(18B) 118.1(2)  
C(14B)-C(13B)-C(4B) 121.6(2)  
C(18B)-C(13B)-C(4B) 120.3(2)  
C(13B)-C(14B)-C(15B) 120.6(3)  
C(13B)-C(14B)-H(14B) 119.7  
C(15B)-C(14B)-H(14B) 119.7  
C(16B)-C(15B)-C(14B) 119.5(3)  
C(16B)-C(15B)-H(15B) 120.3  
C(14B)-C(15B)-H(15B) 120.3  
C(15B)-C(16B)-C(17B) 120.6(3)  
C(15B)-C(16B)-H(16B) 119.7  
C(17B)-C(16B)-H(16B) 119.7  
C(18B)-C(17B)-C(16B) 119.7(3)  
C(18B)-C(17B)-H(17B) 120.2  
C(16B)-C(17B)-H(17B) 120.2  
C(17B)-C(18B)-C(13B) 121.5(2)

C(17B)-C(18B)-H(18B) 119.3  
C(13B)-C(18B)-H(18B) 119.3  
C(1B)-O(1B)-C(8B) 115.7(2)  
C(6B)-O(2B)-H(2BC) 109.5  
C(11B)-O(4B)-C(12B) 116.7(2)  
O(1C)-C(1C)-C(2C) 111.9(2)  
O(1C)-C(1C)-H(1CA) 109.2  
C(2C)-C(1C)-H(1CA) 109.2  
O(1C)-C(1C)-H(1CB) 109.2  
C(2C)-C(1C)-H(1CB) 109.2  
H(1CA)-C(1C)-H(1CB) 107.9  
C(1C)-C(2C)-C(3C) 109.2(2)  
C(1C)-C(2C)-H(2CA) 109.8  
C(3C)-C(2C)-H(2CA) 109.8  
C(1C)-C(2C)-H(2CB) 109.8  
C(3C)-C(2C)-H(2CB) 109.8  
H(2CA)-C(2C)-H(2CB) 108.3  
C(2C)-C(3C)-C(7C) 109.2(2)  
C(2C)-C(3C)-C(4C) 116.9(2)  
C(7C)-C(3C)-C(4C) 103.8(2)  
C(2C)-C(3C)-H(3CA) 108.9  
C(7C)-C(3C)-H(3CA) 108.9  
C(4C)-C(3C)-H(3CA) 108.9

|                     |            |
|---------------------|------------|
| C(13C)-C(4C)-C(3C)  | 114.0(2)   |
| C(13C)-C(4C)-C(5C)  | 114.1(2)   |
| C(3C)-C(4C)-C(5C)   | 104.82(19) |
| C(13C)-C(4C)-H(4CA) | 107.8      |
| C(3C)-C(4C)-H(4CA)  | 107.8      |
| C(5C)-C(4C)-H(4CA)  | 107.8      |
| C(4C)-C(5C)-C(6C)   | 106.7(2)   |
| C(4C)-C(5C)-H(5CA)  | 110.4      |
| C(6C)-C(5C)-H(5CA)  | 110.4      |
| C(4C)-C(5C)-H(5CB)  | 110.4      |
| C(6C)-C(5C)-H(5CB)  | 110.4      |
| H(5CA)-C(5C)-H(5CB) | 108.6      |
| O(2C)-C(6C)-C(11C)  | 109.4(2)   |
| O(2C)-C(6C)-C(7C)   | 108.7(2)   |
| C(11C)-C(6C)-C(7C)  | 114.6(2)   |
| O(2C)-C(6C)-C(5C)   | 110.9(2)   |
| C(11C)-C(6C)-C(5C)  | 110.1(2)   |
| C(7C)-C(6C)-C(5C)   | 103.0(2)   |
| C(3C)-C(7C)-C(6C)   | 103.1(2)   |
| C(3C)-C(7C)-C(8C)   | 112.8(2)   |
| C(6C)-C(7C)-C(8C)   | 122.0(2)   |
| C(3C)-C(7C)-H(7CA)  | 105.9      |
| C(6C)-C(7C)-H(7CA)  | 105.9      |

|                      |            |
|----------------------|------------|
| C(8C)-C(7C)-H(7CA)   | 105.9      |
| O(1C)-C(8C)-C(9C)    | 104.0(2)   |
| O(1C)-C(8C)-C(10C)   | 109.4(2)   |
| C(9C)-C(8C)-C(10C)   | 109.8(2)   |
| O(1C)-C(8C)-C(7C)    | 105.15(19) |
| C(9C)-C(8C)-C(7C)    | 111.2(2)   |
| C(10C)-C(8C)-C(7C)   | 116.4(2)   |
| C(8C)-C(9C)-H(9CA)   | 109.5      |
| C(8C)-C(9C)-H(9CB)   | 109.5      |
| H(9CA)-C(9C)-H(9CB)  | 109.5      |
| C(8C)-C(9C)-H(9CC)   | 109.5      |
| H(9CA)-C(9C)-H(9CC)  | 109.5      |
| H(9CB)-C(9C)-H(9CC)  | 109.5      |
| C(8C)-C(10C)-H(10G)  | 109.5      |
| C(8C)-C(10C)-H(10H)  | 109.5      |
| H(10G)-C(10C)-H(10H) | 109.5      |
| C(8C)-C(10C)-H(10I)  | 109.5      |
| H(10G)-C(10C)-H(10I) | 109.5      |
| H(10H)-C(10C)-H(10I) | 109.5      |
| O(3C)-C(11C)-O(4C)   | 123.8(2)   |
| O(3C)-C(11C)-C(6C)   | 125.3(2)   |
| O(4C)-C(11C)-C(6C)   | 110.9(2)   |
| O(4C)-C(12C)-H(12G)  | 109.5      |

O(4C)-C(12C)-H(12H) 109.5  
H(12G)-C(12C)-H(12H) 109.5  
O(4C)-C(12C)-H(12I) 109.5  
H(12G)-C(12C)-H(12I) 109.5  
H(12H)-C(12C)-H(12I) 109.5  
C(14C)-C(13C)-C(18C) 118.2(2)  
C(14C)-C(13C)-C(4C) 121.2(2)  
C(18C)-C(13C)-C(4C) 120.6(2)  
C(13C)-C(14C)-C(15C) 120.6(3)  
C(13C)-C(14C)-H(14C) 119.7  
C(15C)-C(14C)-H(14C) 119.7  
C(16C)-C(15C)-C(14C) 120.0(3)  
C(16C)-C(15C)-H(15C) 120.0  
C(14C)-C(15C)-H(15C) 120.0  
C(15C)-C(16C)-C(17C) 120.2(3)  
C(15C)-C(16C)-H(16C) 119.9  
C(17C)-C(16C)-H(16C) 119.9  
C(18C)-C(17C)-C(16C) 119.6(3)  
C(18C)-C(17C)-H(17C) 120.2  
C(16C)-C(17C)-H(17C) 120.2  
C(17C)-C(18C)-C(13C) 121.4(3)  
C(17C)-C(18C)-H(18C) 119.3  
C(13C)-C(18C)-H(18C) 119.3

C(1C)-O(1C)-C(8C) 115.4(2)

C(6C)-O(2C)-H(2CC) 109.5

C(11C)-O(4C)-C(12C) 116.4(2)

---

Symmetry transformations used to generate equivalent atoms:



Table 4. Anisotropic displacement parameters ( $\text{\AA}^2 \times 10^3$ ) for 12. The anisotropic displacement factor exponent takes the form:  $-2h^2 [ h^2 a^{*2} U^{11} + \dots + 2 h k a^* b^* U^{12} ]$

|       | U <sup>11</sup> | U <sup>22</sup> | U <sup>33</sup> | U <sup>23</sup> | U <sup>13</sup> | U <sup>12</sup> |
|-------|-----------------|-----------------|-----------------|-----------------|-----------------|-----------------|
| C(1)  | 46(2)           | 26(1)           | 46(2)           | -5(1)           | 22(1)           | 2(1)            |
| C(2)  | 38(2)           | 25(1)           | 47(2)           | -5(1)           | 21(1)           | -2(1)           |
| C(3)  | 37(1)           | 22(1)           | 43(2)           | -2(1)           | 25(1)           | 1(1)            |
| C(4)  | 39(2)           | 27(1)           | 45(2)           | 0(1)            | 26(1)           | 3(1)            |
| C(5)  | 59(2)           | 25(1)           | 45(2)           | 0(1)            | 26(2)           | 1(1)            |
| C(6)  | 38(2)           | 25(1)           | 41(2)           | -2(1)           | 21(1)           | -2(1)           |
| C(7)  | 37(1)           | 22(1)           | 39(2)           | -3(1)           | 22(1)           | 0(1)            |
| C(8)  | 41(2)           | 25(1)           | 47(2)           | 1(1)            | 23(1)           | -2(1)           |
| C(9)  | 70(2)           | 24(1)           | 55(2)           | 3(1)            | 24(2)           | -1(1)           |
| C(10) | 45(2)           | 48(2)           | 47(2)           | 5(1)            | 27(2)           | -4(1)           |
| C(11) | 43(2)           | 28(1)           | 40(2)           | -2(1)           | 19(1)           | -1(1)           |
| C(12) | 78(3)           | 63(2)           | 62(2)           | -14(2)          | 40(2)           | 20(2)           |
| C(13) | 49(2)           | 23(1)           | 40(2)           | -1(1)           | 26(1)           | 0(1)            |
| C(14) | 45(2)           | 37(1)           | 57(2)           | 6(1)            | 33(2)           | 4(1)            |
| C(15) | 53(2)           | 37(2)           | 61(2)           | 10(1)           | 28(2)           | -7(1)           |
| C(16) | 61(2)           | 26(1)           | 51(2)           | 6(1)            | 22(2)           | 3(1)            |
| C(17) | 50(2)           | 32(1)           | 54(2)           | 4(1)            | 28(2)           | 11(1)           |
| C(18) | 47(2)           | 31(1)           | 48(2)           | 4(1)            | 30(2)           | 1(1)            |

|        |       |       |       |        |       |        |
|--------|-------|-------|-------|--------|-------|--------|
| O(1)   | 44(1) | 26(1) | 43(1) | -1(1)  | 18(1) | 1(1)   |
| O(2)   | 40(1) | 45(1) | 48(1) | -6(1)  | 24(1) | -5(1)  |
| O(3)   | 74(2) | 29(1) | 86(2) | -16(1) | 40(2) | -10(1) |
| O(4)   | 57(1) | 46(1) | 61(2) | -17(1) | 39(1) | -2(1)  |
| C(1B)  | 50(2) | 30(1) | 50(2) | 4(1)   | 21(2) | -8(1)  |
| C(2B)  | 47(2) | 25(1) | 49(2) | 6(1)   | 22(2) | -1(1)  |
| C(3B)  | 38(2) | 22(1) | 45(2) | 0(1)   | 24(1) | -4(1)  |
| C(4B)  | 40(2) | 25(1) | 51(2) | -2(1)  | 30(1) | -2(1)  |
| C(5B)  | 53(2) | 28(1) | 43(2) | -1(1)  | 27(2) | -8(1)  |
| C(6B)  | 37(2) | 26(1) | 44(2) | 3(1)   | 26(1) | -1(1)  |
| C(7B)  | 35(1) | 21(1) | 45(2) | 1(1)   | 23(1) | -3(1)  |
| C(8B)  | 43(2) | 25(1) | 48(2) | -1(1)  | 19(1) | 2(1)   |
| C(9B)  | 61(2) | 26(1) | 57(2) | -2(1)  | 13(2) | -5(1)  |
| C(10B) | 53(2) | 53(2) | 53(2) | -14(2) | 28(2) | 7(1)   |
| C(11B) | 44(2) | 25(1) | 43(2) | 3(1)   | 26(1) | -1(1)  |
| C(12B) | 61(2) | 43(2) | 66(2) | 13(2)  | 39(2) | -12(1) |
| C(13B) | 50(2) | 21(1) | 43(2) | -1(1)  | 29(2) | -2(1)  |
| C(14B) | 56(2) | 30(1) | 58(2) | -4(1)  | 30(2) | 5(1)   |
| C(15B) | 81(3) | 24(1) | 66(2) | -5(1)  | 34(2) | -3(1)  |
| C(16B) | 65(2) | 39(2) | 50(2) | -4(1)  | 26(2) | -21(1) |
| C(17B) | 49(2) | 46(2) | 48(2) | -5(1)  | 28(2) | -11(1) |
| C(18B) | 46(2) | 32(1) | 46(2) | -5(1)  | 29(2) | -6(1)  |
| O(1B)  | 50(1) | 27(1) | 49(1) | 2(1)   | 19(1) | -3(1)  |

|        |       |       |       |       |       |        |
|--------|-------|-------|-------|-------|-------|--------|
| O(2B)  | 37(1) | 47(1) | 49(1) | 6(1)  | 26(1) | 3(1)   |
| O(3B)  | 58(1) | 32(1) | 71(2) | 14(1) | 33(1) | 8(1)   |
| O(4B)  | 46(1) | 34(1) | 60(1) | 13(1) | 34(1) | -1(1)  |
| C(1C)  | 47(2) | 31(1) | 43(2) | 4(1)  | 19(2) | -3(1)  |
| C(2C)  | 54(2) | 26(1) | 47(2) | 5(1)  | 25(2) | 0(1)   |
| C(3C)  | 40(2) | 23(1) | 41(2) | 0(1)  | 24(1) | -3(1)  |
| C(4C)  | 43(2) | 24(1) | 51(2) | -3(1) | 31(2) | -3(1)  |
| C(5C)  | 56(2) | 30(1) | 40(2) | 0(1)  | 25(2) | -7(1)  |
| C(6C)  | 36(2) | 25(1) | 45(2) | 3(1)  | 25(1) | 0(1)   |
| C(7C)  | 38(2) | 22(1) | 43(2) | 0(1)  | 24(1) | -2(1)  |
| C(8C)  | 45(2) | 25(1) | 46(2) | -2(1) | 22(2) | 2(1)   |
| C(9C)  | 60(2) | 28(1) | 54(2) | -3(1) | 17(2) | -5(1)  |
| C(10C) | 50(2) | 49(2) | 53(2) | -8(1) | 27(2) | 10(1)  |
| C(11C) | 46(2) | 25(1) | 43(2) | 0(1)  | 25(1) | 0(1)   |
| C(12C) | 69(2) | 61(2) | 65(2) | 14(2) | 41(2) | -19(2) |
| C(13C) | 45(2) | 23(1) | 41(2) | -1(1) | 27(1) | -3(1)  |
| C(14C) | 49(2) | 32(1) | 55(2) | -3(1) | 28(2) | 3(1)   |
| C(15C) | 78(2) | 27(1) | 61(2) | -7(1) | 30(2) | -4(1)  |
| C(16C) | 72(2) | 47(2) | 51(2) | -3(2) | 26(2) | -29(2) |
| C(17C) | 46(2) | 61(2) | 44(2) | -4(2) | 23(2) | -16(1) |
| C(18C) | 48(2) | 36(1) | 49(2) | -6(1) | 32(2) | -5(1)  |
| O(1C)  | 42(1) | 29(1) | 45(1) | 2(1)  | 18(1) | -1(1)  |
| O(2C)  | 35(1) | 59(1) | 46(1) | 7(1)  | 23(1) | 6(1)   |

|       |       |       |       |       |       |       |
|-------|-------|-------|-------|-------|-------|-------|
| O(3C) | 71(2) | 31(1) | 72(2) | 17(1) | 39(1) | 15(1) |
| O(4C) | 45(1) | 46(1) | 58(1) | 16(1) | 32(1) | -3(1) |

---

Table 5. Hydrogen coordinates ( $\times 10^4$ ) and isotropic displacement parameters ( $\text{\AA}^2 \times 10^3$ ) for **12**.

|        | x    | y    | z    | U(eq) |
|--------|------|------|------|-------|
| H(1A)  | 6408 | 158  | 1549 | 45    |
| H(1B)  | 5003 | 166  | 1142 | 45    |
| H(2A)  | 5082 | 87   | 3061 | 42    |
| H(2B)  | 5854 | -243 | 2784 | 42    |
| H(3A)  | 7601 | 87   | 3746 | 37    |
| H(4A)  | 6204 | 105  | 5205 | 41    |
| H(5A)  | 8682 | 230  | 6122 | 49    |
| H(5B)  | 7701 | 399  | 6587 | 49    |
| H(7A)  | 6090 | 670  | 4027 | 37    |
| H(9A)  | 5897 | 1261 | 3040 | 73    |
| H(9B)  | 6443 | 1324 | 2045 | 73    |
| H(9C)  | 7272 | 1346 | 3385 | 73    |
| H(10A) | 7798 | 857  | 1736 | 66    |
| H(10B) | 7972 | 450  | 2353 | 66    |
| H(10C) | 8609 | 816  | 3077 | 66    |
| H(12A) | 5227 | 1183 | 6489 | 95    |
| H(12B) | 5832 | 1501 | 5953 | 95    |

|        |      |       |       |    |
|--------|------|-------|-------|----|
| H(12C) | 6547 | 1316  | 7193  | 95 |
| H(14A) | 5748 | -500  | 5622  | 51 |
| H(15A) | 6157 | -1141 | 6026  | 57 |
| H(16A) | 7916 | -1400 | 6011  | 55 |
| H(17A) | 9294 | -1008 | 5634  | 51 |
| H(18A) | 8884 | -361  | 5245  | 46 |
| H(2C)  | 9378 | 856   | 5667  | 63 |
| H(1BA) | 174  | 1514  | -3741 | 51 |
| H(1BB) | 1552 | 1421  | -3306 | 51 |
| H(2BA) | 308  | 1680  | -1845 | 47 |
| H(2BB) | 1273 | 1921  | -2165 | 47 |
| H(3BA) | 2766 | 1492  | -1140 | 39 |
| H(4BA) | 1471 | 1762  | 239   | 42 |
| H(5BA) | 3461 | 1376  | 1639  | 46 |
| H(5BB) | 2125 | 1302  | 1543  | 46 |
| H(7BA) | 924  | 1079  | -733  | 37 |
| H(9BA) | 298  | 480   | -1645 | 75 |
| H(9BB) | 1577 | 291   | -1255 | 75 |
| H(9BC) | 786  | 318   | -2605 | 75 |
| H(10D) | 2430 | 623   | -2947 | 76 |
| H(10E) | 3249 | 659   | -1607 | 76 |
| H(10F) | 2898 | 1031  | -2406 | 76 |
| H(12D) | -81  | 424   | 1422  | 78 |

|        |       |      |       |    |
|--------|-------|------|-------|----|
| H(12E) | 1229  | 323  | 2260  | 78 |
| H(12F) | 685   | 124  | 1013  | 78 |
| H(14B) | 1979  | 2407 | 638   | 55 |
| H(15B) | 3300  | 2918 | 925   | 66 |
| H(16B) | 5167  | 2812 | 871   | 60 |
| H(17B) | 5767  | 2200 | 621   | 54 |
| H(18B) | 4476  | 1694 | 363   | 45 |
| H(2BC) | 4193  | 823  | 869   | 62 |
| H(1CA) | 9178  | 1930 | 3394  | 48 |
| H(1CB) | 10553 | 1832 | 3873  | 48 |
| H(2CA) | 9475  | 1421 | 2292  | 49 |
| H(2CB) | 10475 | 1653 | 2003  | 49 |
| H(3CA) | 8015  | 1849 | 1199  | 39 |
| H(4CA) | 9421  | 1593 | -92   | 43 |
| H(5CA) | 7376  | 1959 | -1520 | 48 |
| H(5CB) | 8702  | 2029 | -1465 | 48 |
| H(7CA) | 9913  | 2257 | 880   | 38 |
| H(9CA) | 9861  | 3044 | 2644  | 72 |
| H(9CB) | 9286  | 3029 | 1256  | 72 |
| H(9CC) | 10573 | 2858 | 1904  | 72 |
| H(10G) | 8342  | 2724 | 3026  | 72 |
| H(10H) | 7881  | 2314 | 2497  | 72 |
| H(10I) | 7539  | 2683 | 1683  | 72 |

|        |       |      |       |    |
|--------|-------|------|-------|----|
| H(12G) | 11040 | 2887 | -1262 | 91 |
| H(12H) | 10218 | 3198 | -977  | 91 |
| H(12I) | 9745  | 2966 | -2173 | 91 |
| H(14C) | 9030  | 952  | -583  | 52 |
| H(15C) | 7786  | 421  | -1022 | 65 |
| H(16C) | 5878  | 472  | -1035 | 67 |
| H(17C) | 5163  | 1061 | -690  | 58 |
| H(18C) | 6381  | 1591 | -292  | 48 |
| H(2CC) | 6676  | 2520 | -846  | 66 |

---



Table 6. Torsion angles [ $^{\circ}$ ] for **12**.

---

|                      |             |
|----------------------|-------------|
| O(1)-C(1)-C(2)-C(3)  | -54.1(3)    |
| C(1)-C(2)-C(3)-C(4)  | 169.13(19)  |
| C(1)-C(2)-C(3)-C(7)  | 52.9(2)     |
| C(2)-C(3)-C(4)-C(13) | 72.6(3)     |
| C(7)-C(3)-C(4)-C(13) | -167.5(2)   |
| C(2)-C(3)-C(4)-C(5)  | -161.6(2)   |
| C(7)-C(3)-C(4)-C(5)  | -41.7(2)    |
| C(13)-C(4)-C(5)-C(6) | 152.1(2)    |
| C(3)-C(4)-C(5)-C(6)  | 26.9(2)     |
| C(4)-C(5)-C(6)-O(2)  | -120.6(2)   |
| C(4)-C(5)-C(6)-C(11) | 117.5(2)    |
| C(4)-C(5)-C(6)-C(7)  | -1.7(2)     |
| C(2)-C(3)-C(7)-C(8)  | -57.5(3)    |
| C(4)-C(3)-C(7)-C(8)  | 177.0(2)    |
| C(2)-C(3)-C(7)-C(6)  | 167.14(18)  |
| C(4)-C(3)-C(7)-C(6)  | 41.6(2)     |
| O(2)-C(6)-C(7)-C(3)  | 94.7(2)     |
| C(11)-C(6)-C(7)-C(3) | -143.27(19) |
| C(5)-C(6)-C(7)-C(3)  | -24.3(2)    |
| O(2)-C(6)-C(7)-C(8)  | -35.4(3)    |
| C(11)-C(6)-C(7)-C(8) | 86.6(3)     |

|                         |             |
|-------------------------|-------------|
| C(5)-C(6)-C(7)-C(8)     | -154.4(2)   |
| C(3)-C(7)-C(8)-O(1)     | 57.5(3)     |
| C(6)-C(7)-C(8)-O(1)     | -175.89(19) |
| C(3)-C(7)-C(8)-C(9)     | 169.6(2)    |
| C(6)-C(7)-C(8)-C(9)     | -63.8(3)    |
| C(3)-C(7)-C(8)-C(10)    | -63.1(3)    |
| C(6)-C(7)-C(8)-C(10)    | 63.5(3)     |
| O(2)-C(6)-C(11)-O(3)    | 0.4(4)      |
| C(7)-C(6)-C(11)-O(3)    | -122.3(3)   |
| C(5)-C(6)-C(11)-O(3)    | 123.1(3)    |
| O(2)-C(6)-C(11)-O(4)    | -177.8(2)   |
| C(7)-C(6)-C(11)-O(4)    | 59.5(3)     |
| C(5)-C(6)-C(11)-O(4)    | -55.1(3)    |
| C(3)-C(4)-C(13)-C(18)   | 62.6(4)     |
| C(5)-C(4)-C(13)-C(18)   | -56.3(4)    |
| C(3)-C(4)-C(13)-C(14)   | -115.4(3)   |
| C(5)-C(4)-C(13)-C(14)   | 125.7(3)    |
| C(18)-C(13)-C(14)-C(15) | 0.5(5)      |
| C(4)-C(13)-C(14)-C(15)  | 178.6(3)    |
| C(13)-C(14)-C(15)-C(16) | -0.8(5)     |
| C(14)-C(15)-C(16)-C(17) | 0.8(5)      |
| C(15)-C(16)-C(17)-C(18) | -0.5(5)     |
| C(14)-C(13)-C(18)-C(17) | -0.2(5)     |

|                          |             |
|--------------------------|-------------|
| C(4)-C(13)-C(18)-C(17)   | -178.2(3)   |
| C(16)-C(17)-C(18)-C(13)  | 0.2(5)      |
| C(2)-C(1)-O(1)-C(8)      | 59.9(3)     |
| C(9)-C(8)-O(1)-C(1)      | -176.5(2)   |
| C(10)-C(8)-O(1)-C(1)     | 65.5(3)     |
| C(7)-C(8)-O(1)-C(1)      | -59.0(2)    |
| O(3)-C(11)-O(4)-C(12)    | -1.0(5)     |
| C(6)-C(11)-O(4)-C(12)    | 177.3(3)    |
| O(1B)-C(1B)-C(2B)-C(3B)  | 54.6(3)     |
| C(1B)-C(2B)-C(3B)-C(7B)  | -53.9(3)    |
| C(1B)-C(2B)-C(3B)-C(4B)  | -172.2(2)   |
| C(2B)-C(3B)-C(4B)-C(13B) | -86.8(3)    |
| C(7B)-C(3B)-C(4B)-C(13B) | 152.2(2)    |
| C(2B)-C(3B)-C(4B)-C(5B)  | 148.2(2)    |
| C(7B)-C(3B)-C(4B)-C(5B)  | 27.3(2)     |
| C(13B)-C(4B)-C(5B)-C(6B) | -125.5(2)   |
| C(3B)-C(4B)-C(5B)-C(6B)  | -1.9(3)     |
| C(4B)-C(5B)-C(6B)-O(2B)  | 91.8(3)     |
| C(4B)-C(5B)-C(6B)-C(11B) | -144.9(2)   |
| C(4B)-C(5B)-C(6B)-C(7B)  | -23.7(2)    |
| C(2B)-C(3B)-C(7B)-C(8B)  | 58.0(3)     |
| C(4B)-C(3B)-C(7B)-C(8B)  | -175.9(2)   |
| C(2B)-C(3B)-C(7B)-C(6B)  | -168.90(19) |

|                           |            |
|---------------------------|------------|
| C(4B)-C(3B)-C(7B)-C(6B)   | -42.8(2)   |
| O(2B)-C(6B)-C(7B)-C(3B)   | -77.0(2)   |
| C(11B)-C(6B)-C(7B)-C(3B)  | 160.15(19) |
| C(5B)-C(6B)-C(7B)-C(3B)   | 40.5(2)    |
| O(2B)-C(6B)-C(7B)-C(8B)   | 50.5(3)    |
| C(11B)-C(6B)-C(7B)-C(8B)  | -72.3(3)   |
| C(5B)-C(6B)-C(7B)-C(8B)   | 168.0(2)   |
| C(3B)-C(7B)-C(8B)-O(1B)   | -57.0(3)   |
| C(6B)-C(7B)-C(8B)-O(1B)   | 179.97(19) |
| C(3B)-C(7B)-C(8B)-C(9B)   | -169.0(2)  |
| C(6B)-C(7B)-C(8B)-C(9B)   | 68.0(3)    |
| C(3B)-C(7B)-C(8B)-C(10B)  | 64.4(3)    |
| C(6B)-C(7B)-C(8B)-C(10B)  | -58.7(3)   |
| O(2B)-C(6B)-C(11B)-O(3B)  | 6.8(4)     |
| C(7B)-C(6B)-C(11B)-O(3B)  | 128.6(3)   |
| C(5B)-C(6B)-C(11B)-O(3B)  | -116.9(3)  |
| O(2B)-C(6B)-C(11B)-O(4B)  | -174.4(2)  |
| C(7B)-C(6B)-C(11B)-O(4B)  | -52.5(3)   |
| C(5B)-C(6B)-C(11B)-O(4B)  | 61.9(3)    |
| C(3B)-C(4B)-C(13B)-C(14B) | 117.7(3)   |
| C(5B)-C(4B)-C(13B)-C(14B) | -123.0(3)  |
| C(3B)-C(4B)-C(13B)-C(18B) | -59.6(4)   |
| C(5B)-C(4B)-C(13B)-C(18B) | 59.8(3)    |

|                             |           |
|-----------------------------|-----------|
| C(18B)-C(13B)-C(14B)-C(15B) | 0.5(5)    |
| C(4B)-C(13B)-C(14B)-C(15B)  | -176.8(3) |
| C(13B)-C(14B)-C(15B)-C(16B) | 0.7(5)    |
| C(14B)-C(15B)-C(16B)-C(17B) | -1.5(5)   |
| C(15B)-C(16B)-C(17B)-C(18B) | 1.1(5)    |
| C(16B)-C(17B)-C(18B)-C(13B) | 0.2(5)    |
| C(14B)-C(13B)-C(18B)-C(17B) | -1.0(5)   |
| C(4B)-C(13B)-C(18B)-C(17B)  | 176.4(3)  |
| C(2B)-C(1B)-O(1B)-C(8B)     | -59.4(3)  |
| C(9B)-C(8B)-O(1B)-C(1B)     | 175.9(2)  |
| C(10B)-C(8B)-O(1B)-C(1B)    | -67.0(3)  |
| C(7B)-C(8B)-O(1B)-C(1B)     | 58.2(3)   |
| O(3B)-C(11B)-O(4B)-C(12B)   | -0.4(4)   |
| C(6B)-C(11B)-O(4B)-C(12B)   | -179.2(2) |
| O(1C)-C(1C)-C(2C)-C(3C)     | -54.3(3)  |
| C(1C)-C(2C)-C(3C)-C(7C)     | 52.9(3)   |
| C(1C)-C(2C)-C(3C)-C(4C)     | 170.3(2)  |
| C(2C)-C(3C)-C(4C)-C(13C)    | 83.8(3)   |
| C(7C)-C(3C)-C(4C)-C(13C)    | -155.9(2) |
| C(2C)-C(3C)-C(4C)-C(5C)     | -150.7(2) |
| C(7C)-C(3C)-C(4C)-C(5C)     | -30.4(3)  |
| C(13C)-C(4C)-C(5C)-C(6C)    | 131.9(2)  |
| C(3C)-C(4C)-C(5C)-C(6C)     | 6.4(3)    |

|                          |             |
|--------------------------|-------------|
| C(4C)-C(5C)-C(6C)-O(2C)  | -96.4(3)    |
| C(4C)-C(5C)-C(6C)-C(11C) | 142.4(2)    |
| C(4C)-C(5C)-C(6C)-C(7C)  | 19.7(3)     |
| C(2C)-C(3C)-C(7C)-C(6C)  | 168.81(19)  |
| C(4C)-C(3C)-C(7C)-C(6C)  | 43.4(2)     |
| C(2C)-C(3C)-C(7C)-C(8C)  | -57.7(3)    |
| C(4C)-C(3C)-C(7C)-C(8C)  | 176.9(2)    |
| O(2C)-C(6C)-C(7C)-C(3C)  | 79.1(2)     |
| C(11C)-C(6C)-C(7C)-C(3C) | -158.11(19) |
| C(5C)-C(6C)-C(7C)-C(3C)  | -38.6(2)    |
| O(2C)-C(6C)-C(7C)-C(8C)  | -48.8(3)    |
| C(11C)-C(6C)-C(7C)-C(8C) | 74.0(3)     |
| C(5C)-C(6C)-C(7C)-C(8C)  | -166.5(2)   |
| C(3C)-C(7C)-C(8C)-O(1C)  | 57.8(3)     |
| C(6C)-C(7C)-C(8C)-O(1C)  | -178.60(19) |
| C(3C)-C(7C)-C(8C)-C(9C)  | 169.8(2)    |
| C(6C)-C(7C)-C(8C)-C(9C)  | -66.7(3)    |
| C(3C)-C(7C)-C(8C)-C(10C) | -63.5(3)    |
| C(6C)-C(7C)-C(8C)-C(10C) | 60.1(3)     |
| O(2C)-C(6C)-C(11C)-O(3C) | -9.7(4)     |
| C(7C)-C(6C)-C(11C)-O(3C) | -132.0(3)   |
| C(5C)-C(6C)-C(11C)-O(3C) | 112.4(3)    |
| O(2C)-C(6C)-C(11C)-O(4C) | 172.3(2)    |

|                             |           |
|-----------------------------|-----------|
| C(7C)-C(6C)-C(11C)-O(4C)    | 49.9(3)   |
| C(5C)-C(6C)-C(11C)-O(4C)    | -65.6(3)  |
| C(3C)-C(4C)-C(13C)-C(14C)   | -121.1(3) |
| C(5C)-C(4C)-C(13C)-C(14C)   | 118.5(3)  |
| C(3C)-C(4C)-C(13C)-C(18C)   | 58.5(4)   |
| C(5C)-C(4C)-C(13C)-C(18C)   | -61.9(3)  |
| C(18C)-C(13C)-C(14C)-C(15C) | -0.1(5)   |
| C(4C)-C(13C)-C(14C)-C(15C)  | 179.6(3)  |
| C(13C)-C(14C)-C(15C)-C(16C) | -1.0(5)   |
| C(14C)-C(15C)-C(16C)-C(17C) | 1.4(5)    |
| C(15C)-C(16C)-C(17C)-C(18C) | -0.7(5)   |
| C(16C)-C(17C)-C(18C)-C(13C) | -0.4(5)   |
| C(14C)-C(13C)-C(18C)-C(17C) | 0.8(5)    |
| C(4C)-C(13C)-C(18C)-C(17C)  | -178.9(3) |
| C(2C)-C(1C)-O(1C)-C(8C)     | 60.6(3)   |
| C(9C)-C(8C)-O(1C)-C(1C)     | -176.5(2) |
| C(10C)-C(8C)-O(1C)-C(1C)    | 66.2(3)   |
| C(7C)-C(8C)-O(1C)-C(1C)     | -59.6(3)  |
| O(3C)-C(11C)-O(4C)-C(12C)   | -0.9(4)   |
| C(6C)-C(11C)-O(4C)-C(12C)   | 177.2(3)  |

---

Symmetry transformations used to generate equivalent atoms:

Table 7. Hydrogen bonds for **12** [ $\text{\AA}$  and  $^\circ$ ].

| D-H...A                | d(D-H) | d(H...A) | d(D...A) | $\angle(\text{DHA})$ |
|------------------------|--------|----------|----------|----------------------|
| O(2)-H(2C)...O(1B)#1   | 0.84   | 1.98     | 2.817(3) | 175.7                |
| O(2B)-H(2BC)...O(1)    | 0.84   | 1.99     | 2.776(3) | 154.5                |
| O(2C)-H(2CC)...O(1C)#2 | 0.84   | 1.98     | 2.771(3) | 157.2                |

Symmetry transformations used to generate equivalent atoms:

#1  $x+1, y, z+1$  #2  $x-1/2, -y+1/2, z-1/2$
